# Supplementary material for: Synthesis of novel antibacterial and antifungal quinoxaline derivatives
Source: Royal Society of Chemistry journal article supplement (doi:10.1039/d1ra07559d), 2022-01-01
Supplement: d1ra07559d1.pdf [file d1ra07559d1.pdf]

## Supporting Information

### Synthesis of novel antibacterial and antifungal quinoxaline derivatives

Xuemei Tang<sup>a,†</sup>, Qing Zhou<sup>a,†</sup>, Wenliang Zhan<sup>a</sup>, Die Hu<sup>a</sup>, Ran Zhou<sup>a</sup>, Nan Sun<sup>a</sup>, Shuai Chen<sup>a</sup>, Wenneng Wu<sup>b,\*</sup>, Wei Xue<sup>a,\*</sup>

<sup>a</sup>State Key Laboratory Breeding Base of Green Pesticide and Agricultural Bioengineering; Key Laboratory of Green Pesticide and Agricultural Bioengineering, Ministry of Education; Research and Development Center for Fine Chemicals, Guizhou University, Guiyang 550025, P.R. China

<sup>b</sup>Food and Pharmaceutical Engineering Institute, Guiyang University, Guiyang 550003, P.R. China

†These authors contributed equally to this work.

\*Corresponding author: Tel.: 0086-851-88292090, Fax: 0086-851-88292090, E-mail: wxue@gzu.edu.cn (Wei Xue), wuwenneng123@126.com (Wenneng Wu)

## 1. Abbreviation

| Abbreviation |                     |                                                             |
|--------------|---------------------|-------------------------------------------------------------|
|              | abbreviation        | full name                                                   |
| 1            | <sup>1</sup> H NMR  | <sup>1</sup> H nuclear magnetic resonance                   |
| 2            | <sup>13</sup> C NMR | <sup>13</sup> C nuclear magnetic resonance                  |
| 3            | <sup>19</sup> F NMR | <sup>19</sup> F nuclear magnetic resonance                  |
| 4            | HRMS                | High-resolution mass spectroscopy                           |
| 5            | Xoo                 | <i>Xanthomonas oryzae</i> pv. <i>Oryzae</i>                 |
| 6            | Xcm                 | <i>Xanthomonas campestris</i> pv. <i>Mangiferae indicae</i> |
| 7            | Pcb                 | <i>Pectobacterium carotovorum</i> subsp. <i>Brasiliense</i> |
| 8            | Rs                  | <i>Ralstonia solanocearum</i>                               |
| 9            | Ac                  | <i>Acidovorax citrulli</i>                                  |
| 10           | AB                  | <i>Alternaria brassicae</i>                                 |
| 11           | FF                  | <i>Fusarium fujikuroi</i>                                   |
| 12           | FO                  | <i>Fusarium oxysporum</i> f.sp. <i>cucumerinum</i>          |
| 13           | CT                  | <i>Colletotrichum truncatum</i>                             |
| 14           | PC                  | <i>Phytophthora capsici</i>                                 |
| 15           | CG                  | <i>Colletotrichum gloeosporioides</i>                       |
| 16           | RS                  | <i>Rhizoctonia solani</i>                                   |
| 17           | FG                  | <i>Fusarium graminearum</i>                                 |
| 18           | PS                  | <i>Phytophthora soja</i>                                    |
| 19           | PP                  | <i>Phytophthora palmivora</i>                               |
| 20           | BC                  | <i>Botrytis cinerea</i>                                     |
| 21           | PL                  | <i>Phytophthora litchii</i>                                 |
| 22           | DMSO                | Dimethylsulfoxide                                           |
| 23           | DMF                 | <i>N,N</i> -dimethylformamide                               |
| 24           | TLC                 | Thin Layer Chromatography                                   |
| 25           | m.p.                | Melting point                                               |
| 26           | EC <sub>50</sub>    | 50% effective concentration                                 |
| 27           | NB                  | Nutrient broth                                              |
| 28           | OD                  | Optical density                                             |
| 29           | PDA                 | Potato dextrose agar                                        |
| 30           | TC                  | Thiodiazole-copper                                          |
| 31           | BT                  | Bismethiazol                                                |
| 32           | SEM                 | Scanning electron microscope                                |

## 2. Chemical synthesis

### 2.1 General Procedures for Preparing Target Compounds 5a-5t

Firstly, intermediate **4** (0.85 mmol), K<sub>2</sub>CO<sub>3</sub> (1.28 mmol) and acetonitrile (10 mL) were added into a 50 mL round bottom flask, and the mixture were reflux for 30 min. Then, intermediate **2** (1.28 mmol) dissolved in acetonitrile (5 mL) was added dropwise and the reaction mixture was continued reacted under reflux until the reactant was consumed completely. After that, the water (20 mL) was added into the reaction mixture, and the crude product was precipitated as brown solid promptly. Finally, the target compounds **5a-5t** was purified by column chromatography (petroleum ether: ethyl acetate = 20:1 to 12:1, V/V) with the yield of 36 ~ 91%.

## 3. Biological activities tests

### 3.1 In Vitro Antibacterial Activity Assay

Antibacterial activities of the title compounds against *Xanthomonas oryzae* pv. *Oryzae* (*Xoo*), *Xanthomonas campestris* pv. *Mangiferaeindicae* (*Xcm*), *Pectobacterium carotovorum* subsp. *Brasiliense* (*Pcb*), *Ralstonia solanacearum* (*Rs*) and *Acidovorax citrulli* (*Ac*) were evaluated by using the 96 well plate method. DMSO served as the negative control, commercial agricultural antibacterial thiodiazole-copper (TC) and bismertiazol (BT) were used as positive controls. Briefly, a single previously activated colony was incubated into 30 mL NB medium and cultivated in a constant temperature shaker at 28 °C under 180 r/min until the bacteria grew on the logarithmic phase. Furtherly, two tubes of 2 mL bacterial solution were centrifuged at 6000 rpm for 5 min, the medium liquid was removed and the bacteria was resuspended with 2 mL sterile water. The optical density at 595 nm (OD<sub>595</sub>) of one tube was detected and adjusted to 0.6 using a spectrophotometer, the other tube is reserved. Subsequently, the test compounds were dissolved in 100 µL of dimethylformamide and diluted with NB medium to prepare the drug solution with the final concentrations of 200 and 100 µg/mL, respectively. After that, 10 µL of the liquid sample was added to 190 µL NB medium containing the test compounds, which were performed on 96 well plate. Finally, the inoculated 96 well plate was incubated at (28 ± 1) °C

under continuous shaking at 180 rpm until the OD<sub>595</sub> of the negative control reached 0.6-0.8. The culture growth was monitored spectrophotometric ally by measuring the optical density at 595 nm (OD<sub>595</sub>) and expressed as corrected turbidity, and the relative inhibitory rate (I %) compared with a blank assay was calculated as follows:

$$\text{Relative inhibitory rate } I (\%) = (C_{tur} - T_{tur}) / C_{tur} \times 100$$

In there,  $C_{tur}$  represents the corrected turbidity value of bacterial growth on untreated NB,  $T_{tur}$  represents the corrected turbidity value of bacterial growth on treated NB and  $I$  is the relative inhibitory rate, respectively.

### **3.2 In Vitro Antifungal Assay**

All title compounds were dissolved in dimethylsulfoxide (DMSO: 200  $\mu$ L ) before mixing with potato dextrose agar (PDA: 1980  $\mu$ L). The compounds were tested at a concentration of 100  $\mu$ g/mL. All fungi were previously cultivated in PDA at  $27 \pm 1$  °C for 1-5 d to make new mycelium for the identification of antifungal activity. Then, mycelia dishes with 4 mm diameter were cut from the culture medium and inoculation on the middle of the treated PDA plate using a sterile inoculation needle. DMSO used as the negative control, and azoxystrobin served as the positive control, respectively. Next, the inoculated plates were incubated at  $27 \pm 1$  °C for 1-5 d, all treatments were carried out with three replicates. Finally, the diameter of the fungal colonies was measured and the *in vitro* inhibitory effects of the tested compounds against fungi were statistically analyzed according to the formula, as following:

$$I (\%) = [(C - T) / (C - 0.4)] \times 100\%$$

In there,  $C$  represents the diameter of fungal growth on untreated medium,  $T$  represents the diameter of fungi on treated medium and  $I$  is the inhibition rate, respectively.

## 4. <sup>1</sup>H NMR, <sup>13</sup>C NMR, <sup>19</sup>F NMR and HRMS spectrum of the title compounds

### <sup>1</sup>H NMR, <sup>13</sup>C NMR, <sup>19</sup>F NMR and HRMS spectrum of the title compounds

|                                                                                                                                                | Physical and chemical data                                                                                                                                                                                                                                                                                                                                                                                                                                                                                                                                                                                                                                                                                                                                                                                                                                 |
|------------------------------------------------------------------------------------------------------------------------------------------------|------------------------------------------------------------------------------------------------------------------------------------------------------------------------------------------------------------------------------------------------------------------------------------------------------------------------------------------------------------------------------------------------------------------------------------------------------------------------------------------------------------------------------------------------------------------------------------------------------------------------------------------------------------------------------------------------------------------------------------------------------------------------------------------------------------------------------------------------------------|
| 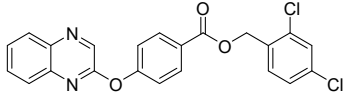 <p>2,4-dichlorobenzyl 4-(quinoxalin-2-yloxy)benzoate(5a)</p> | <p><b><sup>1</sup>H NMR (400 MHz, CDCl<sub>3</sub>)</b> δ 8.74 (s, 1H, Qu-H), 8.21 – 8.19 (m, 1H, Ph-H), 8.19 – 8.17 (m, 1H, Ph-H), 8.09 (dd, <i>J</i> = 8.1, 1.6 Hz, 1H, Qu-H), 7.78 – 7.75 (m, 1H, Qu-H), 7.72 – 7.63 (m, 2H, Qu-H), 7.47 (t, <i>J</i> = 5.3 Hz, 2H, Ph-H), 7.41 – 7.40 (m, 1H, Ph-H), 7.39 – 7.38 (m, 1H, Ph-H), 7.29 (dd, <i>J</i> = 8.3, 2.1 Hz, 1H, Ph-H), 5.45 (s, 2H, O-CH<sub>2</sub>-Ph);</p> <p><b><sup>13</sup>C NMR (101 MHz, CDCl<sub>3</sub>)</b> δ 156.87, 156.22, 139.90, 139.82, 139.82, 139.12, 134.87, 134.58, 132.34, 131.67, 130.86, 130.78, 129.58, 129.05, 127.94, 127.74, 127.31, 126.69, 121.33, 63.59;</p> <p><b>HRMS (ESI) [M+H]<sup>+</sup></b> calcd for C<sub>22</sub>H<sub>14</sub>Cl<sub>2</sub>N<sub>2</sub>O<sub>3</sub>: 425.0454, found: 425.0437; White solid; m.p.: 114.6-116.3 °C; yield, 61%.</p> |
|  <p>4-nitrobenzyl 4-(quinoxalin-2-yloxy)benzoate(5b)</p>    | <p><b><sup>1</sup>H NMR (400 MHz, CDCl<sub>3</sub>)</b> δ 8.74 (s, 1H, Qu-H), 8.29 – 8.28 (m, 1H, Ph-H), 8.27 – 8.26 (m, 1H, Ph-H), 8.23 – 8.21 (m, 1H, Ph-H), 8.20 – 8.19 (m, 1H, Ph-H), 8.10 (dd, <i>J</i> = 8.1, 1.5 Hz, 1H, Qu-H), 7.78 – 7.75 (m, 1H, Qu-H), 7.72 – 7.66 (m, 2H, Qu-H), 7.65 (s, 1H, Ph-H), 7.63 (s, 1H, Ph-H), 7.44 – 7.42 (m, 1H, Ph-H), 7.41 – 7.40 (m, 1H, Ph-H), 5.49 (s, 2H, O-CH<sub>2</sub>-Ph);</p> <p><b><sup>13</sup>C NMR (101 MHz, CDCl<sub>3</sub>)</b> δ 165.46, 157.03, 156.17, 147.76, 143.30, 139.93, 139.72, 139.11, 131.68, 130.74, 129.07, 128.43, 128.00, 127.72, 126.40, 123.95, 121.40, 65.31;</p> <p><b>HRMS (ESI) [M+H]<sup>+</sup></b> calcd for C<sub>22</sub>H<sub>15</sub>N<sub>3</sub>O<sub>5</sub>: 402.1084, found: 402.1078; White solid; m.p.: 164.2-165.6 °C; yield, 58%.</p>                     |
|  <p>2-methylbenzyl 4-(quinoxalin-2-yloxy)benzoate(5c)</p>   | <p><b><sup>1</sup>H NMR (400 MHz, CDCl<sub>3</sub>)</b> δ 8.72 (s, 1H, Qu-H), 8.20 – 8.18 (m, 1H, Ph-H), 8.18 – 8.16 (m, 1H, Ph-H), 8.10 – 8.06 (m, 1H, Ph-H), 7.78 – 7.74 (m, 1H, Ph-H), 7.66 (tdd, <i>J</i> = 9.7, 6.9, 1.6 Hz, 2H, Qu-H), 7.39 – 7.36 (m, 2H, Qu-H), 7.35 (t, <i>J</i> = 2.1 Hz, 2H, Ph-H), 7.21 (d, <i>J</i> = 7.8 Hz, 2H, Ph-H), 5.35 (s, 2H, O-CH<sub>2</sub>-Ph), 2.37 (s, 3H, Ph-CH<sub>3</sub>);</p> <p><b><sup>13</sup>C NMR (101 MHz, CDCl<sub>3</sub>)</b> δ 165.84, 156.63, 156.28, 139.87, 139.82, 139.82, 139.13, 138.23, 132.97, 131.60, 130.68, 129.34, 129.02, 128.46, 127.89, 127.83, 127.22, 121.20, 66.84, 21.29;</p> <p><b>HRMS (ESI) [M+H]<sup>+</sup></b> calcd for C<sub>23</sub>H<sub>18</sub>N<sub>2</sub>O<sub>3</sub>: 371.1390, found: 371.1380; Brown solid; m.p.: 123.2-125.1 °C; yield, 59%.</p>          |
|  <p>2-fluorobenzyl 4-(quinoxalin-2-yloxy)benzoate(5d)</p>   | <p><b><sup>1</sup>H NMR (400 MHz, CDCl<sub>3</sub>)</b> δ 8.73 (s, 1H, Qu-H), 8.20 – 8.19 (m, 1H, Ph-H), 8.18 – 8.17 (m, 1H, Ph-H), 8.08 (dd, <i>J</i> = 8.1, 1.5 Hz, 1H, Ph-H), 7.78 – 7.75 (m, 1H, Ph-H), 7.67 (tt, <i>J</i> = 6.9, 5.3 Hz, 2H, Qu-H), 7.51 (td, <i>J</i> = 7.5, 1.6 Hz, 1H, Qu-H), 7.38 (d, <i>J</i> = 1.9 Hz, 1H, Qu-H), 7.35 (ddd, <i>J</i> = 7.3, 4.9, 1.8 Hz, 2H, Ph-H), 7.20 – 7.09 (m, 2H, Ph-H), 5.46 (s, 2H, O-CH<sub>2</sub>-Ph);</p> <p><b><sup>13</sup>C NMR (101 MHz, CDCl<sub>3</sub>)</b> δ 165.68, 162.37, 156.73, 156.26, 139.88, 139.76, 139.12, 131.65, 130.74, 130.68, 130.41, 129.03, 127.75, 126.95, 124.27, 123.23, 123.08, 121.26, 115.50, 60.87;</p>                                                                                                                                                            |

|                                                                                                                                                               |                                                                                                                                                                                                                                                                                                                                                                                                                                                                                                                                                                                                                                                                                                                                                                                                                                                                                                   |
|---------------------------------------------------------------------------------------------------------------------------------------------------------------|---------------------------------------------------------------------------------------------------------------------------------------------------------------------------------------------------------------------------------------------------------------------------------------------------------------------------------------------------------------------------------------------------------------------------------------------------------------------------------------------------------------------------------------------------------------------------------------------------------------------------------------------------------------------------------------------------------------------------------------------------------------------------------------------------------------------------------------------------------------------------------------------------|
|                                                                                                                                                               | <p><b><sup>19</sup>F NMR (376 MHz, CDCl<sub>3</sub>)</b> δ -117.78;</p> <p><b>HRMS (ESI) [M+H]<sup>+</sup></b> calcd for C<sub>22</sub>H<sub>15</sub>FN<sub>2</sub>O<sub>3</sub>: 375.1139, found: 375.1128; Brown solid; m.p.: 97.1-98.7 °C; yield, 67%.</p>                                                                                                                                                                                                                                                                                                                                                                                                                                                                                                                                                                                                                                     |
| 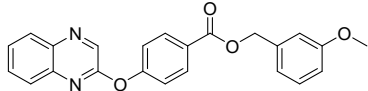 <p>3-methoxybenzyl 4-(quinoxalin-2-yloxy)benzoate(<b>5e</b>)</p>            | <p><b><sup>1</sup>H NMR (400 MHz, CDCl<sub>3</sub>)</b> δ 8.73 (s, 1H, Qu-H), 8.21 – 8.20 (m, 1H, Ph-H), 8.19 – 8.18 (m, 1H, Ph-H), 8.08 (dd, <i>J</i> = 8.1, 1.5 Hz, 1H, Qu-H), 7.78 – 7.75 (m, 1H, Qu-H), 7.71 – 7.62 (m, 2H, Qu-H), 7.40 – 7.38 (m, 1H, Ph-H), 7.37 – 7.35 (m, 1H, Ph-H), 7.32 (t, <i>J</i> = 7.9 Hz, 1H, Ph-H), 7.06 – 7.00 (m, 2H, Ph-H), 6.91 – 6.88 (m, 1H, Ph-H), 5.36 (s, 2H, O-CH<sub>2</sub>-Ph), 3.83 (s, 3H, Ph-O-CH<sub>3</sub>);</p> <p><b><sup>13</sup>C NMR (101 MHz, CDCl<sub>3</sub>)</b> δ 165.75, 159.79, 156.72, 156.27, 139.89, 139.78, 139.12, 137.53, 131.62, 130.67, 129.74, 129.03, 127.89, 127.76, 127.10, 121.23, 120.41, 113.76, 113.69, 66.69, 55.31;</p> <p><b>HRMS (ESI) [M+H]<sup>+</sup></b> calcd for C<sub>23</sub>H<sub>18</sub>N<sub>2</sub>O<sub>4</sub>: 387.1339, found: 387.1328; Brown solid; m.p.: 94.6-96.3 °C; yield, 49%.</p>     |
|  <p>2-chlorobenzyl 4-(quinoxalin-2-yloxy)benzoate(<b>5f</b>)</p>             | <p><b><sup>1</sup>H NMR (400 MHz, CDCl<sub>3</sub>)</b> δ 8.73 (s, 1H, Qu-H), 8.23 – 8.21 (m, 1H, Ph-H), 8.20 – 8.19 (m, 1H, Ph-H), 8.09 (dd, <i>J</i> = 8.1, 1.6 Hz, 1H, Qu-H), 7.78 – 7.76 (m, 1H, Qu-H), 7.71 – 7.63 (m, 2H, Qu-H), 7.53 (dd, <i>J</i> = 5.7, 3.6 Hz, 1H, Ph-H), 7.44 (dd, <i>J</i> = 5.6, 3.6 Hz, 1H, Ph-H), 7.41 – 7.39 (m, 1H, Ph-H), 7.39 – 7.37 (m, 1H, Ph-H), 7.31 (dd, <i>J</i> = 5.8, 3.5 Hz, 2H, Ph-H), 5.50 (s, 2H, O-CH<sub>2</sub>-Ph);</p> <p><b><sup>13</sup>C NMR (101 MHz, CDCl<sub>3</sub>)</b> δ 165.60, 156.78, 156.25, 139.89, 139.77, 139.12, 133.87, 133.69, 131.67, 130.68, 129.98, 129.70, 129.66, 129.03, 127.91, 127.76, 126.98, 126.93, 121.28, 64.24;</p> <p><b>HRMS (ESI) [M+H]<sup>+</sup></b> calcd for C<sub>22</sub>H<sub>15</sub>ClN<sub>2</sub>O<sub>3</sub>: 391.0844, found: 391.0834; White solid; m.p.: 109.4-110.7 °C; yield, 52%.</p> |
|  <p>3-fluorobenzyl 4-(quinoxalin-2-yloxy)benzoate(<b>5g</b>)</p>           | <p><b><sup>1</sup>H NMR (400 MHz, CDCl<sub>3</sub>)</b> δ 8.73 (s, 1H, Qu-H), 8.21 – 8.19 (m, 1H, Ph-H), 8.19 – 8.17 (m, 1H, Ph-H), 8.09 (dd, <i>J</i> = 8.1, 1.5 Hz, 1H, Qu-H), 7.79 – 7.75 (m, 1H, Qu-H), 7.72 – 7.63 (m, 2H, Qu-H), 7.46 (d, <i>J</i> = 0.6 Hz, 1H, Ph-H), 7.41 – 7.40 (m, 1H, Ph-H), 7.39 – 7.37 (m, 1H, Ph-H), 7.36 – 7.32 (m, 3H, Ph-H), 5.36 (s, 2H, O-CH<sub>2</sub>-Ph);</p> <p><b><sup>13</sup>C NMR (101 MHz, CDCl<sub>3</sub>)</b> δ 165.61, 156.84, 139.91, 139.11, 137.99, 134.54, 131.64, 130.68, 129.97, 129.04, 128.50, 128.22, 127.92, 127.76, 126.81, 126.23, 121.29, 65.91;</p> <p><b><sup>19</sup>F NMR (376 MHz, CDCl<sub>3</sub>)</b> δ -117.78;</p> <p><b>HRMS (ESI) [M+H]<sup>+</sup></b> calcd for C<sub>22</sub>H<sub>15</sub>FN<sub>2</sub>O<sub>3</sub>: 373.0983, found: 373.0966; Yellow solid; m.p.: 74.3-75.9 °C; yield, 64%.</p>                |
|  <p>4-chlorobenzyl 4-((6-chloroquinoxalin-2-yl)oxy)benzoate(<b>5h</b>)</p> | <p><b><sup>1</sup>H NMR (400 MHz, CDCl<sub>3</sub>)</b> δ 8.73 (s, 1H, Qu-H), 8.20 – 8.18 (m, 1H, Ph-H), 8.17 – 8.16 (m, 1H, Ph-H), 8.11 – 8.07 (m, 1H, Qu-H), 7.78 – 7.75 (m, 1H, Qu-H), 7.71 – 7.63 (m, 2H, Qu-H), 7.43 – 7.40 (m, 1H, Ph-H), 7.40 (d, <i>J</i> = 2.1 Hz, 2H, Ph-H), 7.38 – 7.37 (m, 2H, Ph-H), 7.36 (dd, <i>J</i> = 2.6, 1.2 Hz, 1H, Ph-H), 5.35 (s, 2H, O-CH<sub>2</sub>-Ph);</p> <p><b><sup>13</sup>C NMR (101 MHz, CDCl<sub>3</sub>)</b> δ 165.64, 156.77, 156.21, 139.87, 139.73, 139.08, 134.47, 134.22, 131.57, 130.65, 129.64, 129.01, 128.83, 127.89, 127.71, 126.86, 121.24, 65.98;</p> <p><b>HRMS (ESI) [M+H]<sup>+</sup></b> calcd for C<sub>22</sub>ClH<sub>15</sub>N<sub>2</sub>O<sub>3</sub>: 391.0844, found: 391.0836; Brown solid; m.p.: 104.5–106.1 °C; yield, 73%.</p>                                                                                      |

|                                                                                                                                                                   |                                                                                                                                                                                                                                                                                                                                                                                                                                                                                                                                                                                                                                                                                                                                                                                                                                                                                                                                                                          |
|-------------------------------------------------------------------------------------------------------------------------------------------------------------------|--------------------------------------------------------------------------------------------------------------------------------------------------------------------------------------------------------------------------------------------------------------------------------------------------------------------------------------------------------------------------------------------------------------------------------------------------------------------------------------------------------------------------------------------------------------------------------------------------------------------------------------------------------------------------------------------------------------------------------------------------------------------------------------------------------------------------------------------------------------------------------------------------------------------------------------------------------------------------|
| 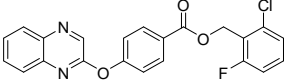 <p>2-chloro-6-fluorobenzyl 4-(quinoxalin-2-yloxy)benzoate(<b>5i</b>)</p>        | <p><b><sup>1</sup>H NMR (400 MHz, CDCl<sub>3</sub>)</b> δ 8.72 (s, 1H, Qu-H), 8.17 – 8.16 (m, 1H, Ph-H), 8.15 – 8.13 (m, 1H, Ph-H), 8.08 (dd, <i>J</i> = 8.1, 1.5 Hz, 1H, Qu-H), 7.77 – 7.74 (m, 1H, Qu-H), 7.70 – 7.62 (m, 2H, Qu-H), 7.36 (d, <i>J</i> = 2.0 Hz, 1H, Ph-H), 7.35 (d, <i>J</i> = 2.0 Hz, 1H, Ph-H), 7.32 (dd, <i>J</i> = 8.1, 5.8 Hz, 1H, Ph-H), 7.28 (s, 1H, Ph-H), 7.10 – 7.05 (m, 1H, Ph-H), 5.55 (d, <i>J</i> = 1.7 Hz, 2H, O-CH<sub>2</sub>-Ph);</p> <p><b><sup>13</sup>C NMR (101 MHz, CDCl<sub>3</sub>)</b> δ 165.61, 160.84, 156.71, 156.26, 139.87, 139.82, 139.11, 136.60, 131.68, 130.88, 130.66, 129.02, 127.88, 127.82, 126.84, 125.56, 121.66, 121.23, 114.28, 57.91;</p> <p><b><sup>19</sup>F NMR (376 MHz, CDCl<sub>3</sub>)</b> δ -112.69;</p> <p><b>HRMS (ESI) [M+H]<sup>+</sup></b> calcd for C<sub>22</sub>H<sub>14</sub>ClFN<sub>2</sub>O<sub>3</sub>: 409.0749, found: 409.0736; Brown solid; m.p.: 90.8–91.4 °C; yield, 54%;</p> |
|  <p>4-cyanobenzyl 4-(quinoxalin-2-yloxy)benzoate(<b>5j</b>)</p>                  | <p><b><sup>1</sup>H NMR (400 MHz, CDCl<sub>3</sub>)</b> δ 8.74 (s, 1H, Qu-H), 8.22 – 8.20 (m, 1H, Ph-H), 8.19 – 8.18 (m, 1H, 1H, Ph-H), 8.09 (dd, <i>J</i> = 8.1, 1.5 Hz, 1H, 1H, Qu-H), 7.78 – 7.75 (m, 1H, Qu-H), 7.72 – 7.69 (m, 3H, Ph-H), 7.68 – 7.64 (m, 1H, Ph-H), 7.57 (d, <i>J</i> = 8.4 Hz, 2H, Qu-H), 7.43 – 7.41 (m, 1H, Ph-H), 7.41 – 7.39 (m, 1H, Ph-H), 5.44 (s, 2H, 2H, O-CH<sub>2</sub>-Ph);</p> <p><b><sup>13</sup>C NMR (101 MHz, CDCl<sub>3</sub>)</b> δ 165.48, 156.99, 156.18, 141.34, 139.92, 139.72, 139.10, 132.52, 131.65, 130.73, 129.06, 128.34, 127.98, 127.71, 126.47, 121.38, 118.61, 112.12, 65.59;</p> <p><b>HRMS (ESI) [M+H]<sup>+</sup></b> calcd for C<sub>23</sub>H<sub>15</sub>N<sub>3</sub>O<sub>3</sub>: 382.1186, found: 382.1174; White solid; m.p.: 142.1–143.5 °C; yield, 91%.</p>                                                                                                                                           |
|  <p>2,4-dichlorobenzyl 4-((6-chloroquinoxalin-2-yl)oxy)benzoate(<b>5k</b>)</p> | <p><b><sup>1</sup>H NMR (400 MHz, CDCl<sub>3</sub>)</b> δ 8.74 (s, 1H, Qu-H), 8.21 – 8.19 (m, 1H, Ph-H), 8.19 – 8.17 (m, 1H, Ph-H), 8.08 (d, <i>J</i> = 2.2 Hz, 1H, Ph-H), 7.65 (dt, <i>J</i> = 8.9, 5.6 Hz, 2H, Ph-H), 7.49 – 7.45 (m, 2H, Qu-H), 7.40 – 7.38 (m, 1H, Qu-H), 7.38 – 7.36 (m, 1H, Ph-H), 7.29 (dd, <i>J</i> = 8.2, 2.1 Hz, 1H, Ph-H), 5.45 (s, 2H, O-CH<sub>2</sub>-Ph);</p> <p><b><sup>13</sup>C NMR (101 MHz, CDCl<sub>3</sub>)</b> δ 165.40, 156.43, 156.43, 140.04, 138.26, 134.88, 134.59, 133.45, 132.26, 131.57, 131.57, 130.88, 129.57, 128.82, 128.05, 127.28, 126.90, 121.38, 63.60;</p> <p><b>HRMS (ESI) [M+H]<sup>+</sup></b> calcd for C<sub>22</sub>H<sub>13</sub>Cl<sub>3</sub>N<sub>2</sub>O<sub>3</sub>: 459.0064, found: 459.0051; White solid; m.p.: 149.1–150.3 °C; yield, 62%.</p>                                                                                                                                                  |
|  <p>4-nitrobenzyl 4-((6-chloroquinoxalin-2-yl)oxy)benzoate(<b>5l</b>)</p>      | <p><b><sup>1</sup>H NMR (400 MHz, CDCl<sub>3</sub>)</b> δ 8.74 (s, 1H, Qu-H), 8.29 – 8.27 (m, 1H, Ph-H), 8.27 – 8.25 (m, 1H, Ph-H), 8.23 – 8.21 (m, 1H, Ph-H), 8.21 – 8.19 (m, 1H, Ph-H), 8.08 (d, <i>J</i> = 2.2 Hz, 1H, Ph-H), 7.71 – 7.64 (m, 3H Qu-H), 7.62 (s, 1H, Ph-H), 7.42 – 7.41 (m, 1H, Ph-H), 7.40 – 7.39 (m, 1H, Ph-H), 5.49 (s, 2H, O-CH<sub>2</sub>-Ph);</p> <p><b><sup>13</sup>C NMR (101 MHz, CDCl<sub>3</sub>)</b> δ 165.39, 156.72, 156.32, 147.78, 143.25, 140.20, 140.08, 138.26, 133.54, 131.62, 131.62, 128.82, 128.44, 128.10, 126.63, 123.95, 121.49, 65.35;</p> <p><b>HRMS (ESI) [M+H]<sup>+</sup></b> calcd for C<sub>22</sub>H<sub>14</sub>ClN<sub>3</sub>O<sub>5</sub>: 436.0694, found: 436.0694; Brown solid; m.p.: 157.2–159.0 °C; yield, 51%.</p>                                                                                                                                                                                       |
|  <p>2-methylbenzyl 4-((6-chloroquinoxalin-2-yl)oxy)benzoate(<b>5m</b>)</p>     | <p><b><sup>1</sup>H NMR (400 MHz, CDCl<sub>3</sub>)</b> δ 8.72 (s, 1H, Qu-H), 8.20 – 8.18 (m, 1H, Ph-H), 8.17 – 8.16 (m, 1H, Ph-H), 8.07 (d, <i>J</i> = 2.3 Hz, 1H, Ph-H), 7.70 – 7.67 (m, 1H, Ph-H), 7.62 (dd, <i>J</i> = 8.9, 2.3 Hz, 1H, Ph-H), 7.37 (s, 1H, Qu-H), 7.36 (d, <i>J</i> = 2.2 Hz, 2H, Qu-H), 7.34 – 7.33 (m, 1H, Ph-H), 7.21 (d, <i>J</i> = 7.8 Hz, 2H, Ph-H), 5.35 (s, 2H, O-CH<sub>2</sub>-Ph), 2.37 (s, 3H, CH<sub>3</sub>, Ph-O-CH<sub>3</sub>);</p>                                                                                                                                                                                                                                                                                                                                                                                                                                                                                                |

|                                                                                                                                                               |                                                                                                                                                                                                                                                                                                                                                                                                                                                                                                                                                                                                                                                                                                                                                                                                                                                                                                                                 |
|---------------------------------------------------------------------------------------------------------------------------------------------------------------|---------------------------------------------------------------------------------------------------------------------------------------------------------------------------------------------------------------------------------------------------------------------------------------------------------------------------------------------------------------------------------------------------------------------------------------------------------------------------------------------------------------------------------------------------------------------------------------------------------------------------------------------------------------------------------------------------------------------------------------------------------------------------------------------------------------------------------------------------------------------------------------------------------------------------------|
|                                                                                                                                                               | <p><b><sup>13</sup>C NMR (101 MHz, CDCl<sub>3</sub>)</b> δ 165.77, 156.43, 156.33, 140.08, 140.05, 138.33, 138.25, 133.42, 132.94, 131.61, 131.47, 129.34, 128.87, 128.47, 128.06, 127.46, 121.28, 66.87, 21.28;</p> <p><b>HRMS (ESI) [M+H]<sup>+</sup></b> calcd for C<sub>23</sub>H<sub>17</sub>ClN<sub>2</sub>O<sub>3</sub>: 405.1000, found: 405.0999; Brown solid; m.p.: 89.9–90.8 °C; yield, 36%.</p>                                                                                                                                                                                                                                                                                                                                                                                                                                                                                                                     |
| 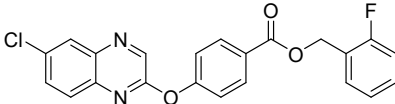 <p>2-fluorobenzyl 4-((6-chloroquinoxalin-2-yl)oxy)benzoate(<b>5n</b>)</p>   | <p><b><sup>1</sup>H NMR (400 MHz, CDCl<sub>3</sub>)</b> δ 8.73 (s, 1H, Qu-H), 8.20 – 8.19 (m, 1H, Ph-H), 8.18 – 8.17 (m, 1H, Ph-H), 8.07 (d, <i>J</i> = 2.3 Hz, 1H, Ph-H), 7.68 (d, <i>J</i> = 8.9 Hz, 1H, Ph-H), 7.62 (dd, <i>J</i> = 8.9, 2.3 Hz, 1H, Ph-H), 7.50 (td, <i>J</i> = 7.5, 1.6 Hz, 1H, Ph-H), 7.38 – 7.34 (m, 3H, Qu-H), 7.20 – 7.09 (m, 2H, Ph-H), 5.46 (s, 2H, CH<sub>2</sub>, O-CH<sub>2</sub>-Ph);</p> <p><b><sup>13</sup>C NMR (101 MHz, CDCl<sub>3</sub>)</b> δ 165.61, 162.38, 156.43, 140.07, 138.31, 133.43, 131.66, 131.48, 130.72, 130.44, 130.36, 128.86, 128.06, 127.19, 124.23, 123.05, 121.34, 115.51, 60.87;</p> <p><b><sup>19</sup>F NMR (376 MHz, CDCl<sub>3</sub>)</b> δ -117.78;</p> <p><b>HRMS (ESI) [M+H]<sup>+</sup></b> calcd for C<sub>22</sub>H<sub>14</sub>ClFN<sub>2</sub>O<sub>3</sub>: 409.0749, found: 409.0741; White solid; m.p.: 100.6–101.9 °C; yield, 75%.</p>                |
|  <p>3-methoxybenzyl 4-((6-chloroquinoxalin-2-yl)oxy)benzoate(<b>5o</b>)</p> | <p><b><sup>1</sup>H NMR (400 MHz, CDCl<sub>3</sub>)</b> δ 8.73 (s, 1H, Qu-H), 8.22 – 8.20 (m, 1H, Ph-H), 8.19 – 8.18 (m, 1H, Ph-H), 8.08 (d, <i>J</i> = 2.2 Hz, 1H, Ph-H), 7.65 (dt, <i>J</i> = 8.9, 5.6 Hz, 2H, Qu-H), 7.37 (d, <i>J</i> = 2.0 Hz, 1H, Ph-H), 7.35 (d, <i>J</i> = 2.0 Hz, 1H, Ph-H), 7.31 (d, <i>J</i> = 7.9 Hz, 1H, Qu-H), 7.03 (dd, <i>J</i> = 16.5, 4.8 Hz, 2H, Ph-H), 6.90 (dd, <i>J</i> = 8.2, 2.0 Hz, 1H, Ph-H), 5.37 (s, 2H, O-CH<sub>2</sub>-Ph), 3.84 (s, 3H, Ph-O-CH<sub>3</sub>);</p> <p><b><sup>13</sup>C NMR (101 MHz, CDCl<sub>3</sub>)</b> δ 165.69, 159.78, 156.42, 140.08, 138.32, 137.48, 133.44, 131.56, 131.56, 129.75, 128.87, 128.06, 127.32, 121.32, 120.42, 113.73, 113.73, 66.73, 55.32;</p> <p><b>HRMS (ESI) [M+H]<sup>+</sup></b> calcd for C<sub>23</sub>H<sub>17</sub>ClN<sub>2</sub>O<sub>4</sub>: 421.0949, found: 421.0938; Brown solid; m.p.: 116.6–118.3 °C; yield, 80%.</p> |
|  <p>2-chlorobenzyl 4-((6-chloroquinoxalin-2-yl)oxy)benzoate(<b>5p</b>)</p> | <p><b><sup>1</sup>H NMR (400 MHz, CDCl<sub>3</sub>)</b> δ 8.73 (s, 1H, Qu-H), 8.23 – 8.21 (m, 1H, Ph-H), 8.20 (d, <i>J</i> = 2.0 Hz, 1H, Ph-H), 8.08 (d, <i>J</i> = 2.2 Hz, 1H, Ph-H), 7.65 (dt, <i>J</i> = 8.9, 5.6 Hz, 2H, Qu-H), 7.53 (dd, <i>J</i> = 5.6, 3.7 Hz, 1H, Qu-H), 7.45 – 7.42 (m, 1H, Ph-H), 7.39 – 7.38 (m, 1H, Ph-H), 7.37 – 7.36 (m, 1H, Ph-H), 7.31 (dd, <i>J</i> = 5.9, 3.5 Hz, 2H, Ph-H), 5.50 (s, 2H, O-CH<sub>2</sub>-Ph);</p> <p><b><sup>13</sup>C NMR (101 MHz, CDCl<sub>3</sub>)</b> δ 165.50, 156.43, 140.04, 138.27, 133.87, 133.60, 133.41, 131.65, 131.45, 129.98, 129.66, 128.83, 128.03, 127.12, 126.94, 121.33, 64.25;</p> <p><b>HRMS (ESI) [M+H]<sup>+</sup></b> calcd for C<sub>22</sub>H<sub>14</sub>Cl<sub>2</sub>N<sub>2</sub>O<sub>3</sub>: 425.0454, found: 425.0442; White solid; m.p.: 115.3–117.1 °C; yield, 69%.</p>                                                                |
|  <p>3-fluorobenzyl 4-((6-chloroquinoxalin-2-yl)oxy)benzoate(<b>5q</b>)</p> | <p><b><sup>1</sup>H NMR (400 MHz, CDCl<sub>3</sub>)</b> δ 8.73 (s, 1H, Qu-H), 8.20 – 8.19 (m, 1H, Ph-H), 8.18 – 8.17 (m, 1H, Ph-H), 8.07 (d, <i>J</i> = 2.2 Hz, 1H, Ph-H), 7.68 (d, <i>J</i> = 8.8 Hz, 1H, Qu-H), 7.62 (dd, <i>J</i> = 8.9, 2.3 Hz, 1H, Qu-H), 7.50 (td, <i>J</i> = 7.5, 1.7 Hz, 1H, Qu-H), 7.38 – 7.34 (m, 3H, Ph-H), 7.20 – 7.09 (m, 2H, Ph-H), 5.46 (s, 2H, O-CH<sub>2</sub>-Ph);</p> <p><b><sup>13</sup>C NMR (101 MHz, CDCl<sub>3</sub>)</b> δ 165.57, 162.35, 156.39, 40.04, 138.28, 133.40, 131.63, 131.45, 130.69, 130.40, 130.32, 128.83, 128.03, 127.15, 124.19, 123.15, 121.30, 115.48, 60.88;</p> <p><b><sup>19</sup>F NMR (376 MHz, CDCl<sub>3</sub>)</b> δ -117.78;</p> <p><b>HRMS (ESI) [M+H]<sup>+</sup></b> calcd for C<sub>22</sub>H<sub>14</sub>ClFN<sub>2</sub>O<sub>3</sub>: 409.0749, found: 409.0761; Brown solid; m.p.: 115.3–117.1 °C; yield, 69%.</p>                                 |



|                                                                                                                                                                      |                                                                                                                                                                                                                                                                                                                                                                                                                                                                                                                                                                                                                                                                                                                                                                                                                                                                                                  |
|----------------------------------------------------------------------------------------------------------------------------------------------------------------------|--------------------------------------------------------------------------------------------------------------------------------------------------------------------------------------------------------------------------------------------------------------------------------------------------------------------------------------------------------------------------------------------------------------------------------------------------------------------------------------------------------------------------------------------------------------------------------------------------------------------------------------------------------------------------------------------------------------------------------------------------------------------------------------------------------------------------------------------------------------------------------------------------|
| 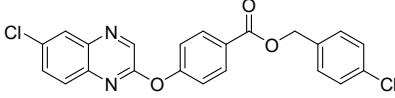 <p>4-chlorobenzyl 4-((6-chloroquinoxalin-2-yl)oxy)benzoate(<b>5r</b>)</p>          | <p>solid; m.p.: 90.1–92.6 °C; yield, 53%.</p> <p><b><sup>1</sup>H NMR (400 MHz, CDCl<sub>3</sub>)</b> δ 8.73 (s, 1H, Qu-H), 8.20 – 8.18 (m, 1H, Ph-H), 8.17 – 8.16 (m, 1H, Ph-H), 8.08 (d, <i>J</i> = 2.2 Hz, 1H, Ph-H), 7.69 (d, <i>J</i> = 8.9 Hz, 1H, Qu-H), 7.63 (dd, <i>J</i> = 8.9, 2.3 Hz, 1H, Qu-H), 7.42 – 7.39 (m, 2H, Qu-H, Ph-H), 7.38 (s, 1H, Ph-H), 7.38 – 7.35 (m, 3H, Ph-H), 5.35 (s, 2H, O-CH<sub>2</sub>-Ph);</p> <p><b><sup>13</sup>C NMR (101 MHz, CDCl<sub>3</sub>)</b> δ 165.61, 165.39, 156.48, 140.07, 138.30, 134.45, 134.28, 133.47, 131.62, 131.50, 129.69, 128.87, 128.08, 127.12, 121.36, 66.06;</p> <p><b>HRMS (ESI) [M+H]<sup>+</sup></b> calcd for C<sub>22</sub>H<sub>14</sub>Cl<sub>2</sub>N<sub>2</sub>O<sub>3</sub>: 425.0454, found: 425.0442; Brown solid; m.p.: 105.6–107.4 °C; yield, 48%.</p>                                                           |
|  <p>2-chloro-6-fluorobenzyl 4-((6-chloroquinoxalin-2-yl)oxy)benzoate(<b>5s</b>)</p> | <p><b><sup>1</sup>H NMR (400 MHz, CDCl<sub>3</sub>)</b> δ 8.79 – 8.66 (m, 1H, Qu-H), 8.16 (dd, <i>J</i> = 10.8, 4.2 Hz, 2H, Ph-H), 8.07 (dd, <i>J</i> = 6.1, 1.9 Hz, 1H, Ph-H), 7.71 – 7.66 (m, 1H, Ph-H), 7.66 – 7.60 (m, 1H, Ph-H), 7.41 – 7.31 (m, 3H, Qu-H), 7.29 (d, <i>J</i> = 8.2 Hz, 1H, Ph-H), 7.12 – 7.04 (m, 1H, Ph-H), 5.56 (d, <i>J</i> = 6.3 Hz, 2H, O-CH<sub>2</sub>-Ph);</p> <p><b><sup>13</sup>C NMR (101 MHz, CDCl<sub>3</sub>)</b> δ 165.55, 163.36, 160.85, 156.42, 140.06, 138.33, 136.64, 133.43, 131.71, 131.48, 131.01, 128.87, 128.06, 127.08, 125.58, 121.81, 121.33, 114.52, 57.91;</p> <p><b><sup>19</sup>F NMR (376 MHz, CDCl<sub>3</sub>)</b> δ -112.69;</p> <p><b>HRMS (ESI) [M+H]<sup>+</sup></b> calcd for C<sub>22</sub>H<sub>13</sub>Cl<sub>2</sub>FN<sub>2</sub>O<sub>3</sub>: 443.0360, found: 443.0343; Brown solid; m.p.: 105.6–106.8 °C; yield, 55%.</p> |
|  <p>4-cyanobenzyl 4-((6-chloroquinoxalin-2-yl)oxy)benzoate(<b>5t</b>)</p>         | <p><b><sup>1</sup>H NMR (400 MHz, CDCl<sub>3</sub>)</b> δ 8.74 (s, 1H, Qu-H), 8.22 – 8.20 (m, 1H, Ph-H), 8.19 – 8.18 (m, 1H, Ph-H), 8.08 (d, <i>J</i> = 2.2 Hz, 1H, Ph-H), 7.71 (d, <i>J</i> = 1.7 Hz, 1H, Qu-H), 7.70 – 7.67 (m, 2H, Qu-H), 7.63 (dd, <i>J</i> = 8.9, 2.3 Hz, 1H, Ph-H), 7.57 (d, <i>J</i> = 8.5 Hz, 2H, Ph-H), 7.41 (d, <i>J</i> = 2.0 Hz, 1H, Ph-H), 7.39 – 7.38 (m, 1H, Ph-H), 5.44 (s, 2H, O-CH<sub>2</sub>-Ph);</p> <p><b><sup>13</sup>C NMR (101 MHz, CDCl<sub>3</sub>)</b> δ 165.41, 156.68, 156.33, 141.29, 140.06, 138.26, 133.52, 132.52, 131.67 (s), 131.54, 128.82, 128.36, 128.10, 126.70, 121.47, 118.59, 112.14, 65.63;</p> <p><b>HRMS (ESI) [M+H]<sup>+</sup></b> calcd for C<sub>23</sub>H<sub>14</sub>ClN<sub>3</sub>O<sub>3</sub>: 416.0796, found: 416.0780; White solid; m.p.: 139.9–141.5 °C; yield, 45%.</p>                                             |

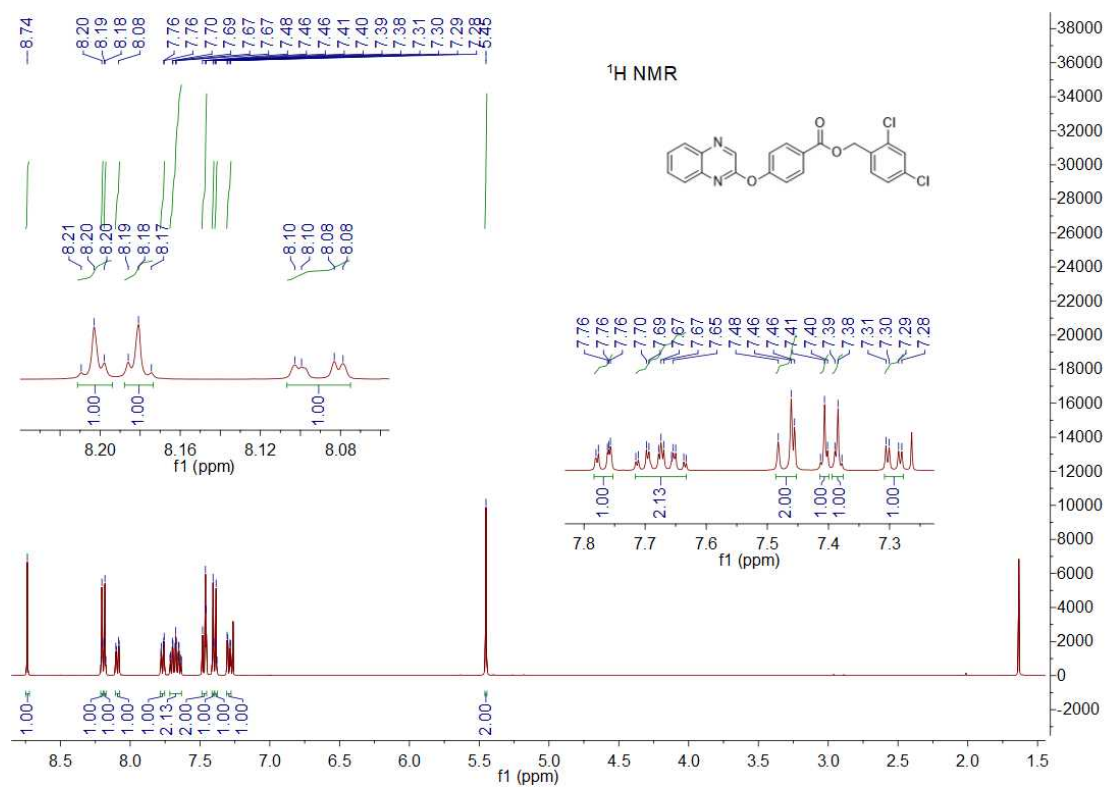

**<sup>1</sup>H NMR spectrum of compound 5a**

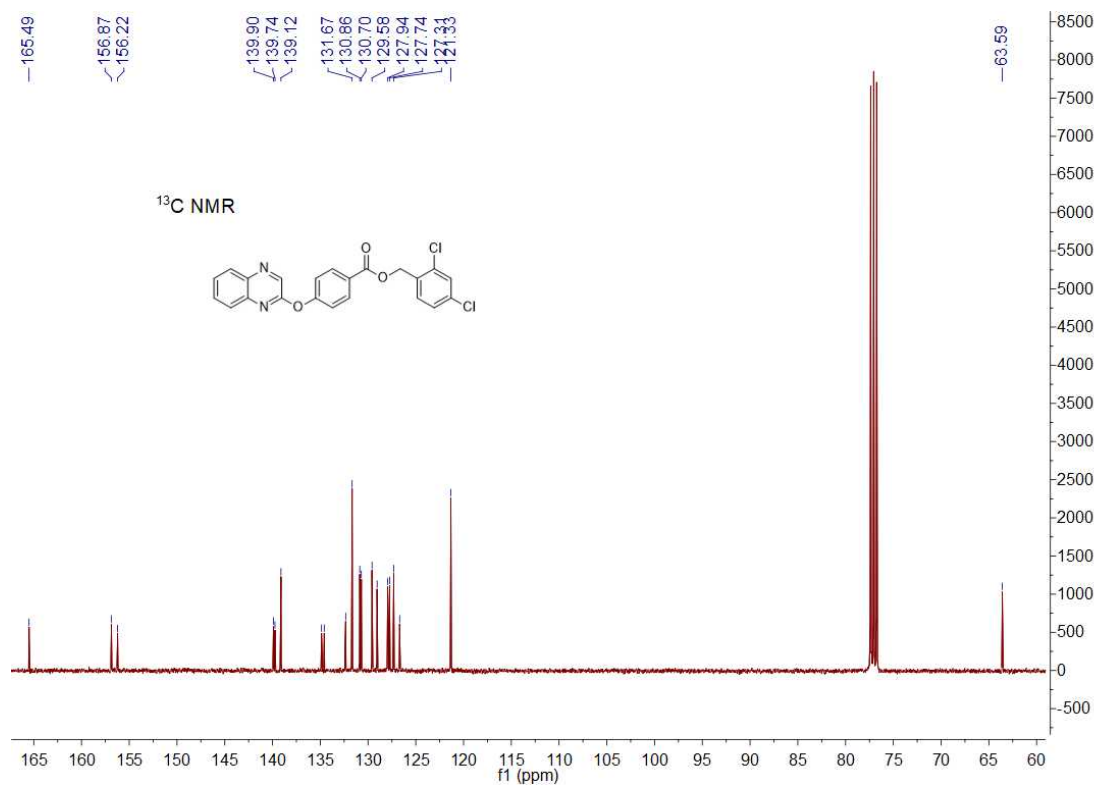

**<sup>13</sup>C NMR spectrum of compound 5a**

TXM-X-1 #22 RT: 0.10 AV: 1 NL: 5.07E4  
T: FTMS + p ESI Full ms [100.0000-1500.0000]

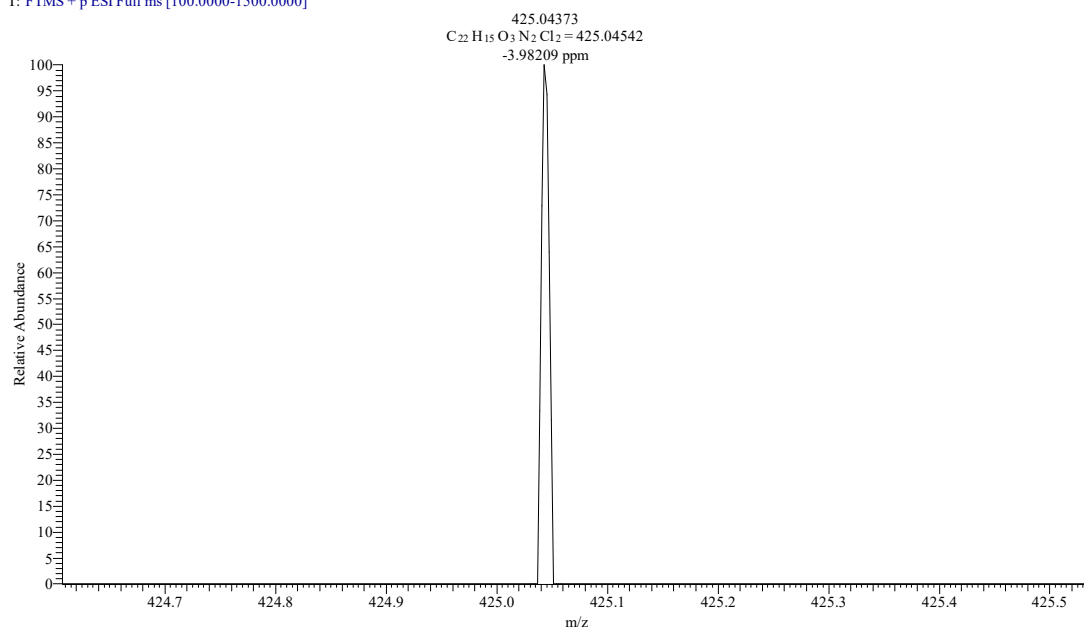

HRMS (ESI) spectrum of compound **5a**

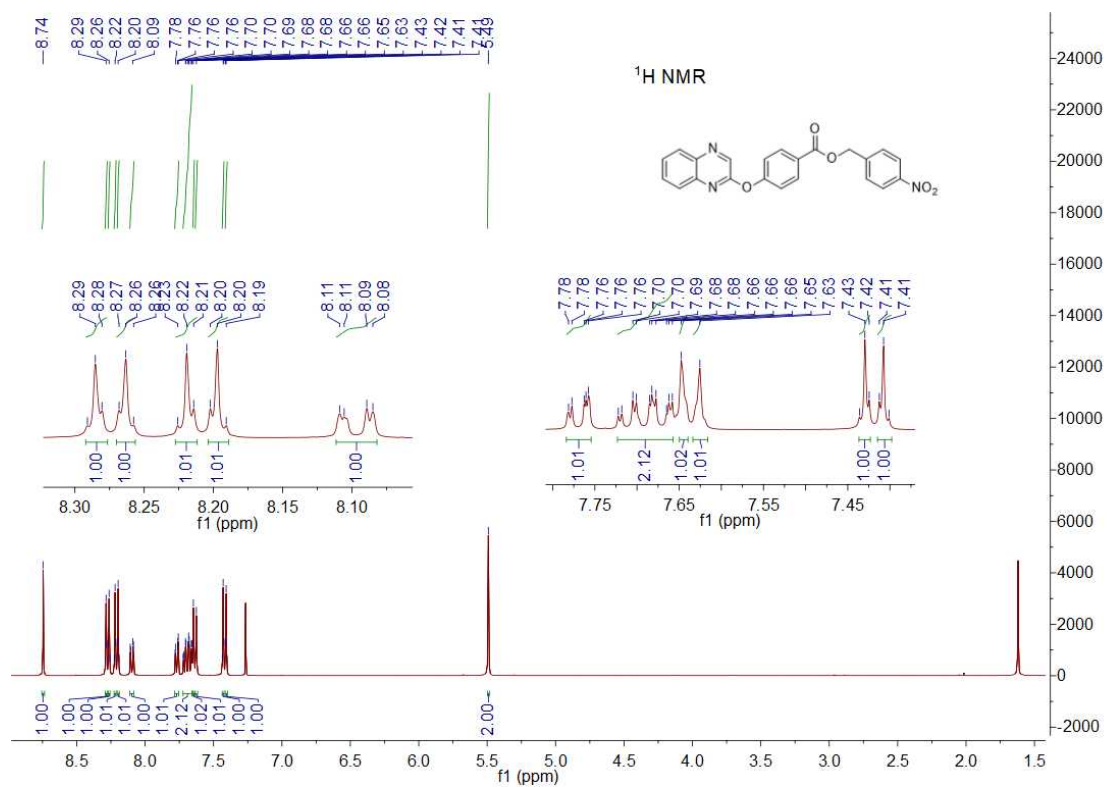

**<sup>1</sup>H NMR spectrum of compound **5b****

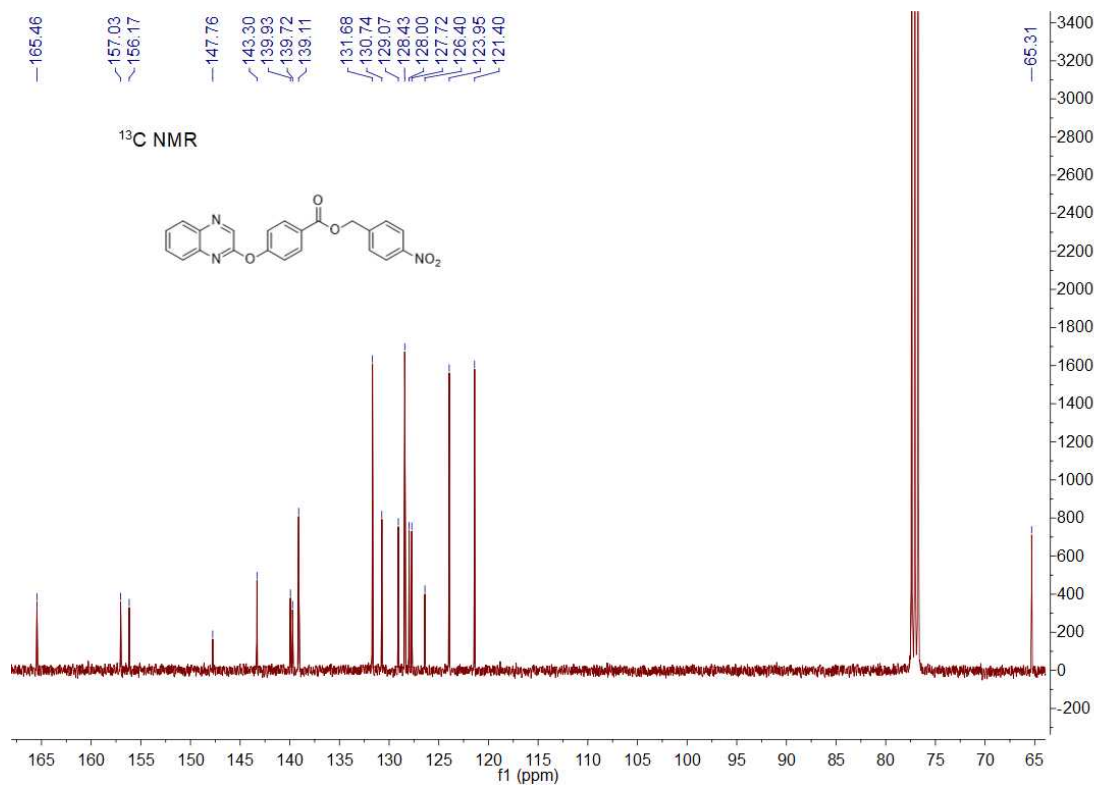

**<sup>13</sup>C NMR spectrum of compound **5b****

TXM-X-2 #80 RT: 0.36 AV: 1 NL: 7.54E3  
T: FTMS + p ESI Full ms [100.0000-1500.0000]

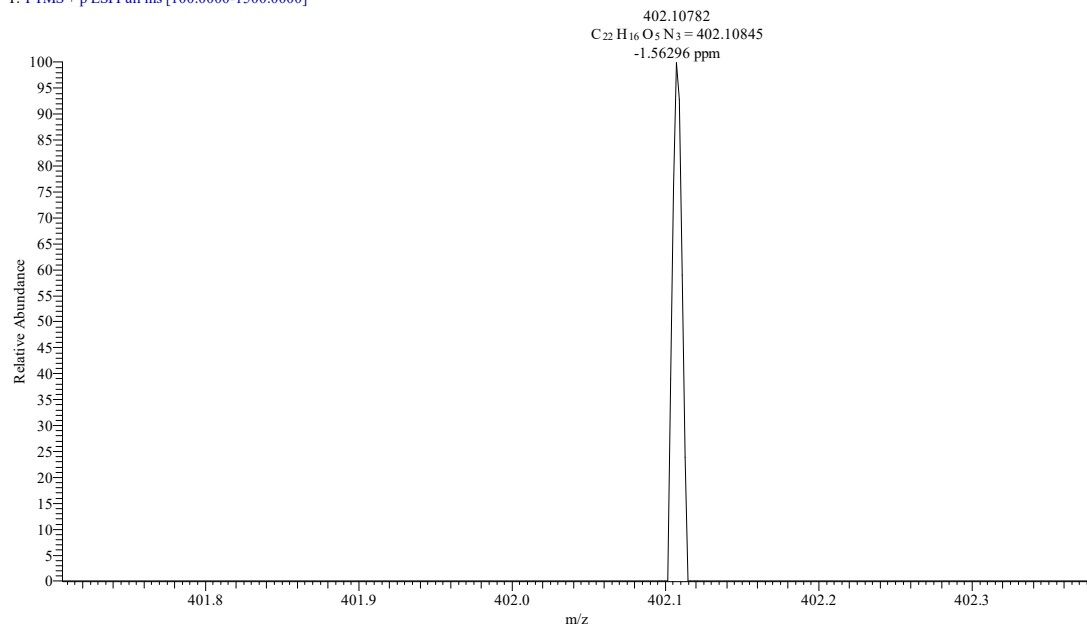

HRMS (ESI) spectrum of compound **5b**

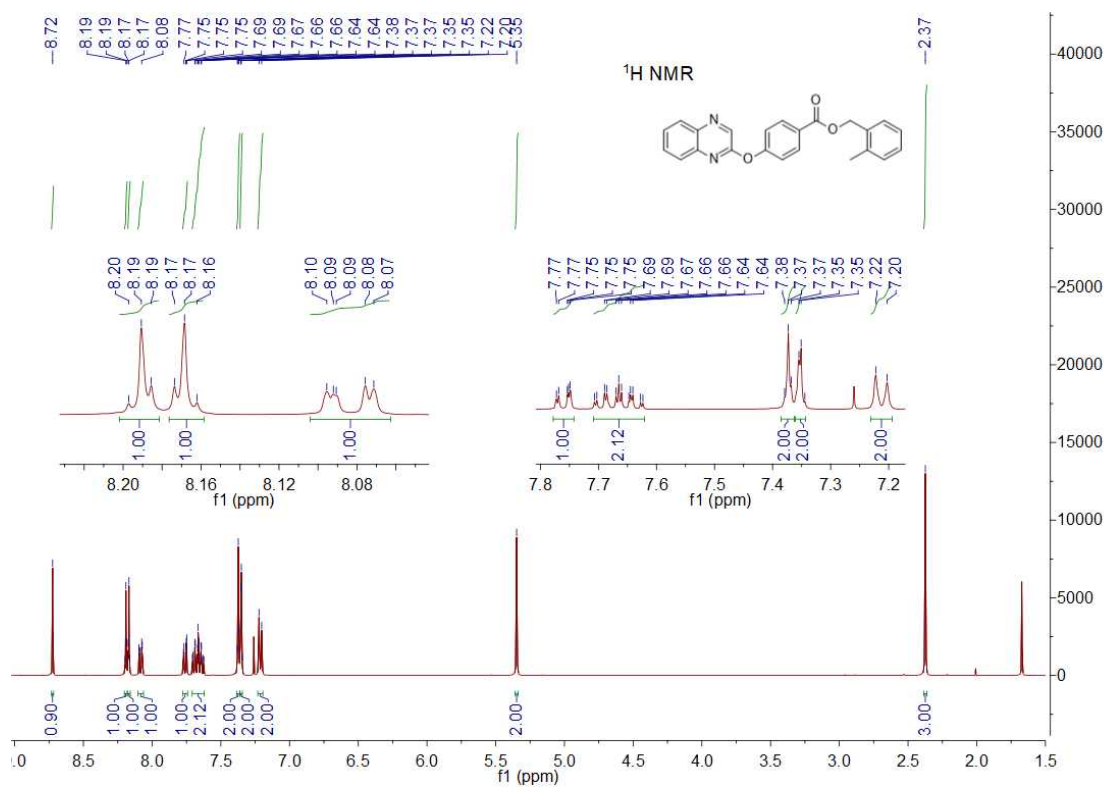

**<sup>1</sup>H NMR spectrum of compound 5c**

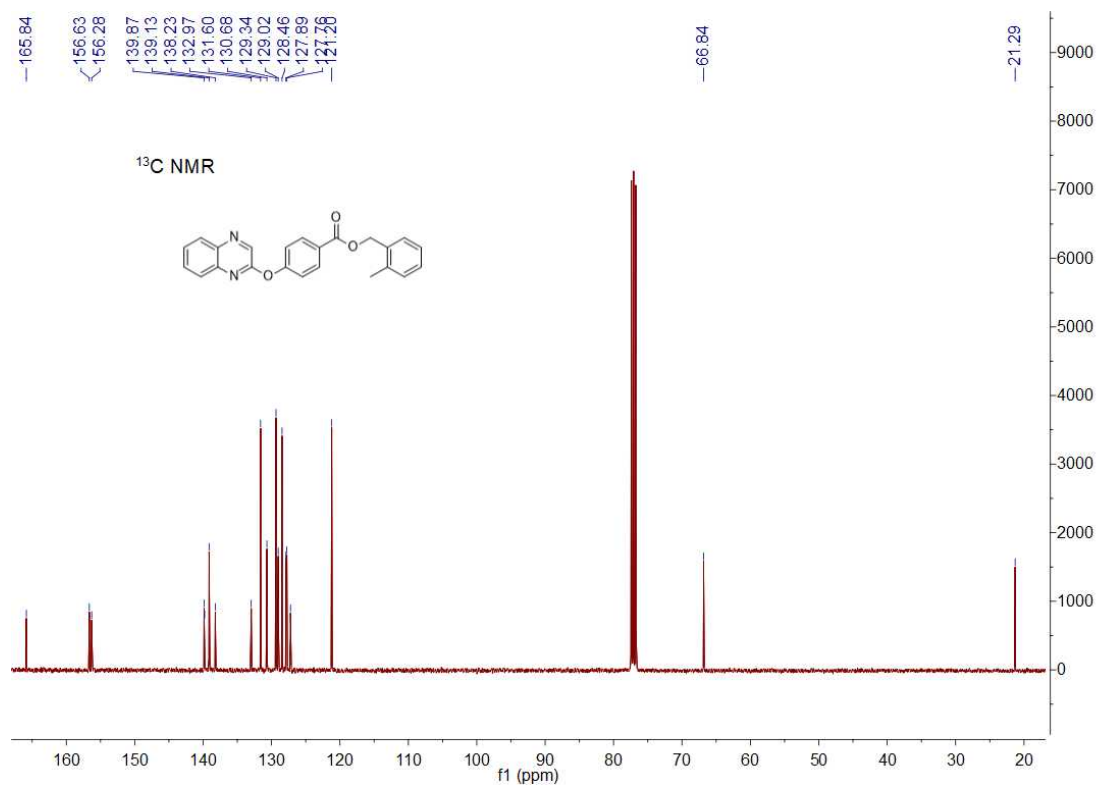

**<sup>13</sup>C NMR spectrum of compound 5c**

TXM-X-3 #14 RT: 0.06 AV: 1 NL: 3.92E6  
T: FTMS + p ESI Full ms [100.0000-1500.0000]

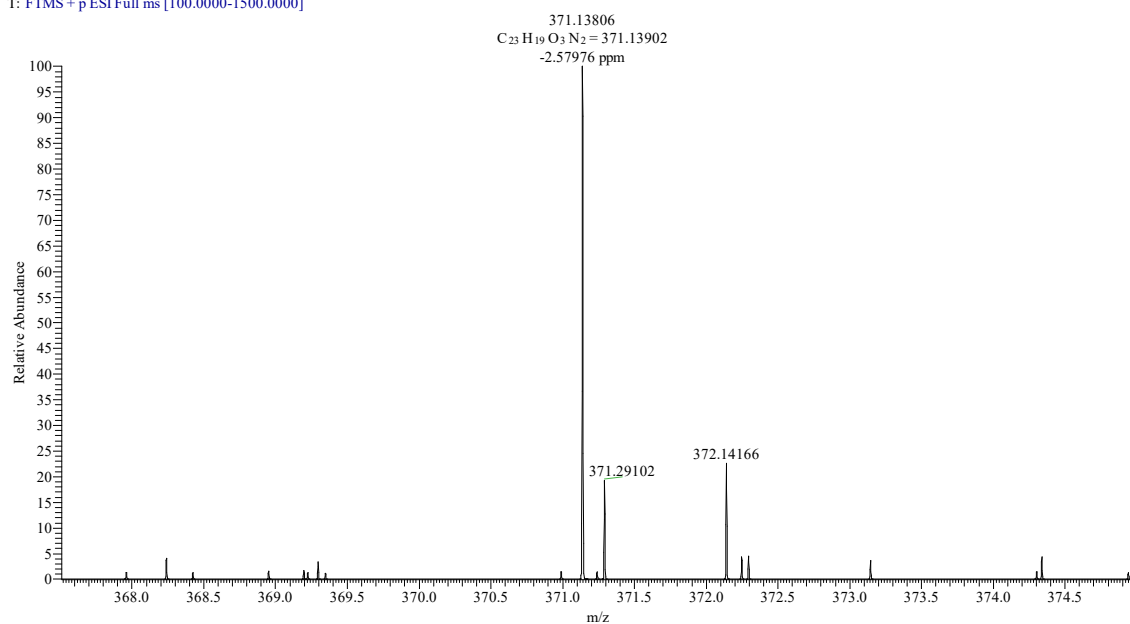

HRMS (ESI) spectrum of compound **5c**

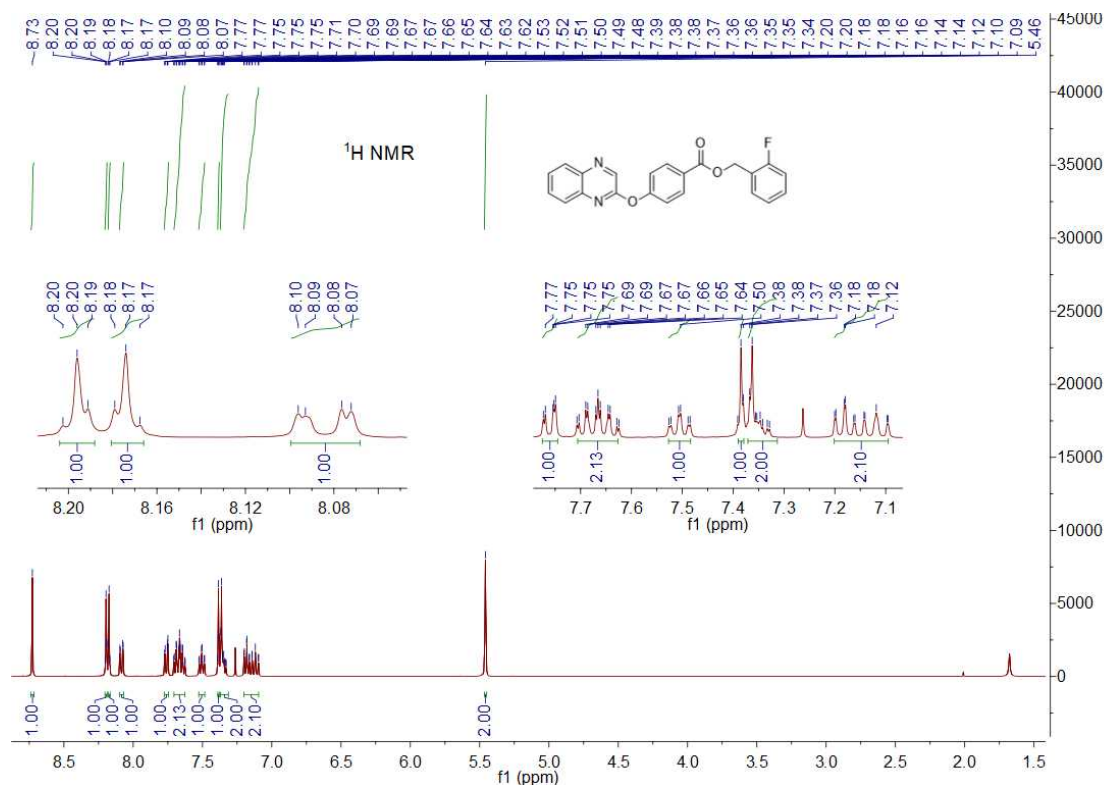

**<sup>1</sup>H NMR spectrum of compound 5d**

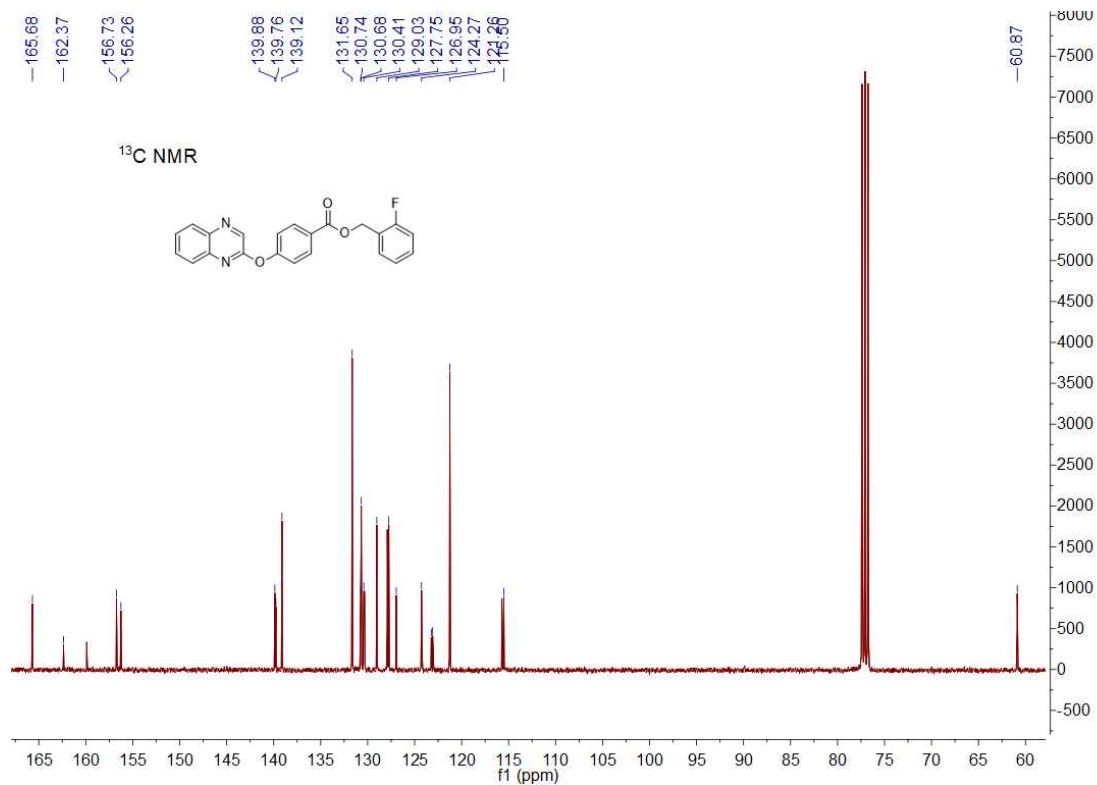

**<sup>13</sup>C NMR spectrum of compound 5d**



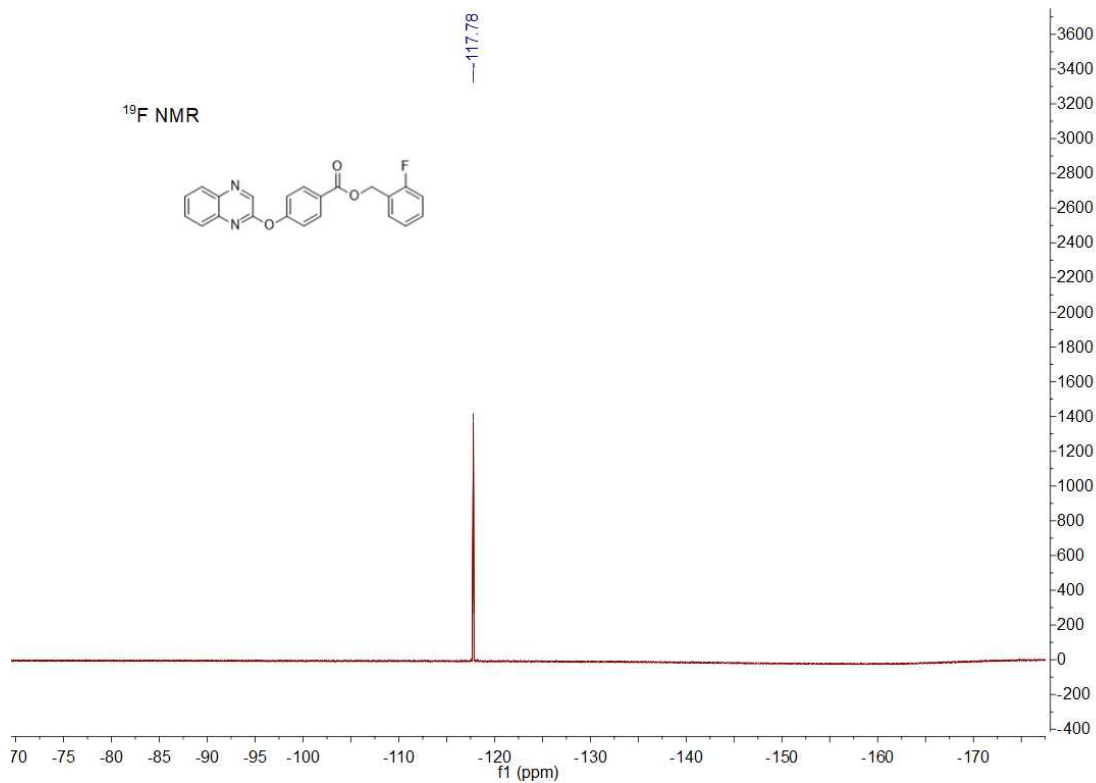

<sup>19</sup>F NMR spectrum of compound 5d

TXM-X-4 #13 RT: 0.06 AV: 1 NL: 1.24E6  
T: FTMS + p ESI Full ms [100.0000-1500.0000]

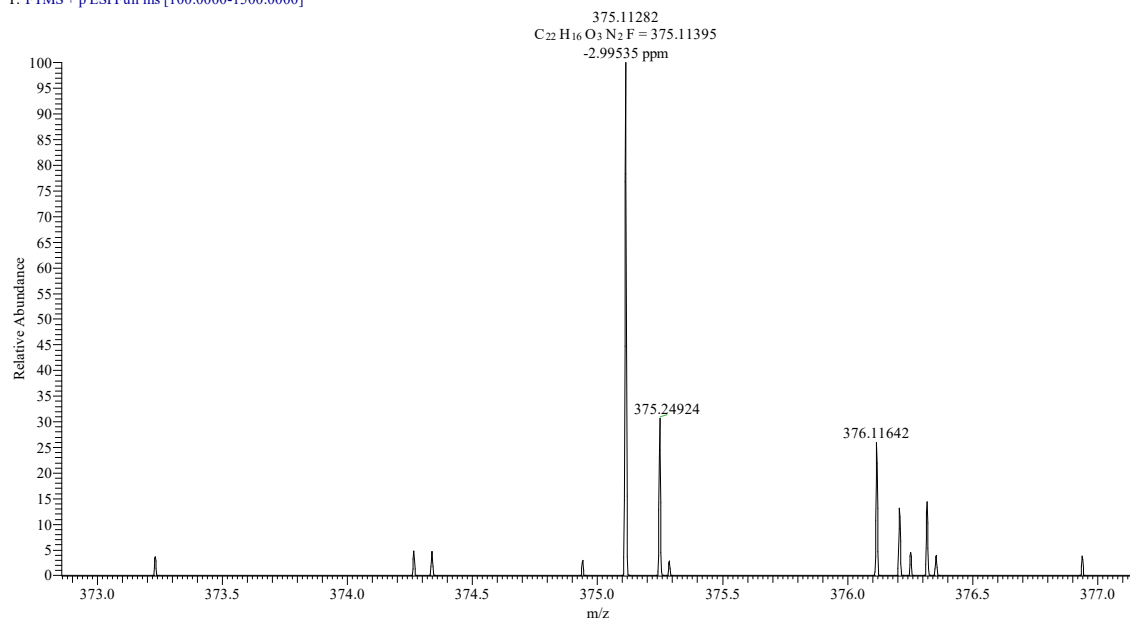

HRMS (ESI) spectrum of compound 5d

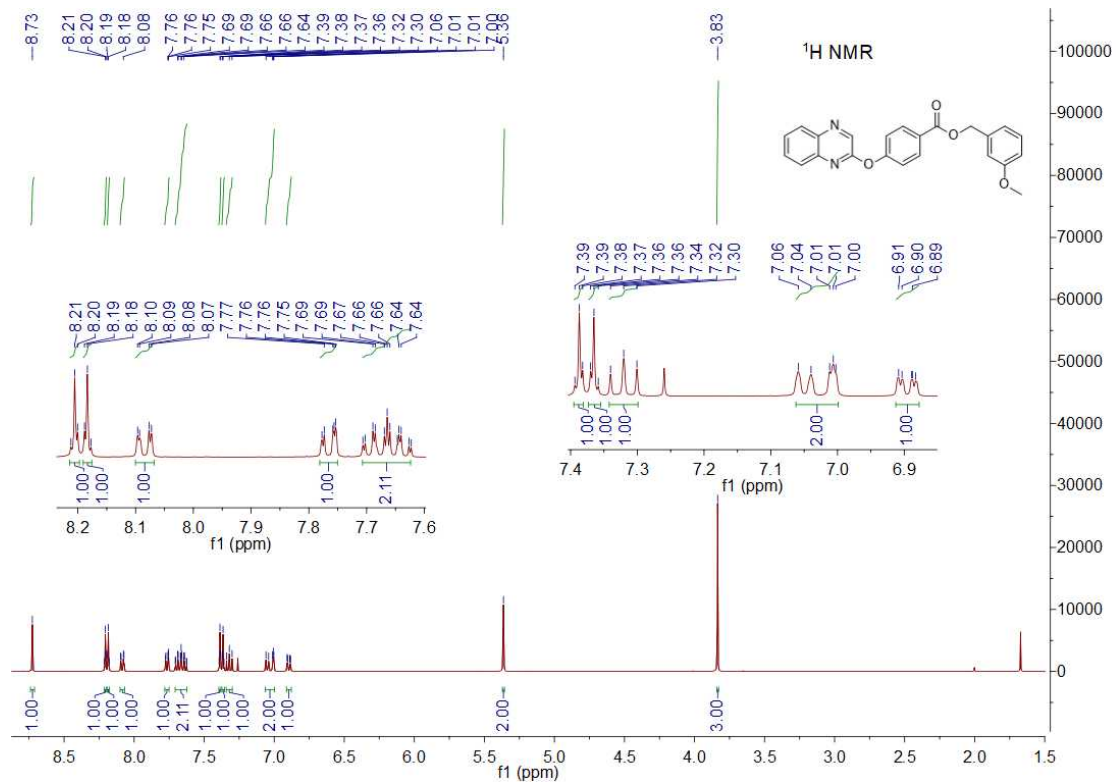

**<sup>1</sup>H NMR spectrum of compound 5e**

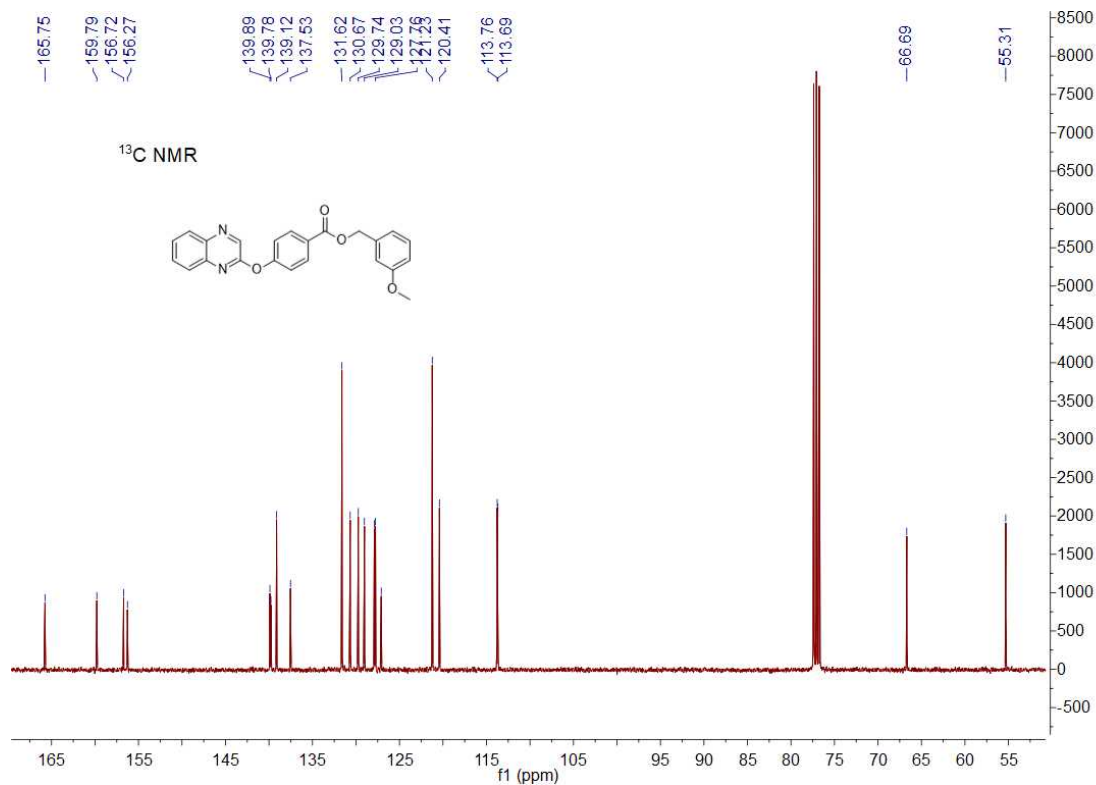

**<sup>13</sup>C NMR spectrum of compound 5e**

TXM-X-5 #46 RT: 0.20 AV: 1 NL: 8.10E6  
T: FTMS + p ESI Full ms [100.0000-1500.0000]

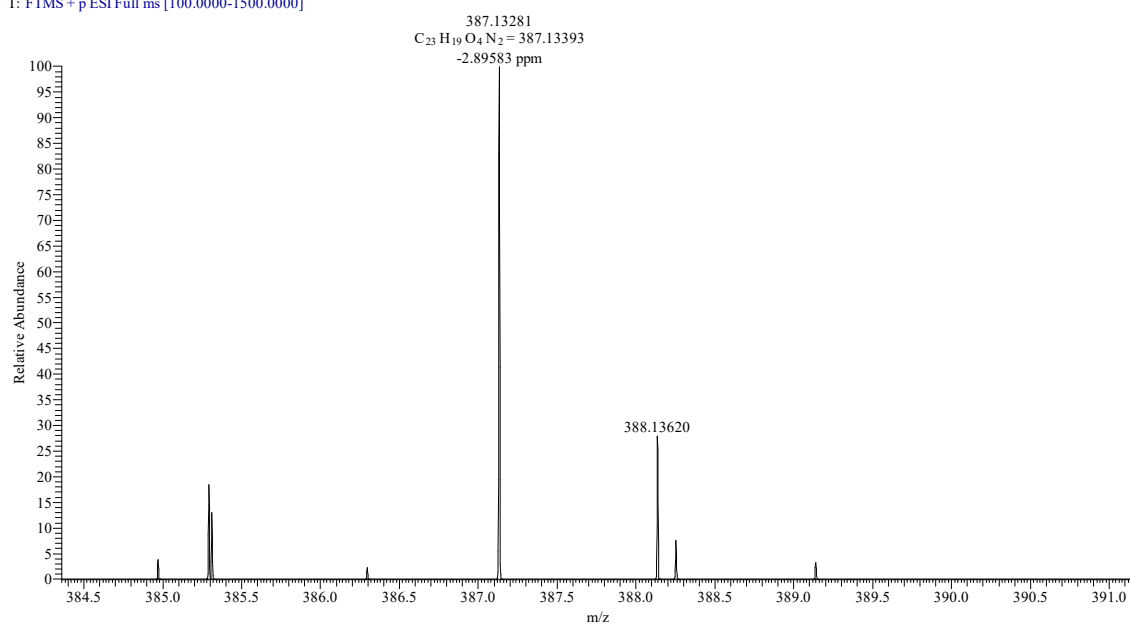

HRMS (ESI) spectrum of compound **5e**

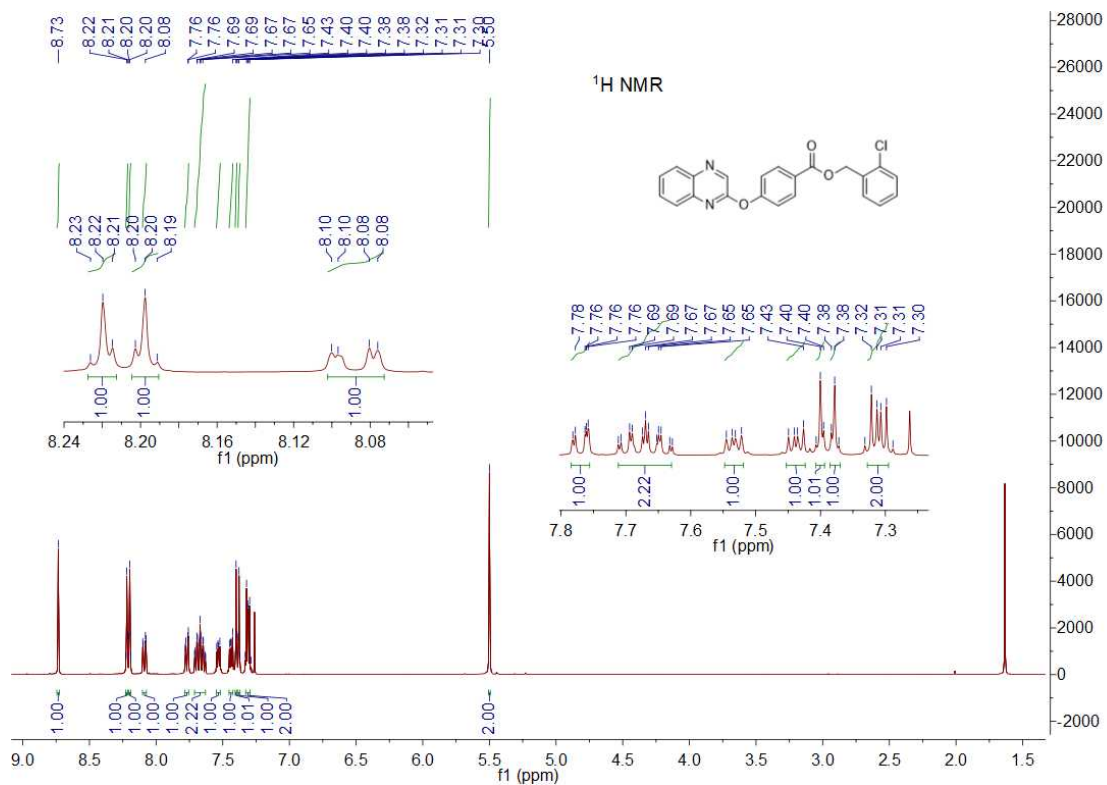

**<sup>1</sup>H NMR spectrum of compound 5f**

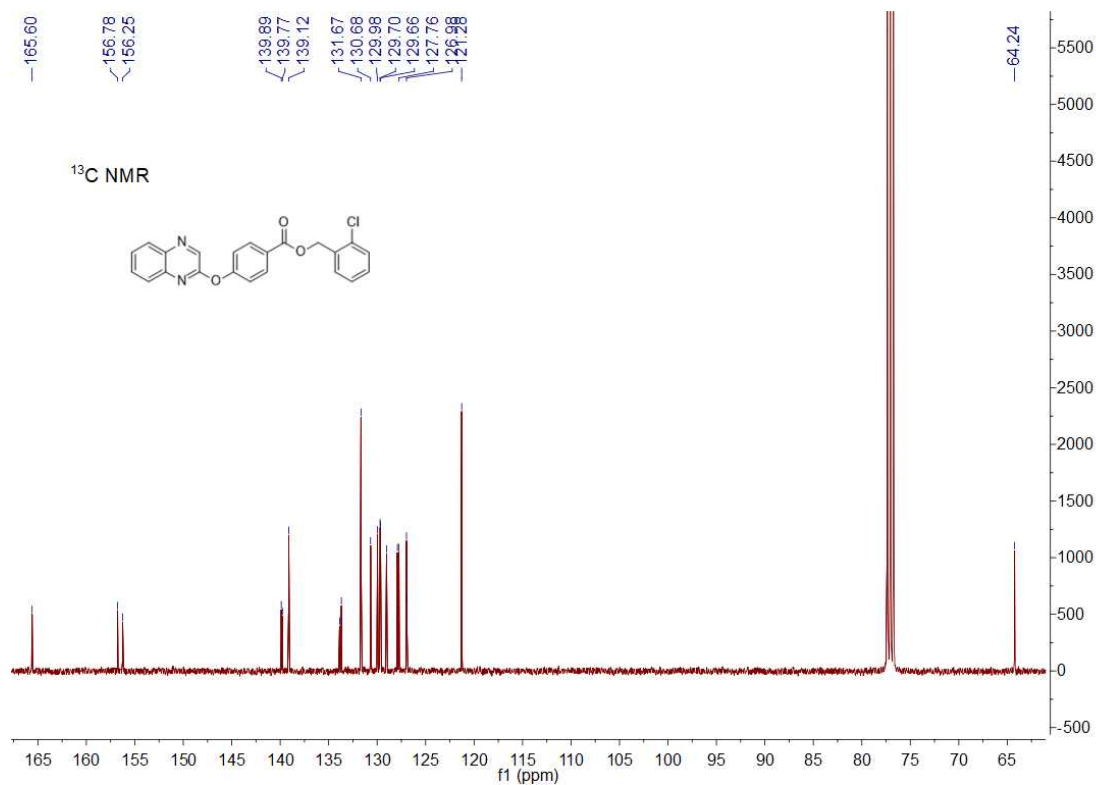

**<sup>13</sup>C NMR spectrum of compound 5f**

TXM-X-6 #19 RT: 0.08 AV: 1 NL: 1.54E8  
T: FTMS + p ESI Full ms [100.0000-1500.0000]

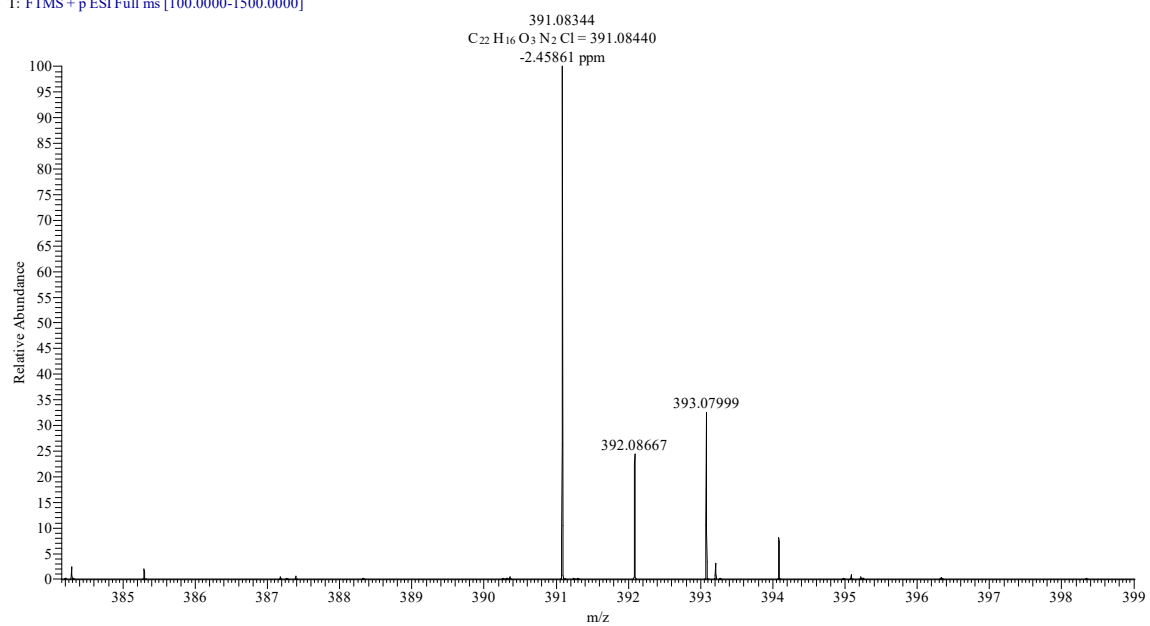

HRMS (ESI) spectrum of compound **5f**

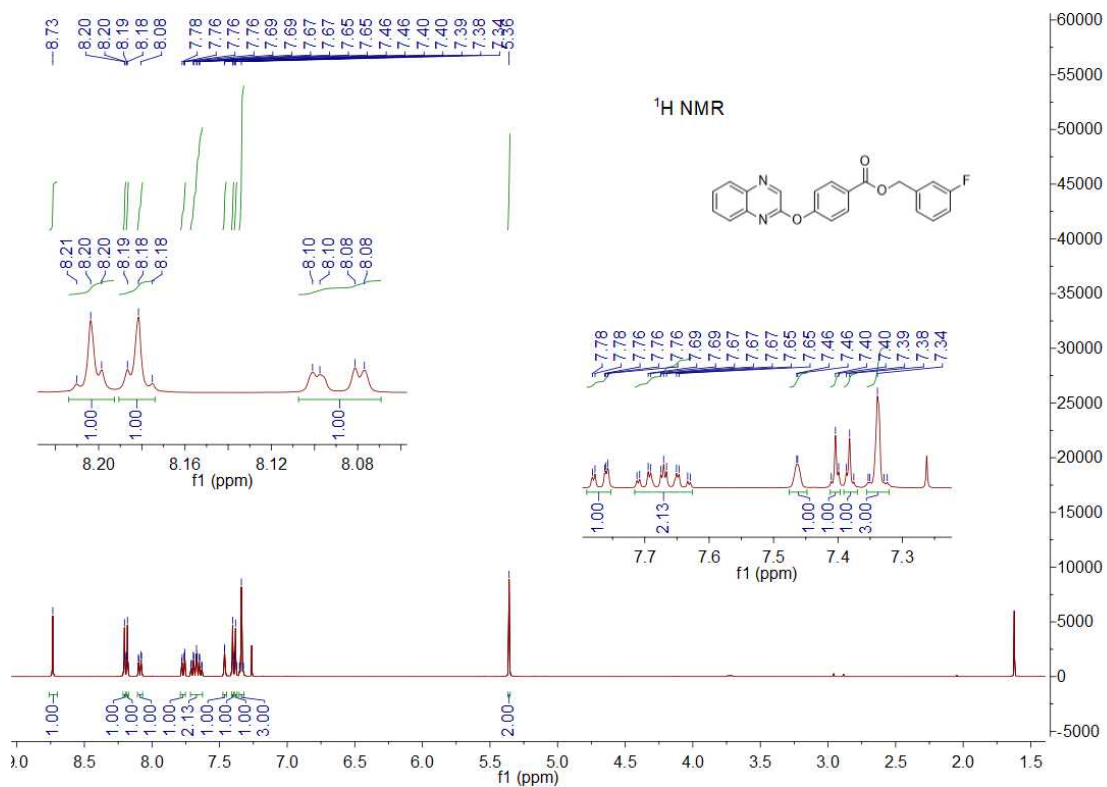

<sup>1</sup>H NMR spectrum of compound 5g

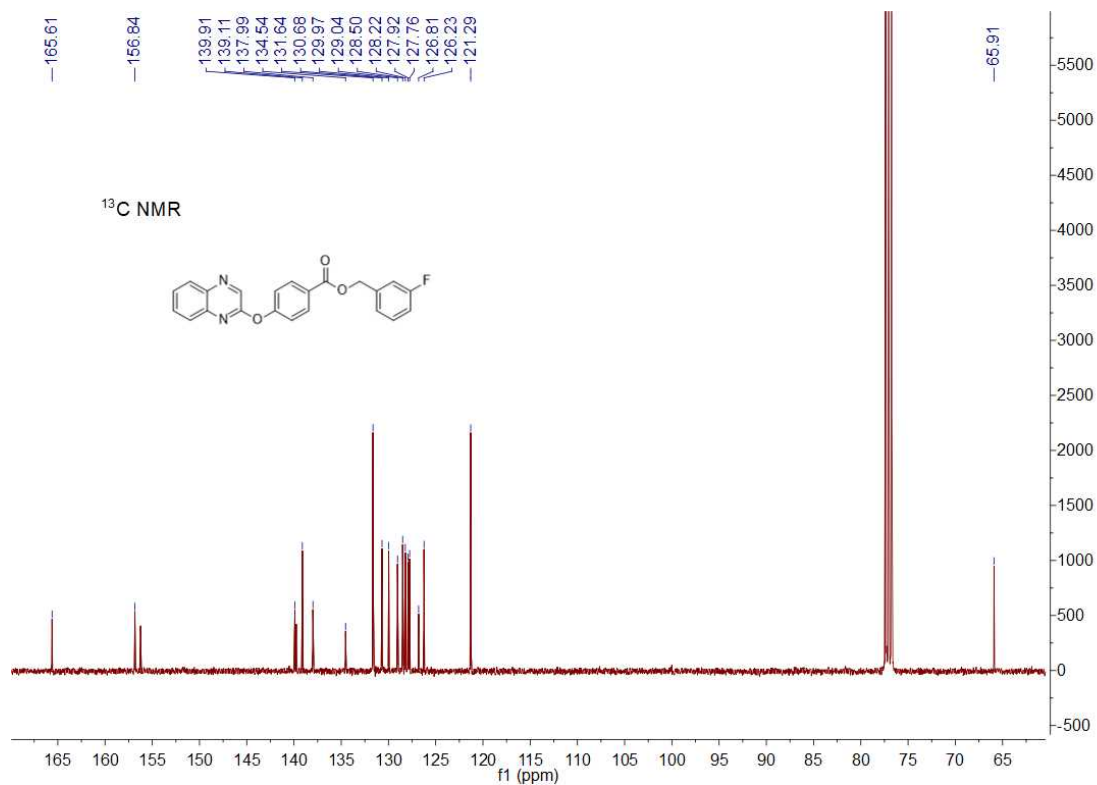

<sup>13</sup>C NMR spectrum of compound 5g

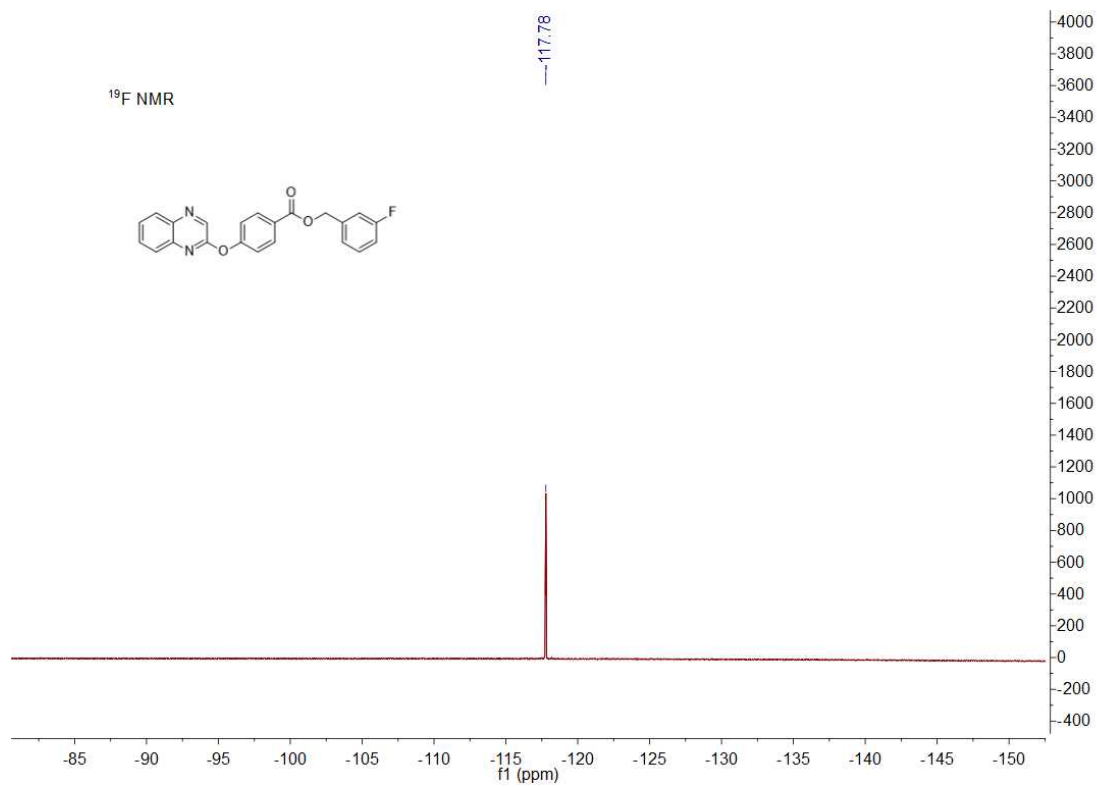

<sup>19</sup>F NMR spectrum of compound 5g

bm-x-7 #7 RT: 0.08 AV: 1 NL: 4.61E4  
T: FTMS + p ESI Full ms [150.0000-2200.0000]

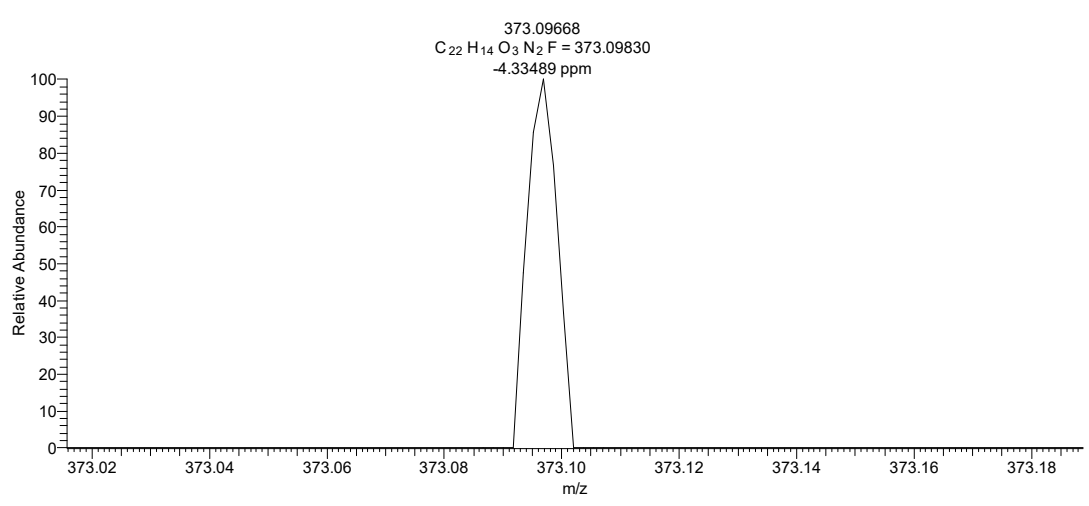

HRMS (ESI) spectrum of compound 5g

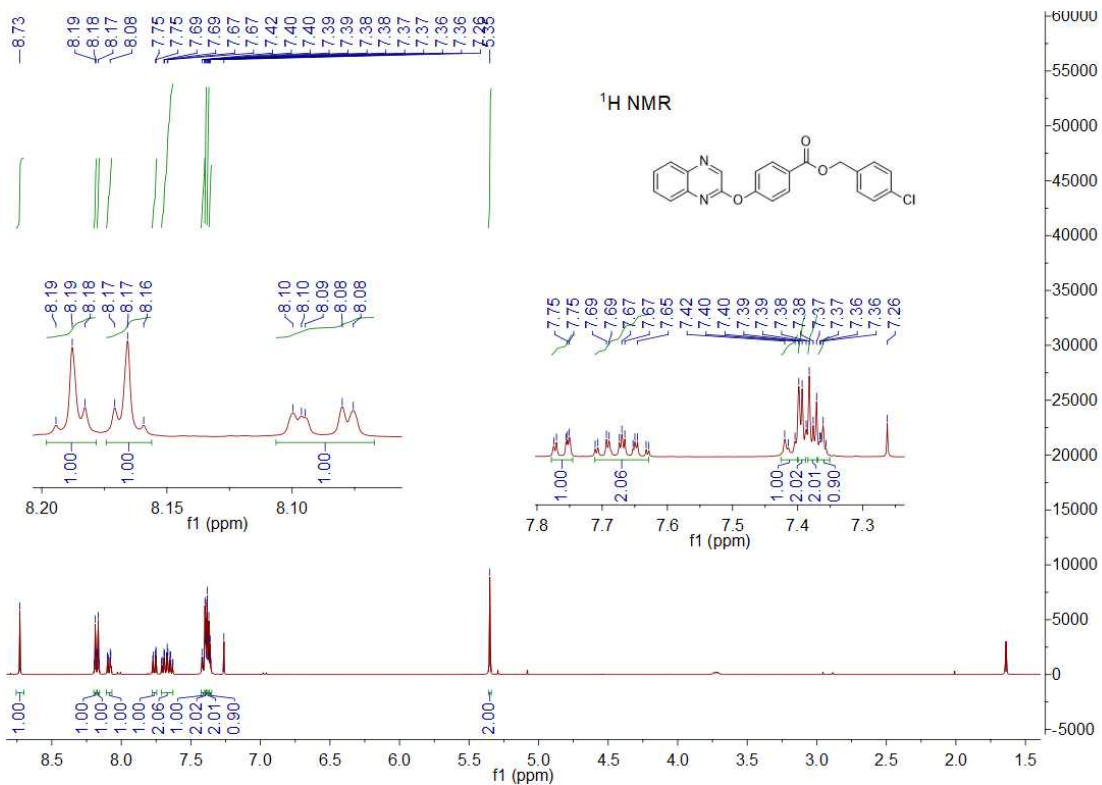

**<sup>1</sup>H NMR spectrum of compound 5h**

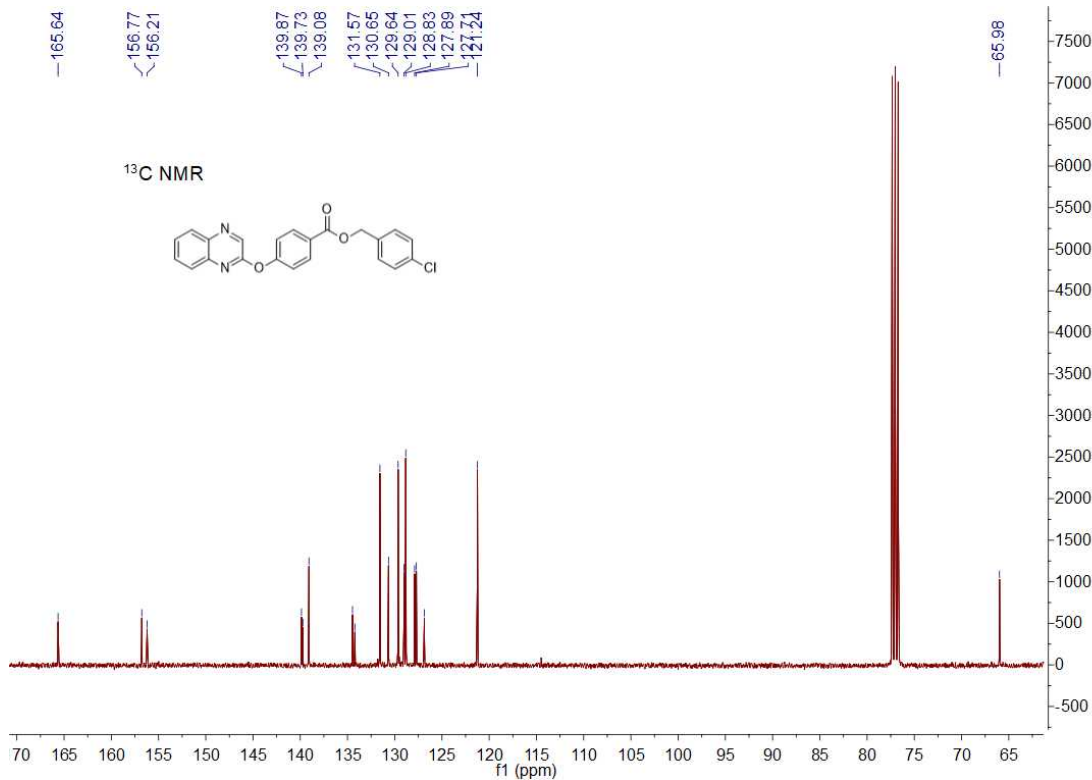

**<sup>13</sup>C NMR spectrum of compound 5h**



TXM-X-8 #22 RT: 0.10 AV: 1 NL: 1.80E7  
T: FTMS + p ESI Full ms [100.0000-1500.0000]

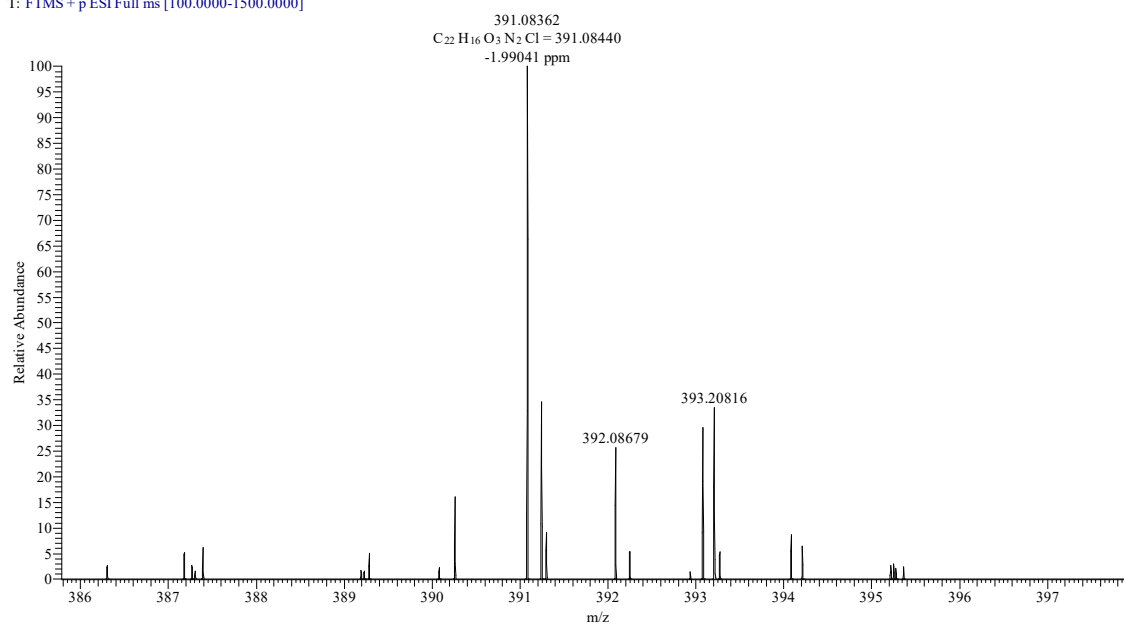

HRMS (ESI) spectrum of compound **5h**

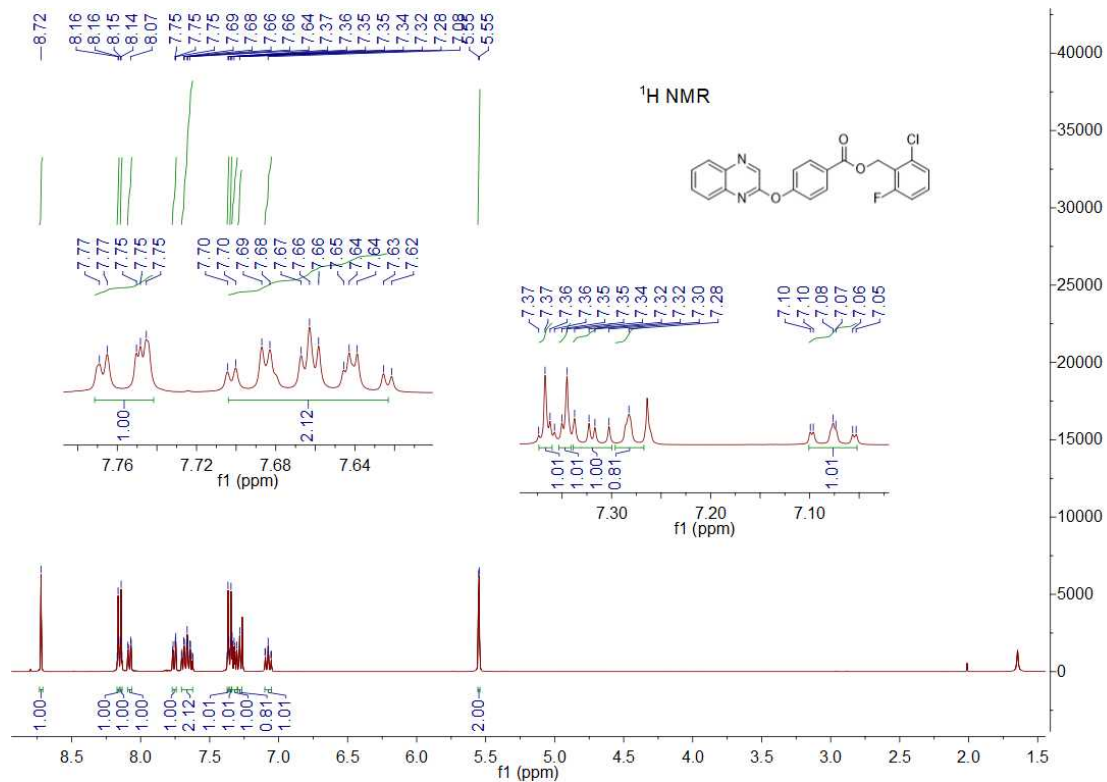

**<sup>1</sup>H NMR spectrum of compound **5i****

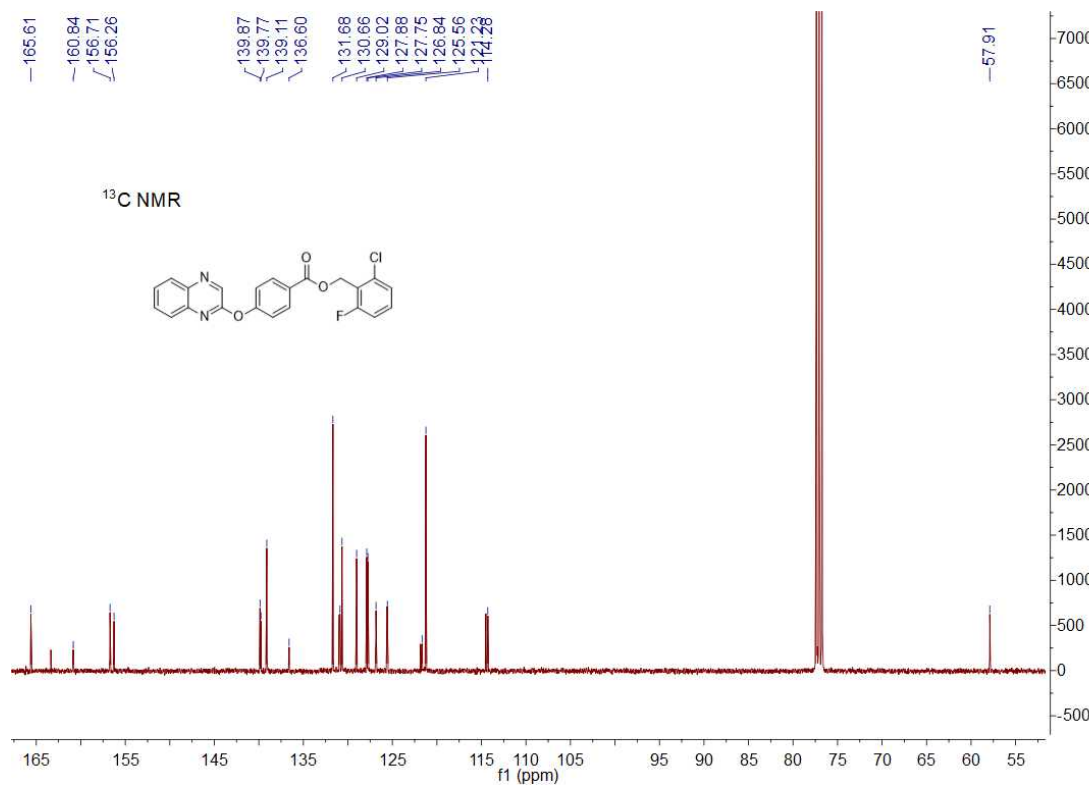

**<sup>13</sup>C NMR spectrum of compound **5i****

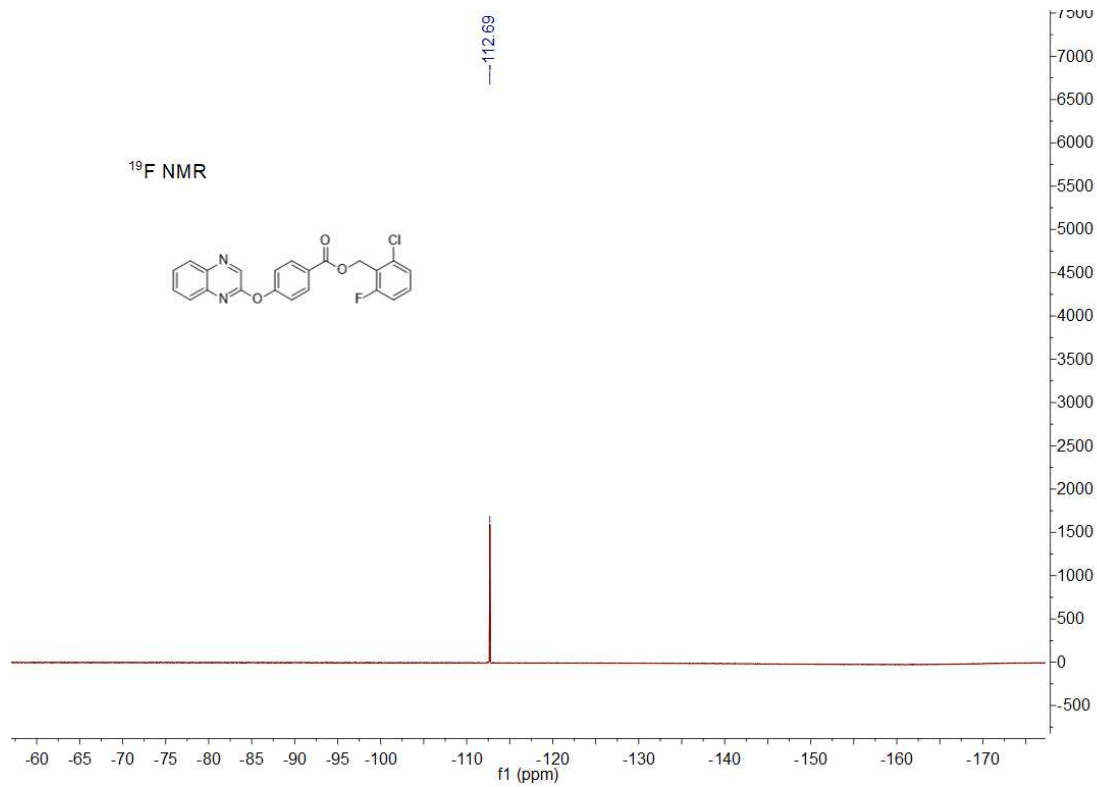

<sup>19</sup>F NMR spectrum of compound **5i**

TXM-X-9 #42 RT: 0.18 AV: 1 NL: 3.77E6  
T: FTMS + p ESI Full ms [100.0000-1500.0000]

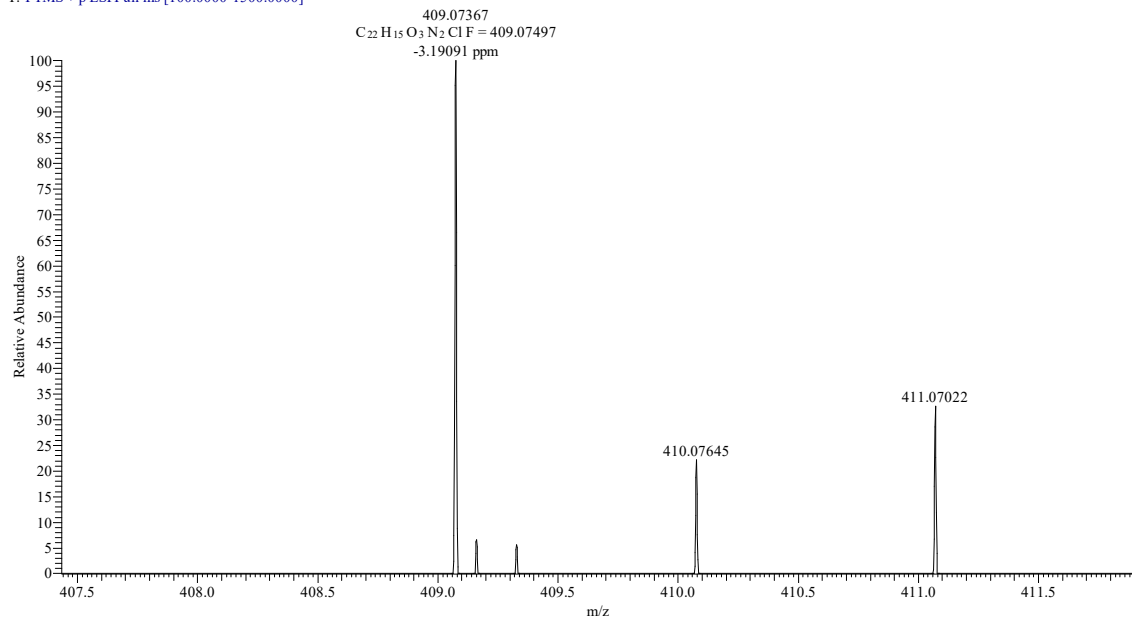

HRMS (ESI) spectrum of compound **5i**



TXM-X-10 #26 RT: 0.11 AV: 1 NL: 6.72E6  
T: FTMS + p ESI Full ms [100.0000-1500.0000]

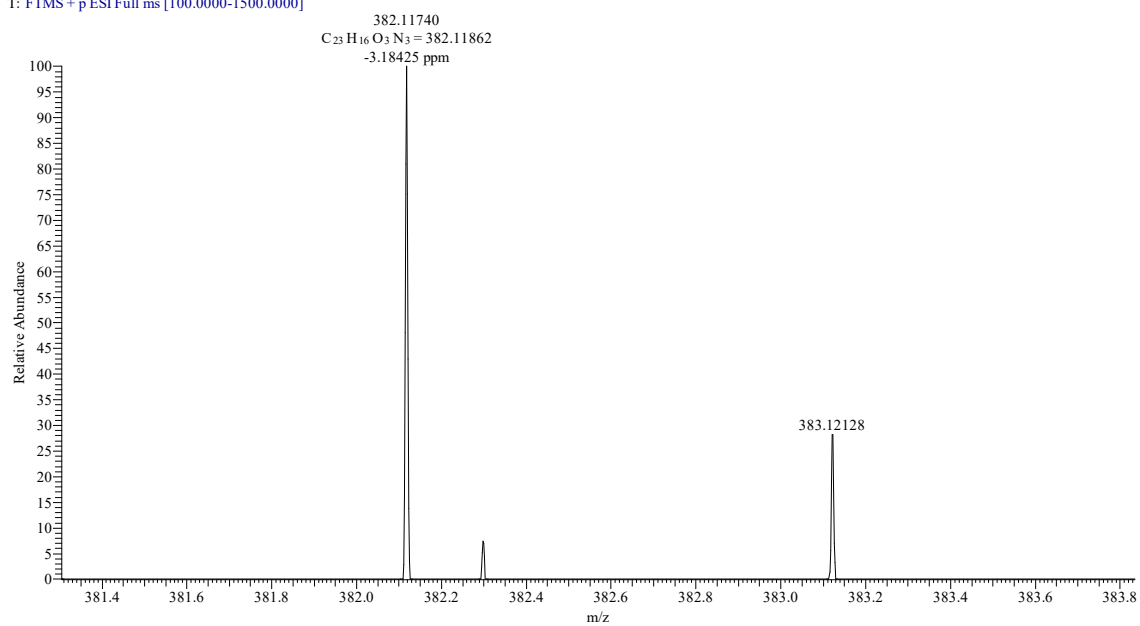

HRMS (ESI) spectrum of compound 5j

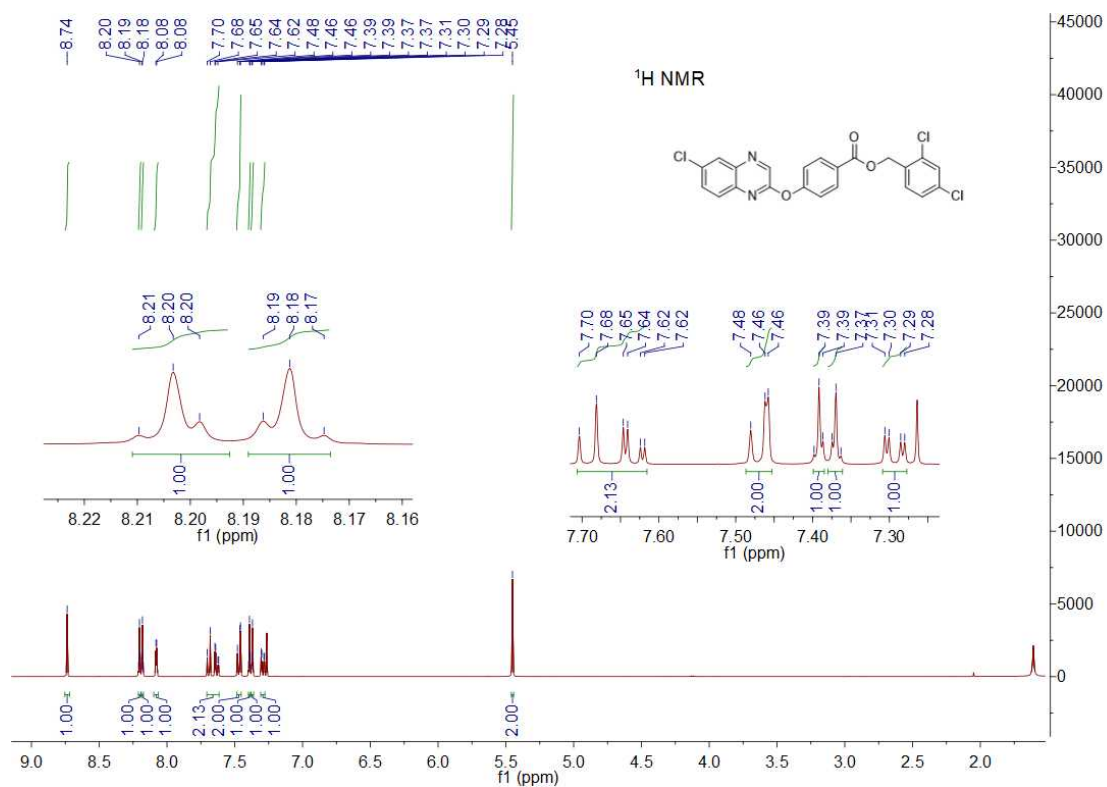

**<sup>1</sup>H NMR spectrum of compound 5k**

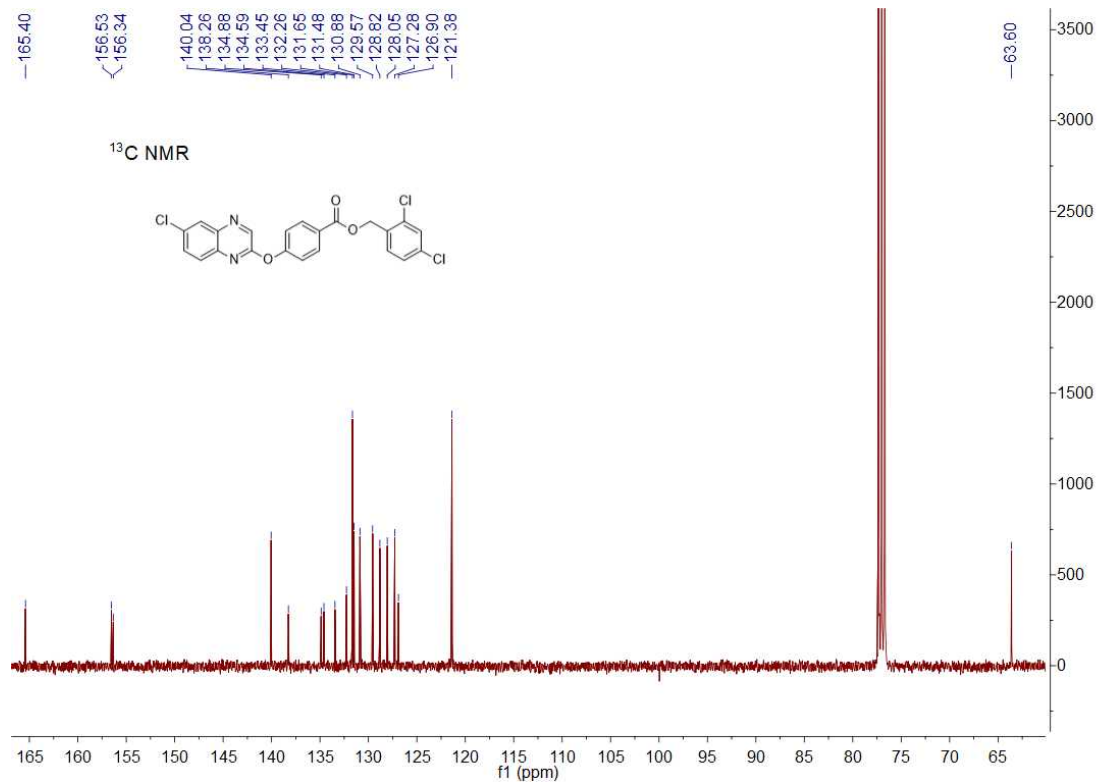

**<sup>13</sup>C NMR spectrum of compound 5k**

TXM-X-11 #38 RT: 0.17 AV: 1 NL: 3.20E5  
T: FTMS + p ESI Full ms [100.0000-1500.0000]

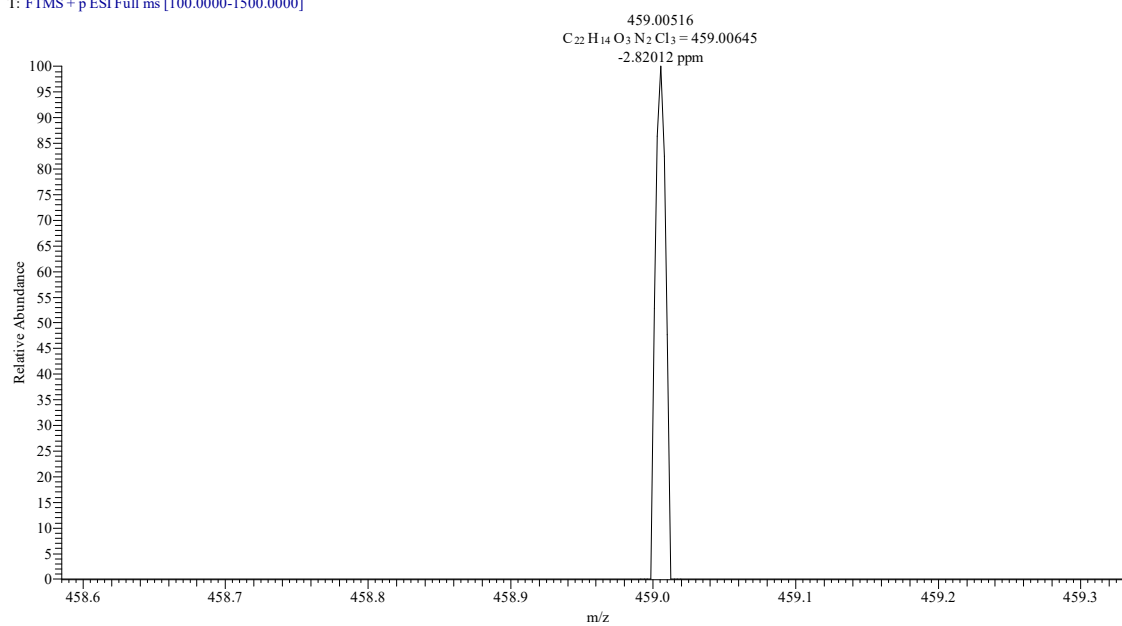

HRMS (ESI) spectrum of compound **5k**

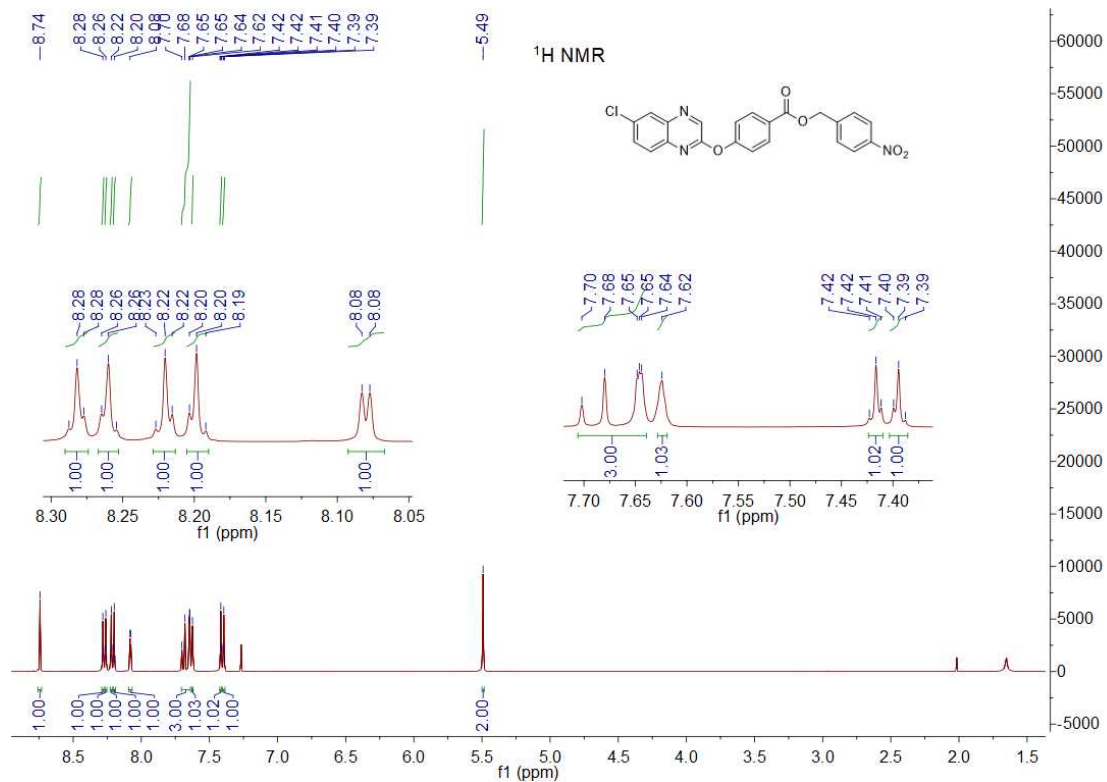

**<sup>1</sup>H NMR spectrum of compound 5I**

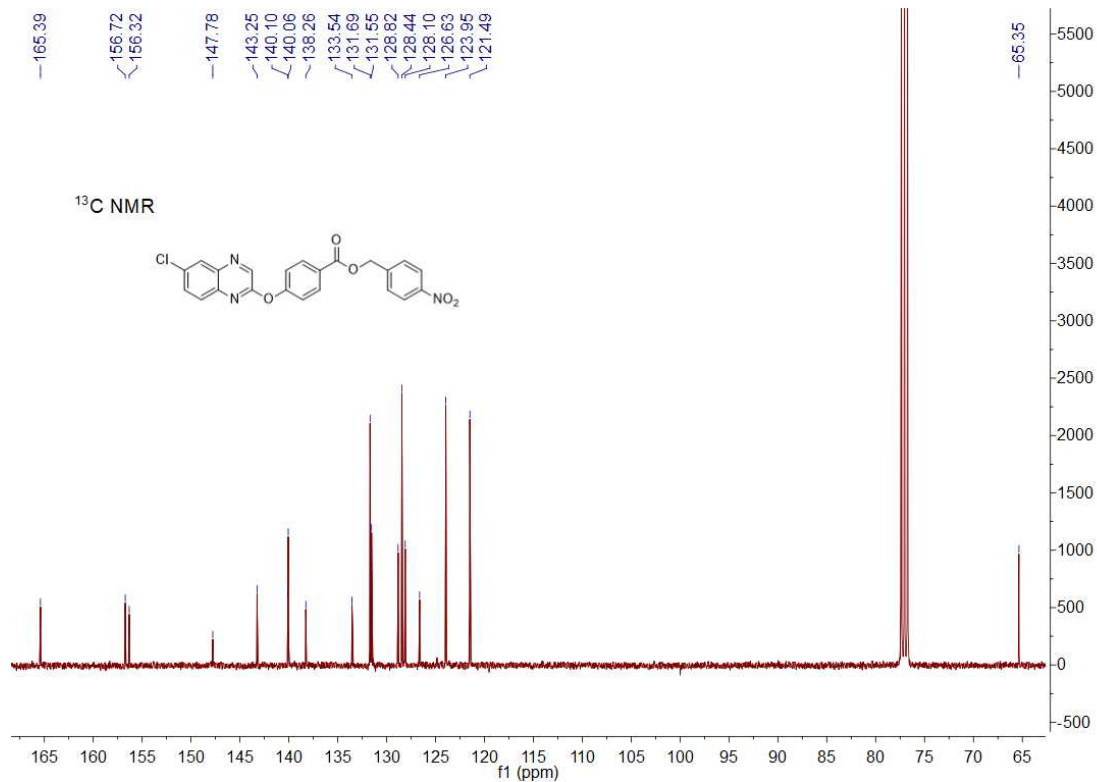

**<sup>13</sup>C NMR spectrum of compound 5I**



TXM-X-12 #26 RT: 0.11 AV: 1 NL: 6.84E5  
T: FTMS + p ESI Full ms [100.0000-1500.0000]

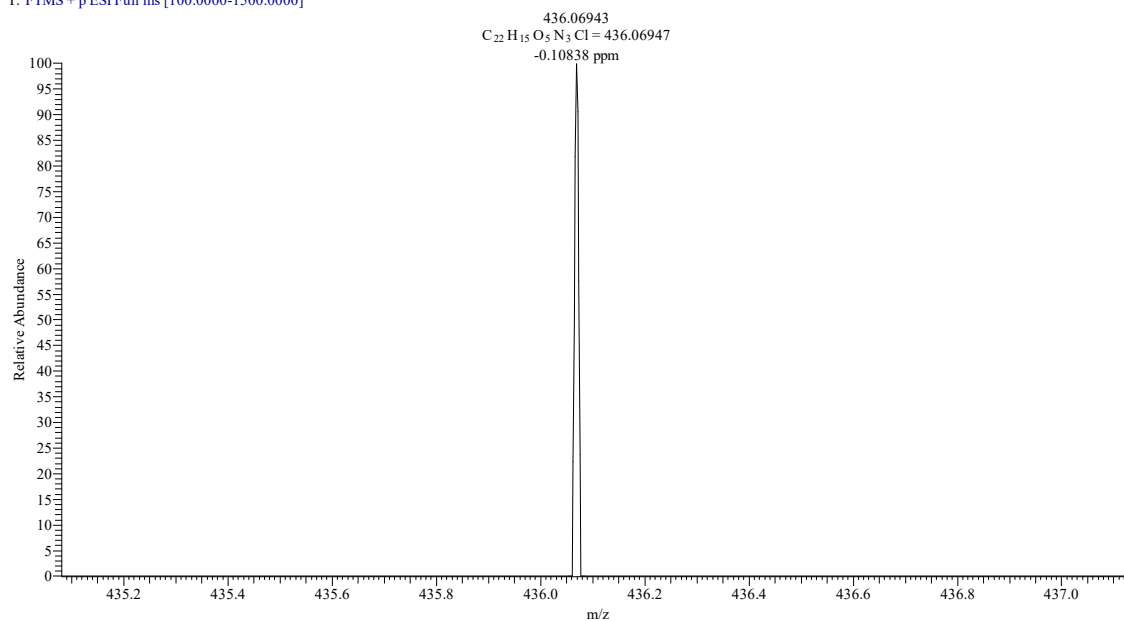

HRMS (ESI) spectrum of compound **5I**

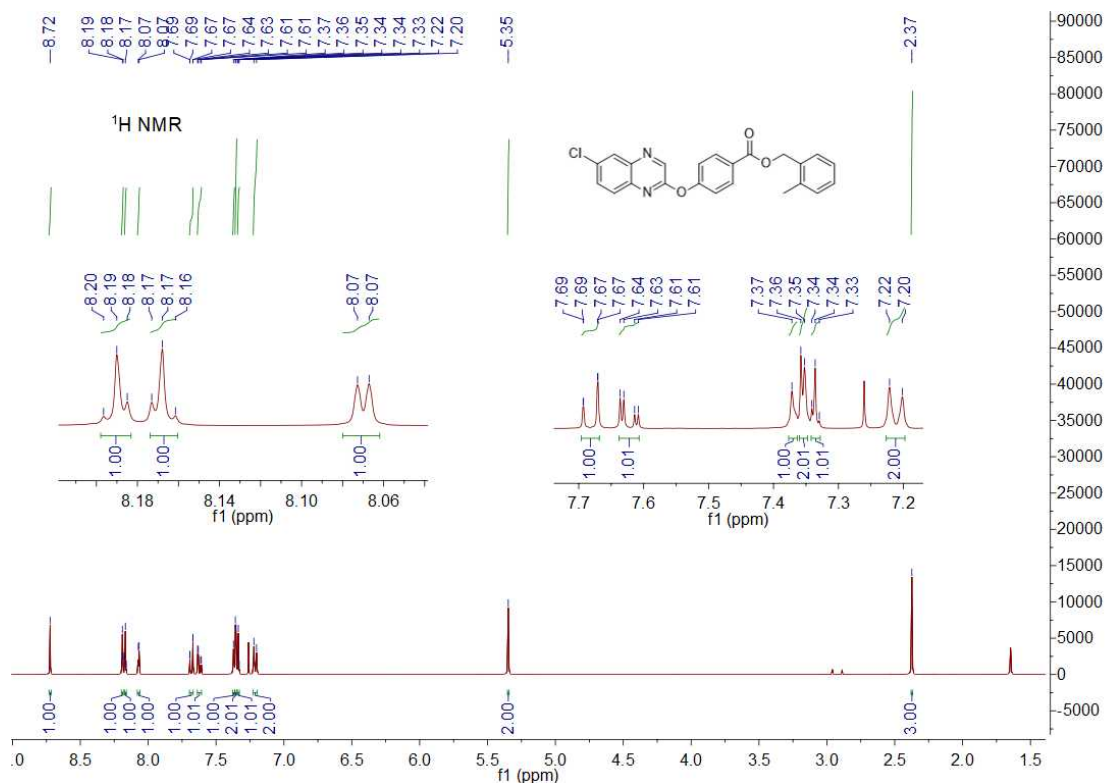

**<sup>1</sup>H NMR spectrum of compound 5m**

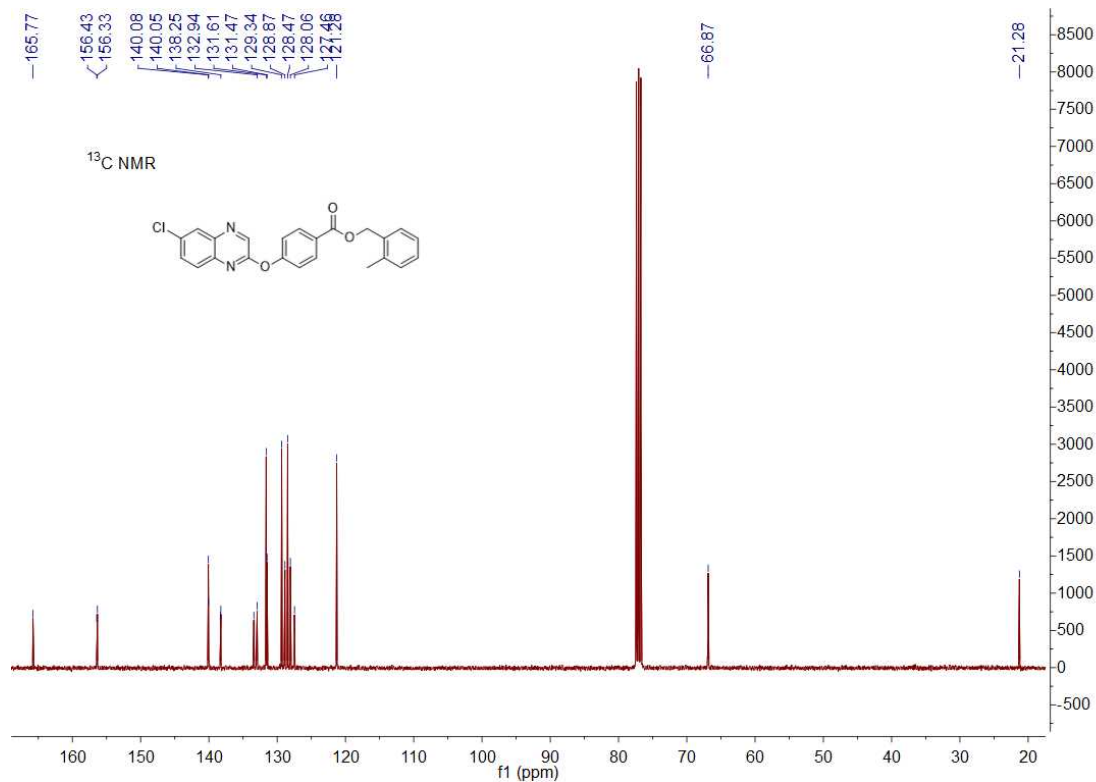

**<sup>13</sup>C NMR spectrum of compound 5m**

TXM-X-13 #26 RT: 0.11 AV: 1 NL: 2.77E6  
T: FTMS + p ESI Full ms [100.0000-1500.0000]

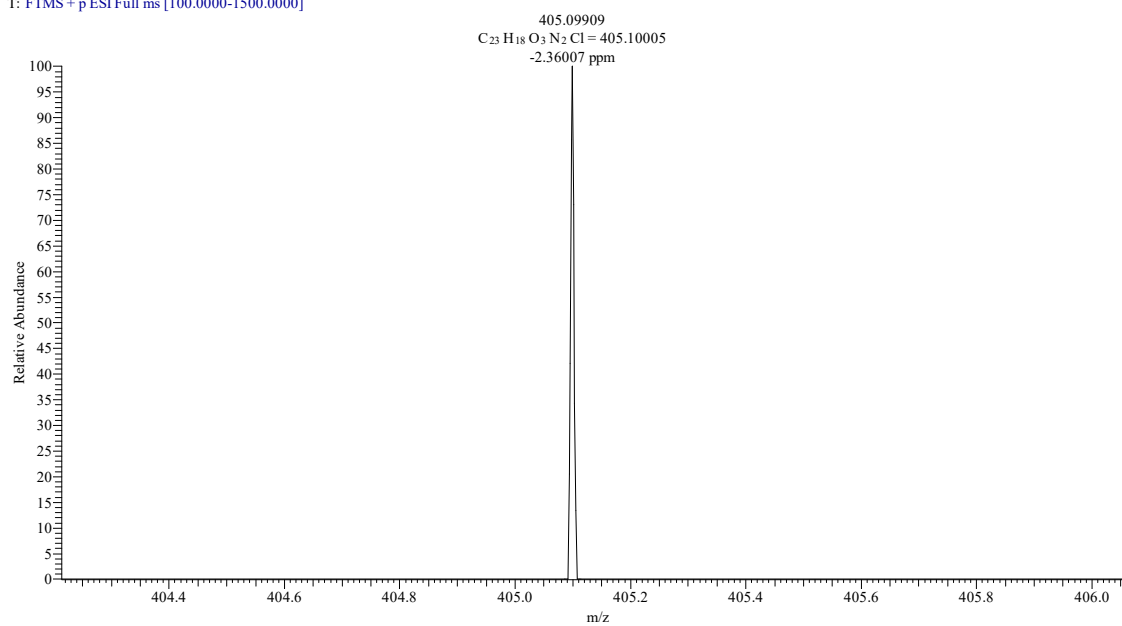

HRMS (ESI) spectrum of compound **5m**

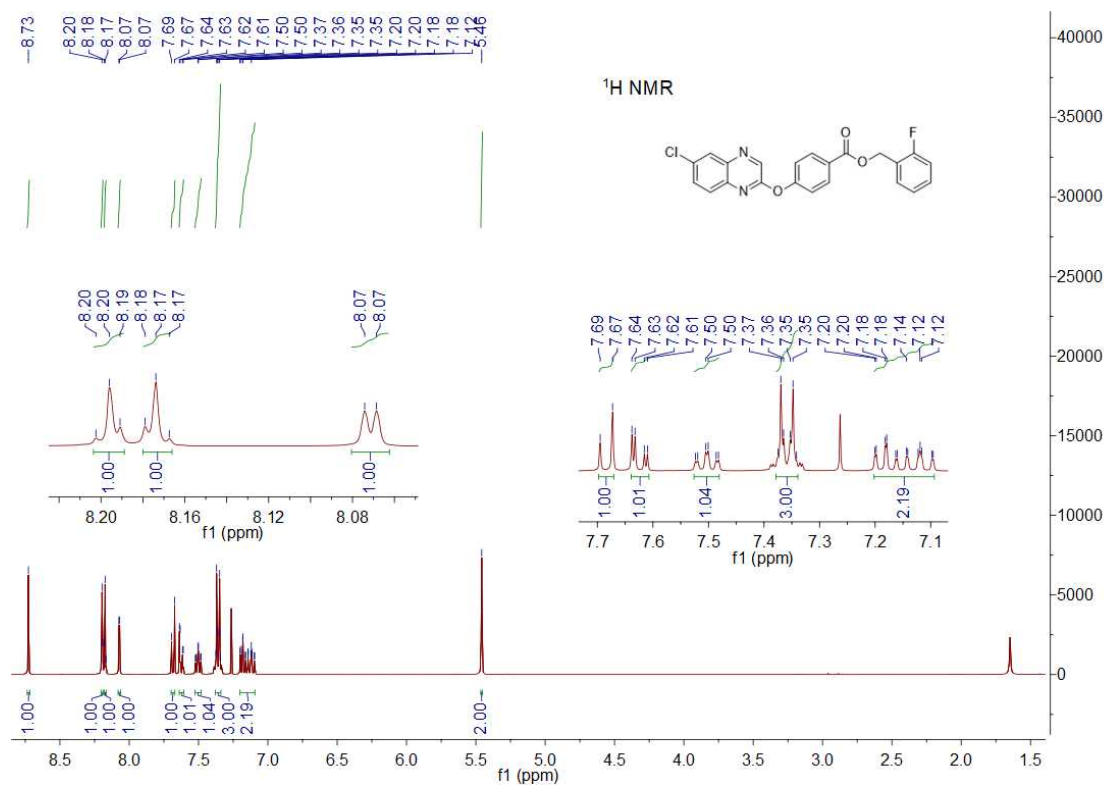

**<sup>1</sup>H NMR spectrum of compound 5n**

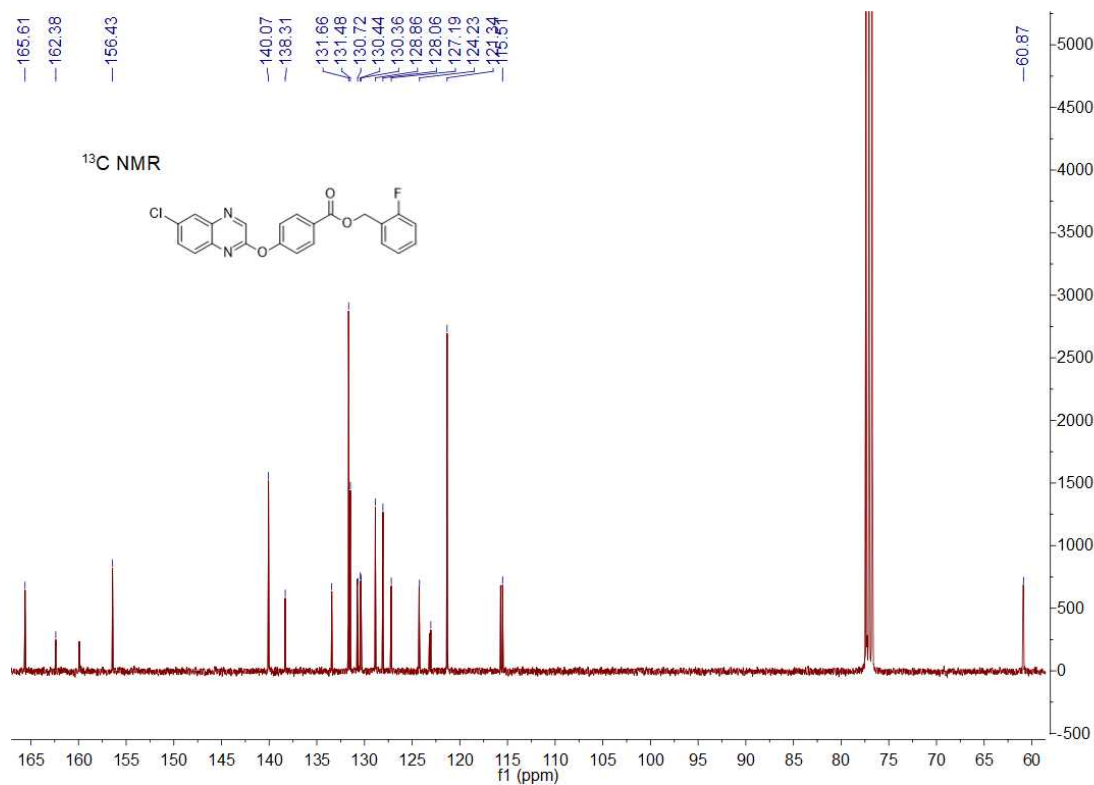

**<sup>13</sup>C NMR spectrum of compound 5n**

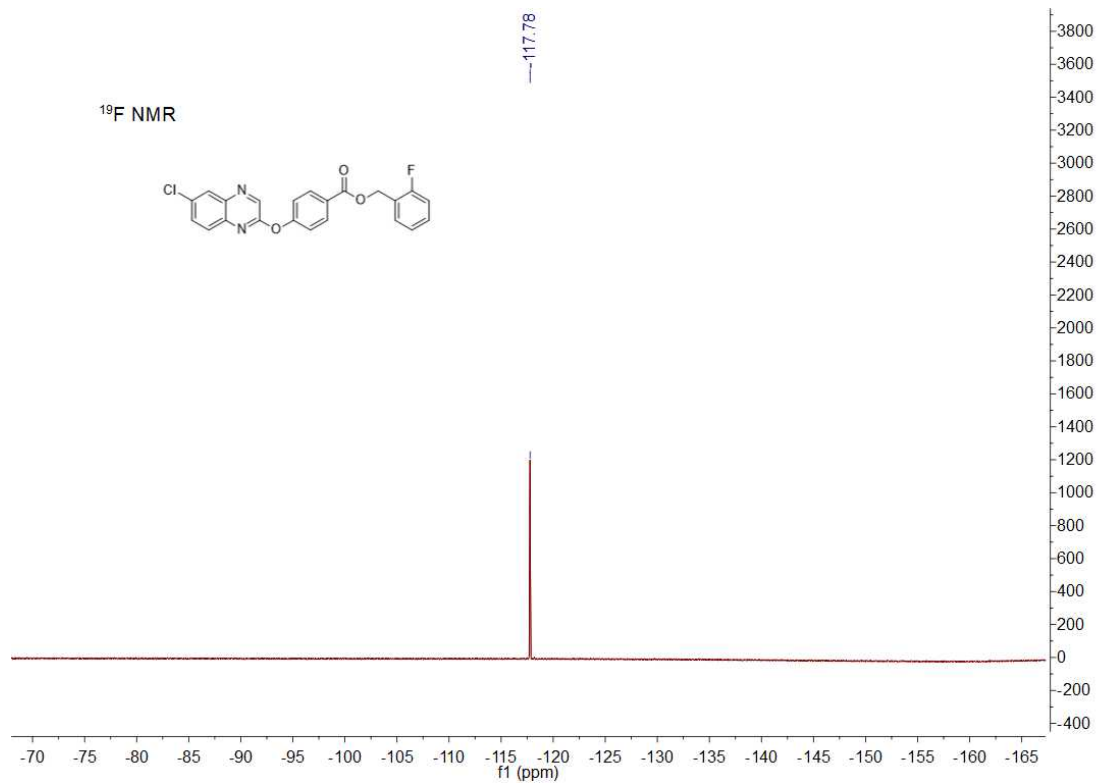

<sup>19</sup>F NMR spectrum of compound 5n

TXM-X-14 #31 RT: 0.14 AV: 1 NL: 1.50E6  
T: FTMS + p ESI Full ms [100.0000-1500.0000]

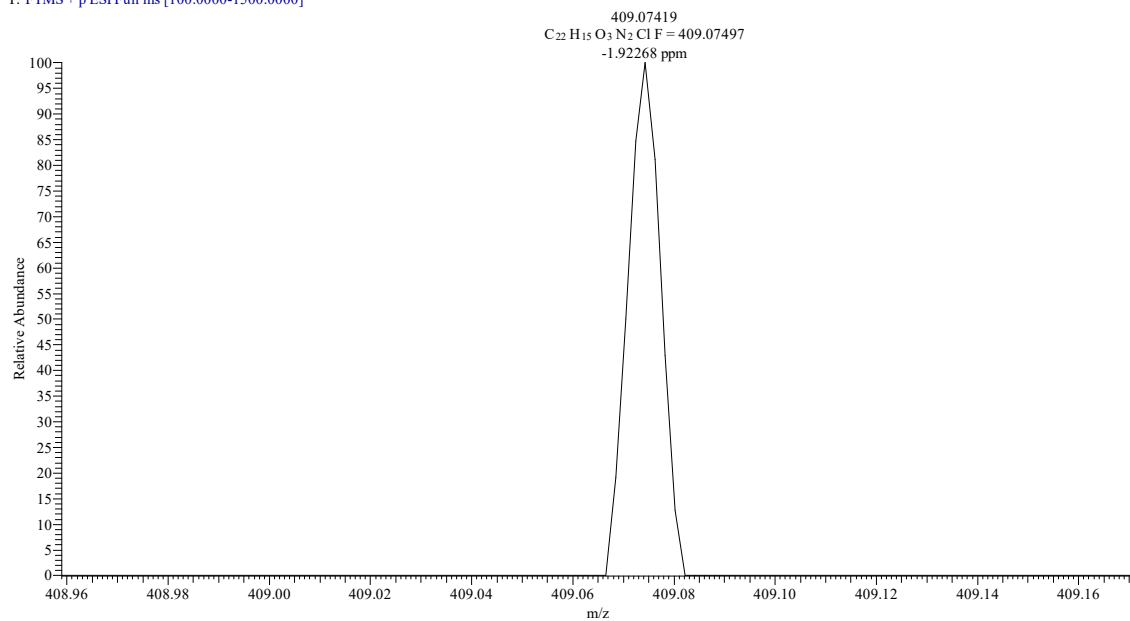

HRMS (ESI) spectrum of compound 5n

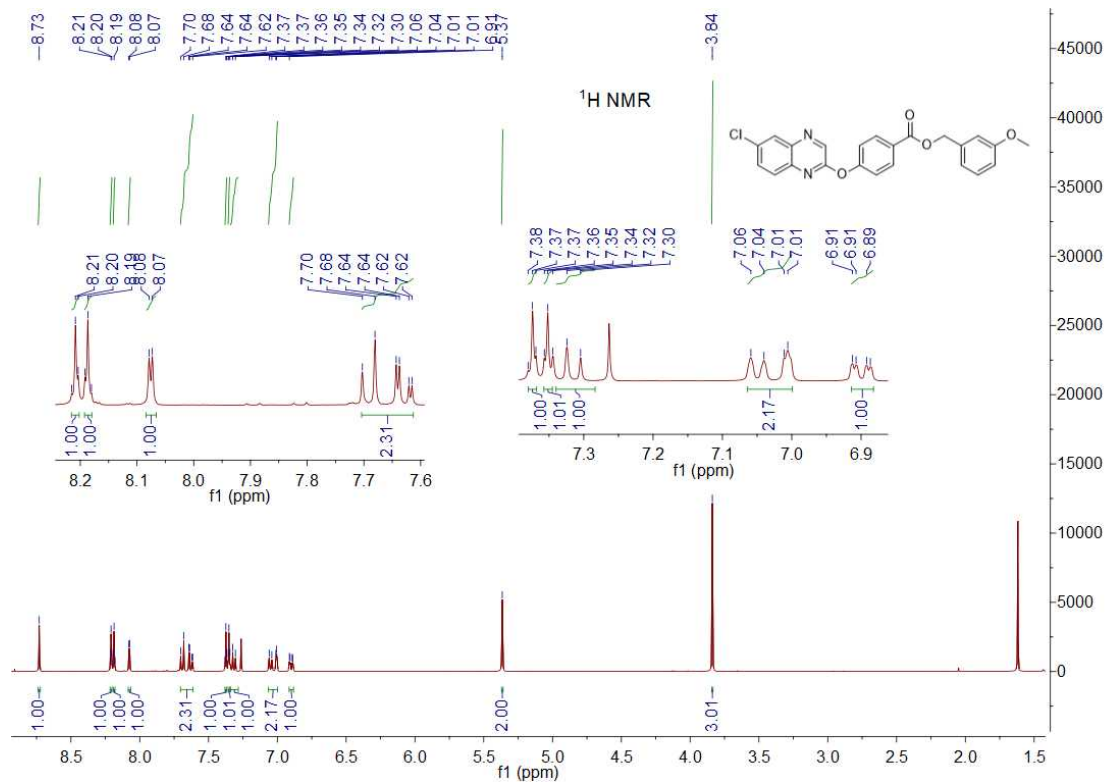

**<sup>1</sup>H NMR spectrum of compound 5o**

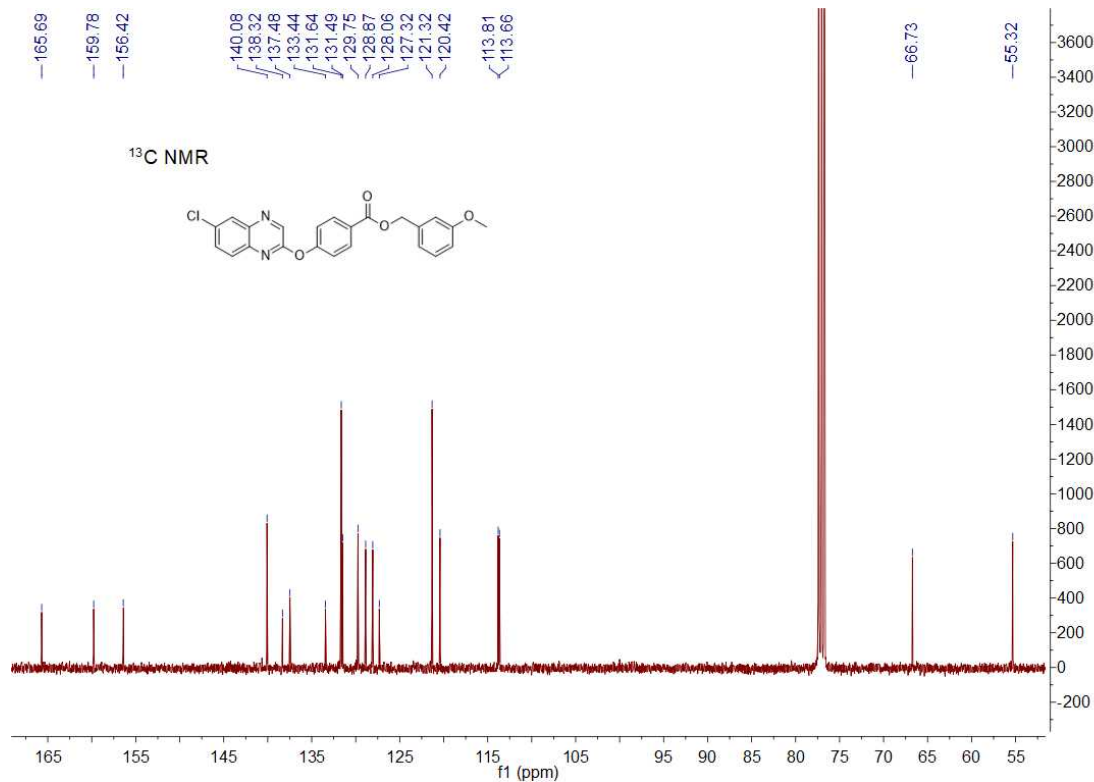

**<sup>13</sup>C NMR spectrum of compound 5o**

TXM-X-15 #30 RT: 0.13 AV: 1 NL: 1.28E6  
T: FTMS + p ESI Full ms [100.0000-1500.0000]

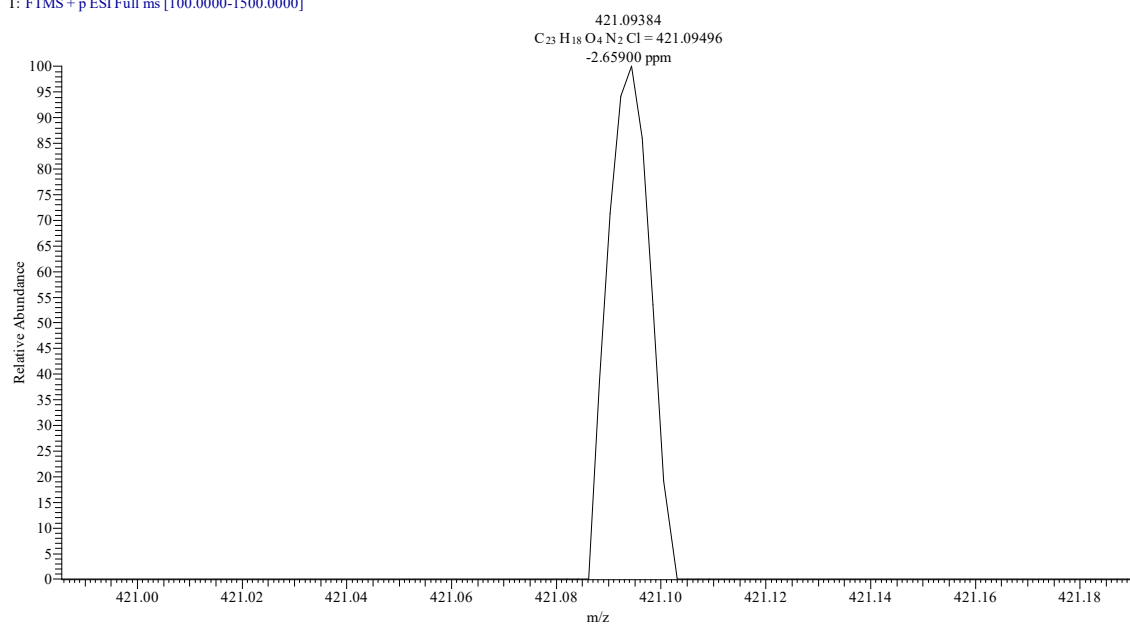

HRMS (ESI) spectrum of compound **50**

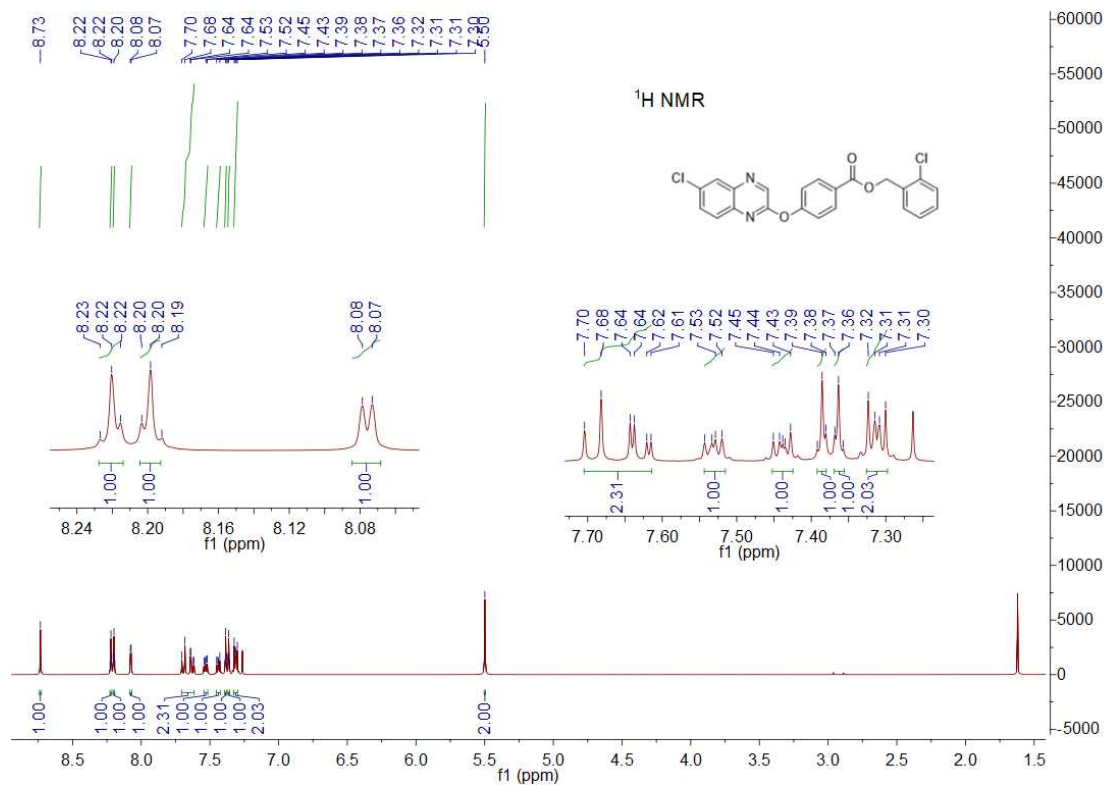

<sup>1</sup>H NMR spectrum of compound 5p

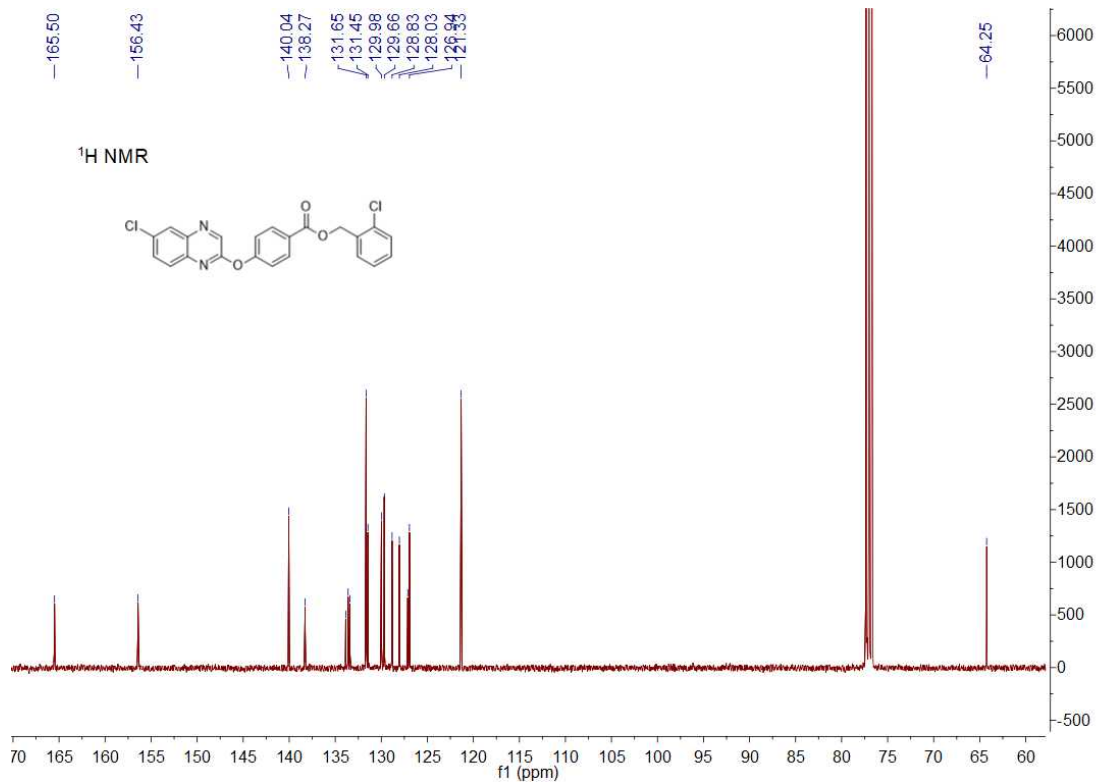

<sup>13</sup>C NMR spectrum of compound 5p



TXM-X-16 #36 RT: 0.16 AV: 1 NL: 2.89E6  
T: FTMS + p ESI Full ms [100.0000-1500.0000]

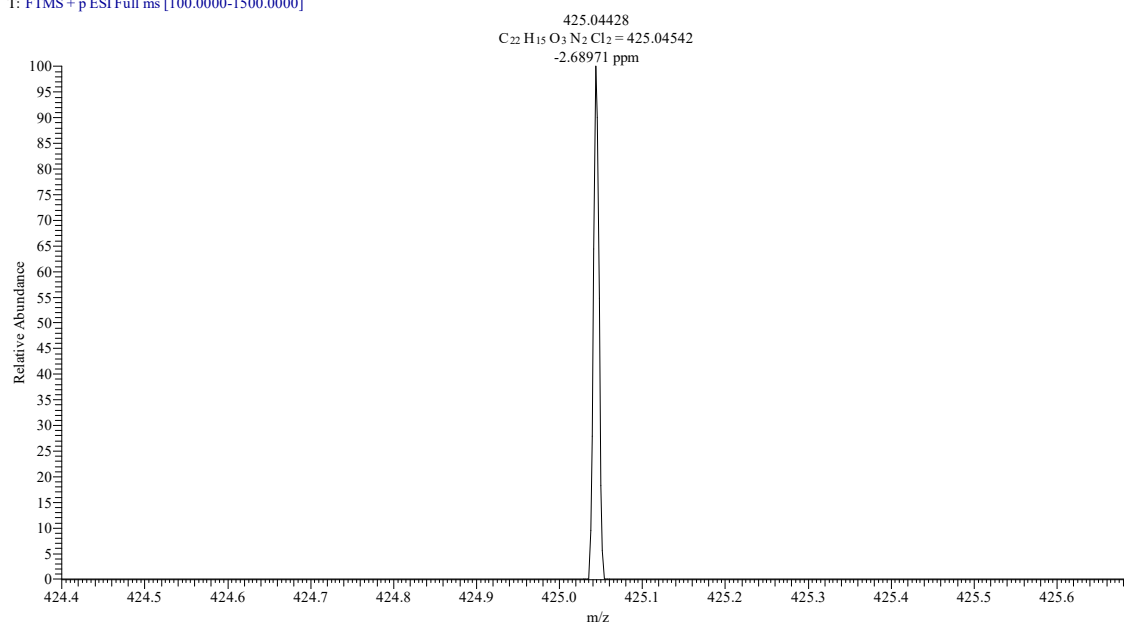

HRMS (ESI) spectrum of compound **5p**

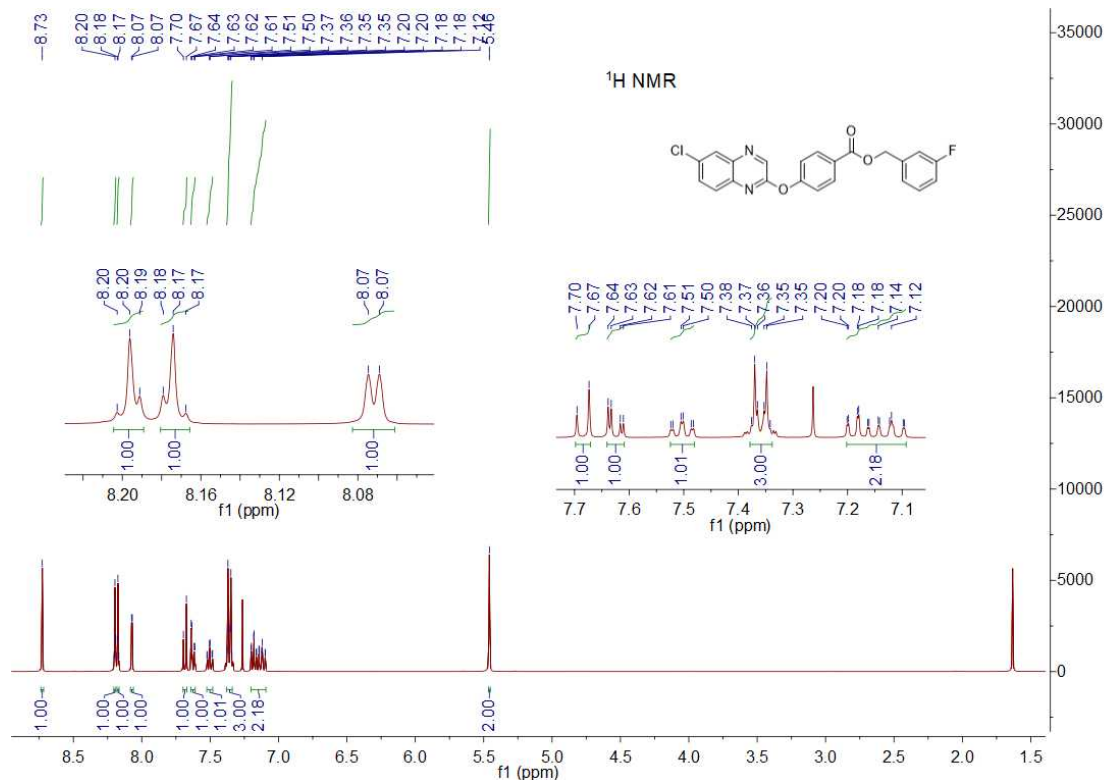

**<sup>1</sup>H NMR spectrum of compound 5q**

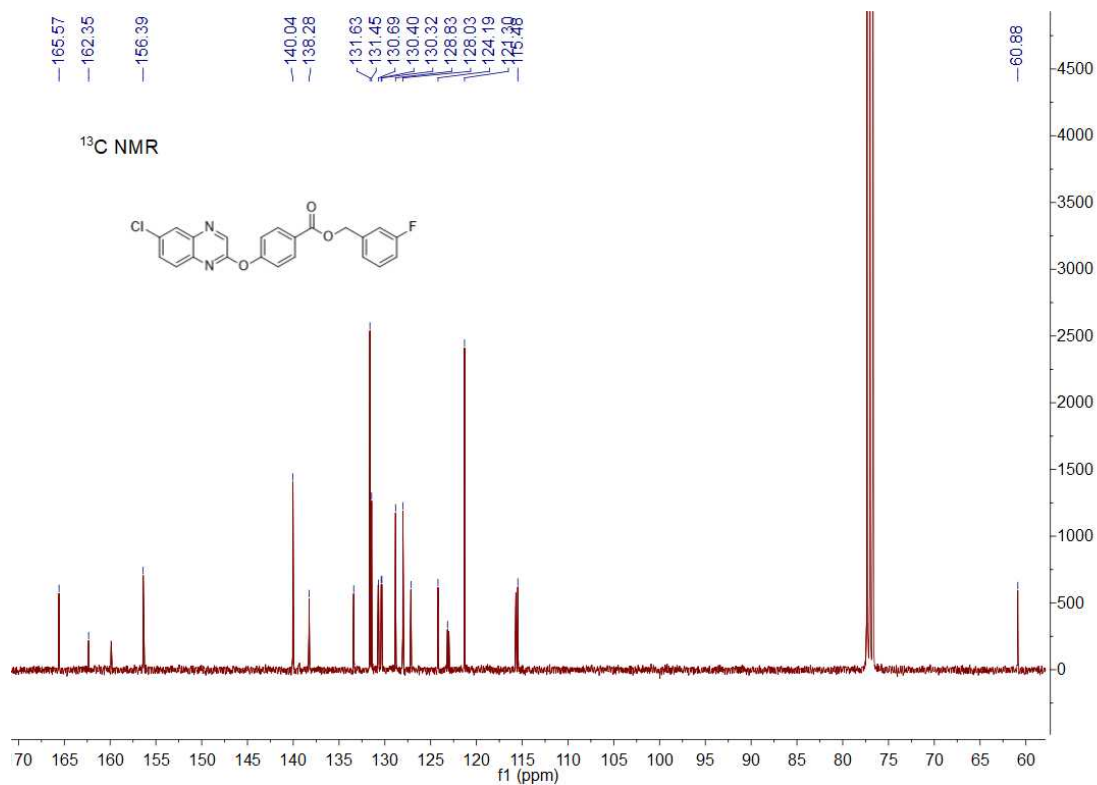

**<sup>13</sup>C NMR spectrum of compound 5q**

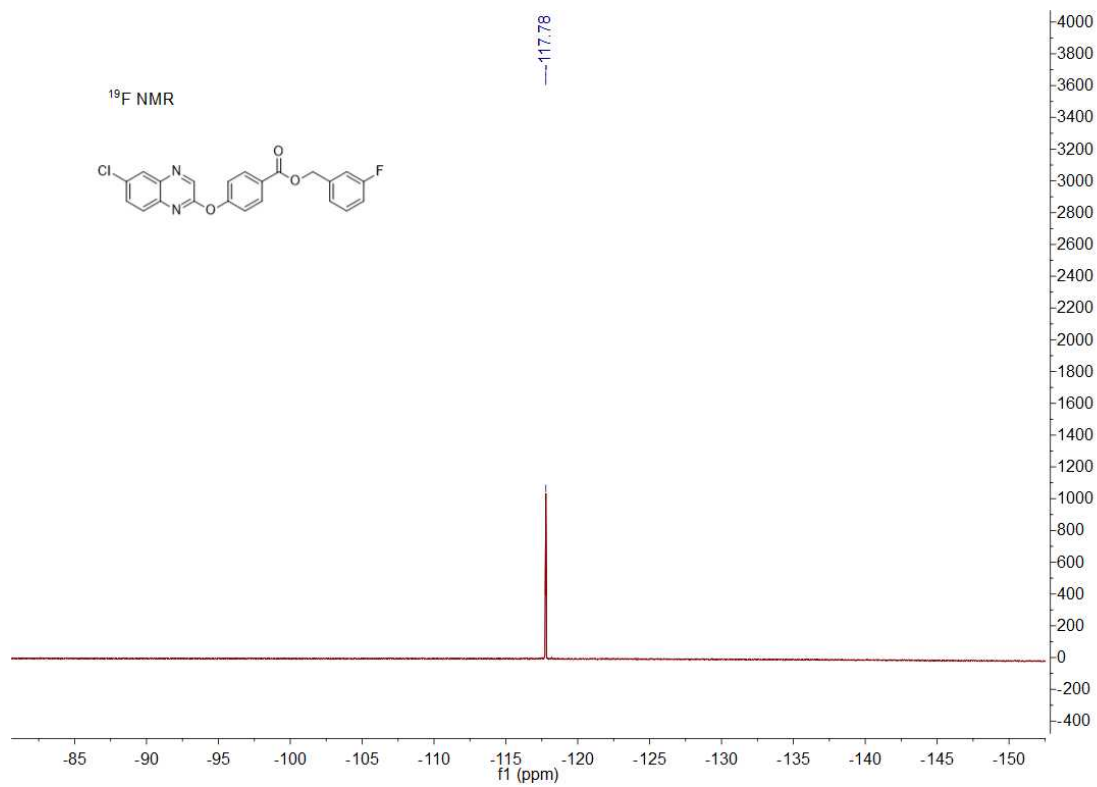

<sup>19</sup>F NMR spectrum of compound **5q**

TXM-X-17 #131 RT: 0.58 AV: 1 NL: 5.28E4  
T: FTMS + p ESI Full ms [100.0000-1500.0000]

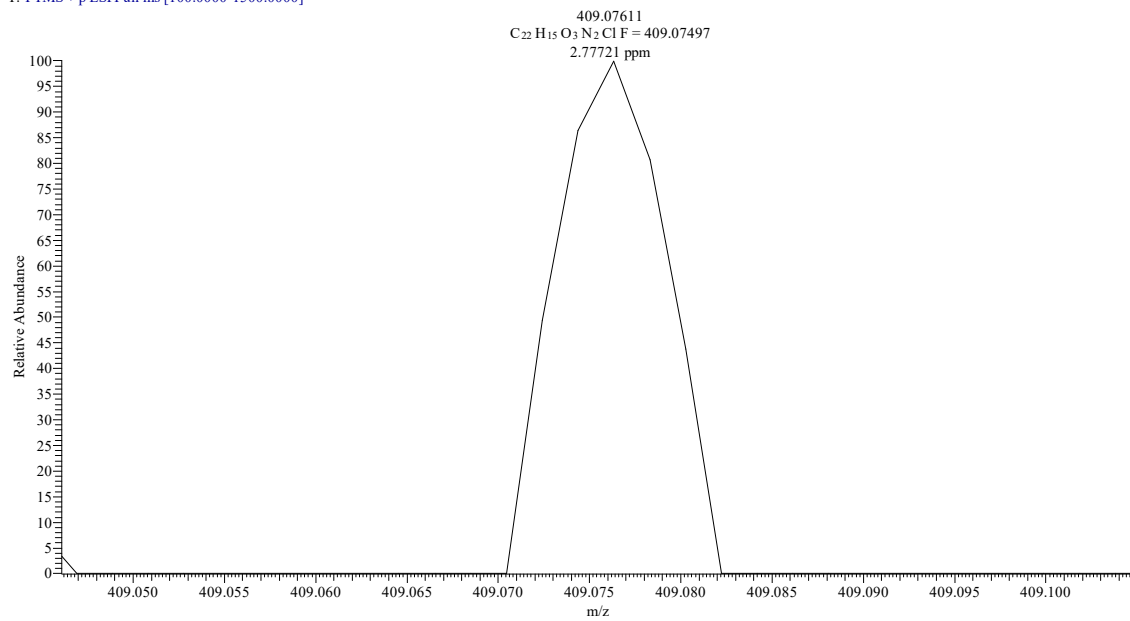

HRMS (ESI) spectrum of compound **5q**

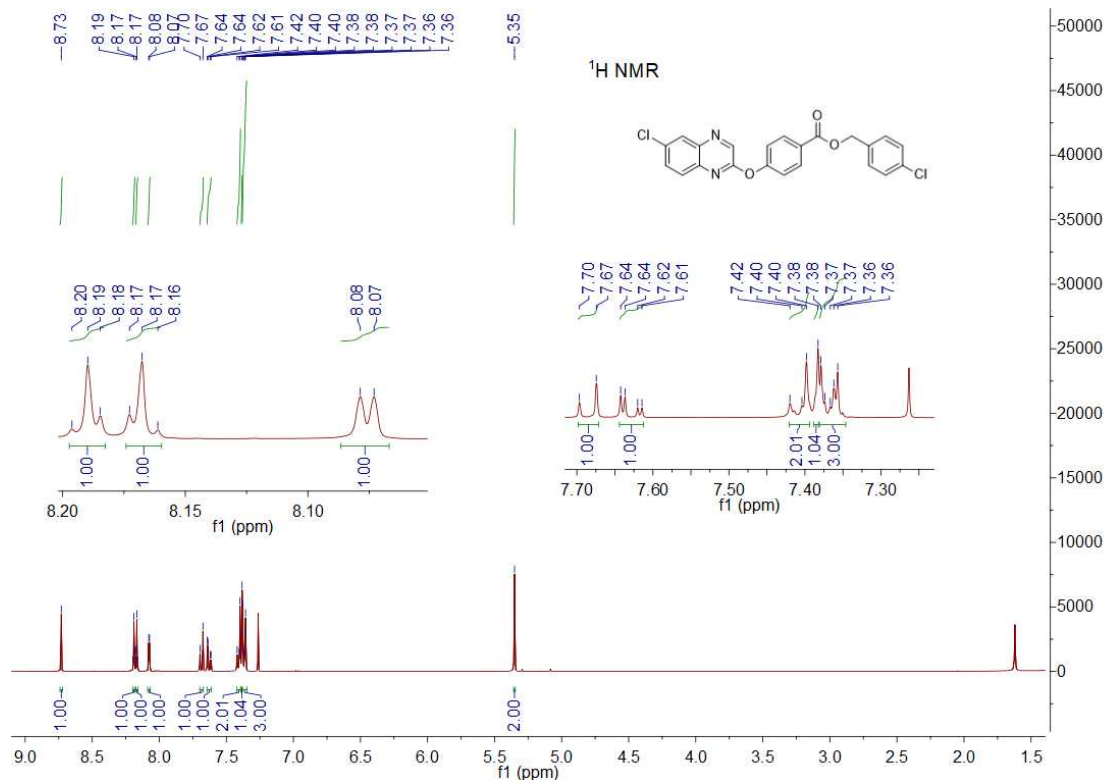

**<sup>1</sup>H NMR spectrum of compound **5r****

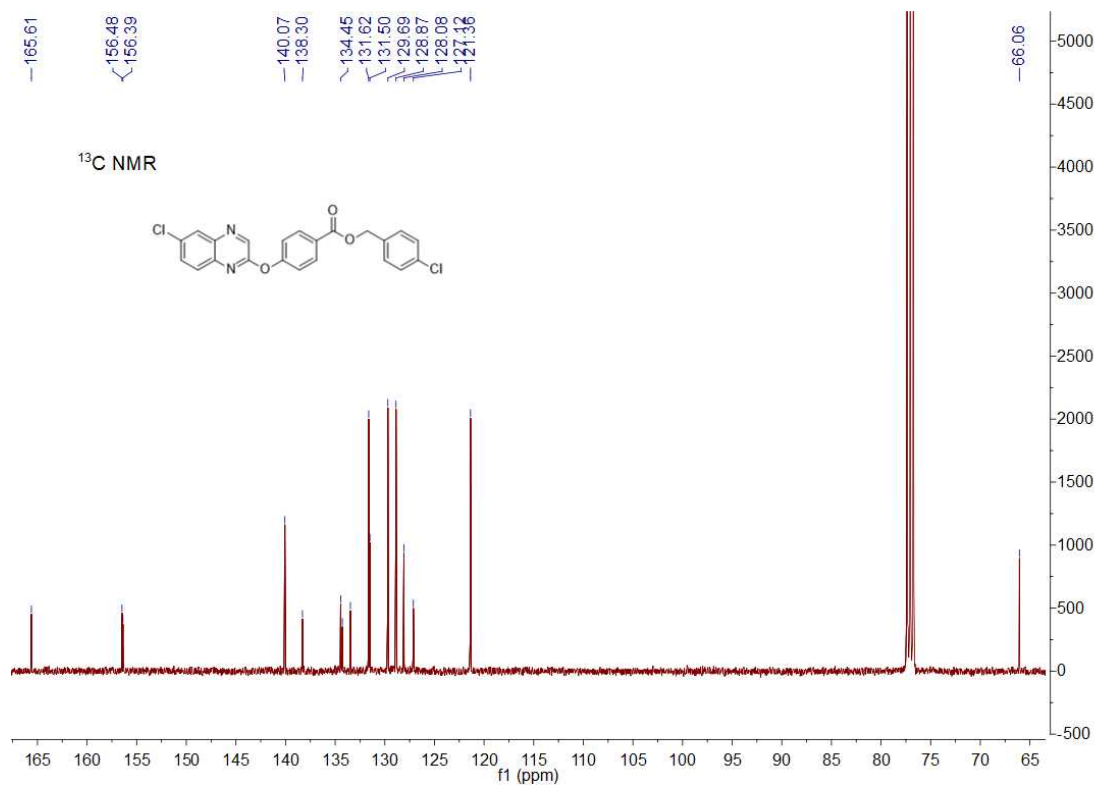

**<sup>13</sup>C NMR spectrum of compound **5r****

TXM-X-18 #46 RT: 0.20 AV: 1 NL: 7.79E5  
T: FTMS + p ESI Full ms [100.0000-1500.0000]

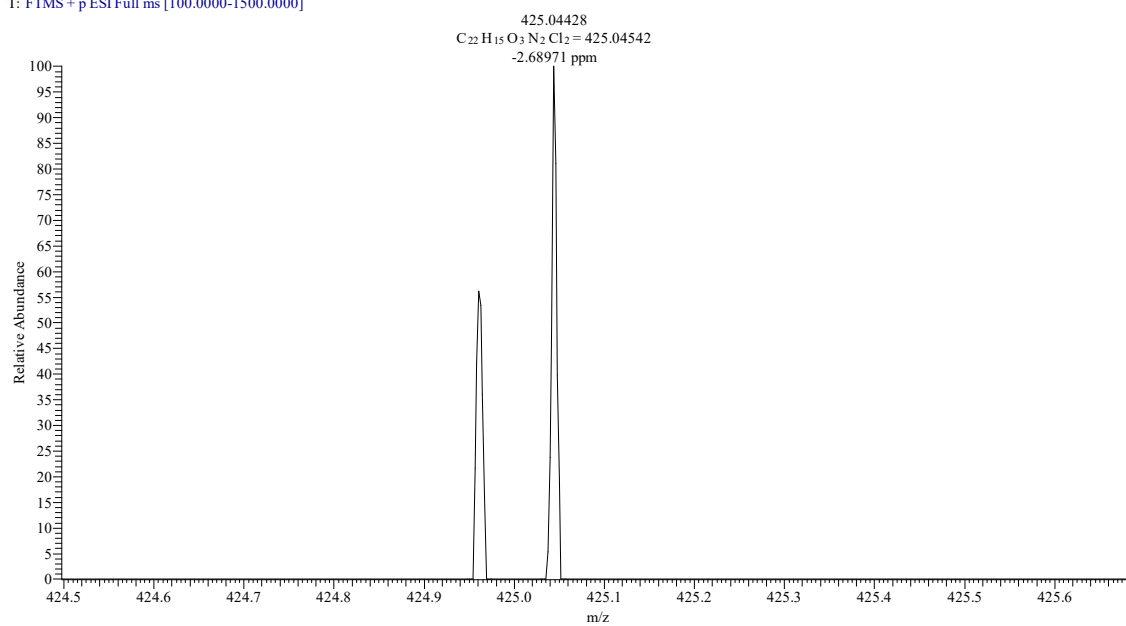

HRMS (ESI) spectrum of compound **5r**

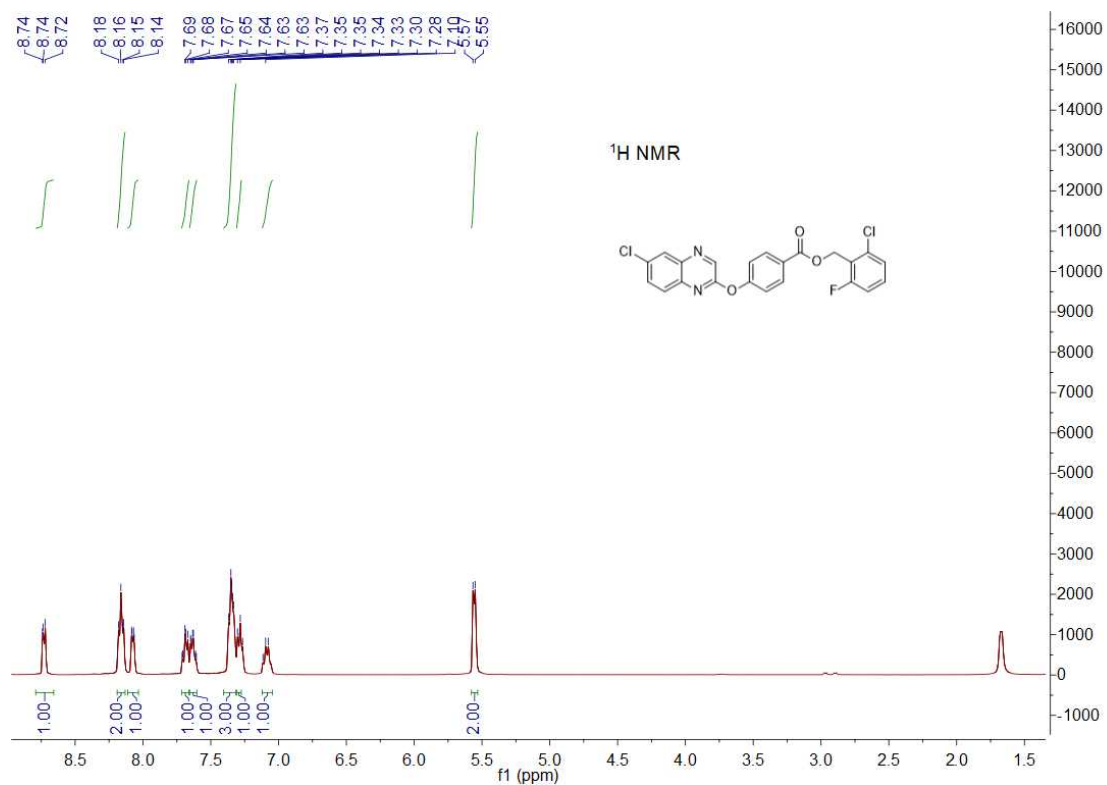

**<sup>1</sup>H NMR spectrum of compound 5s**

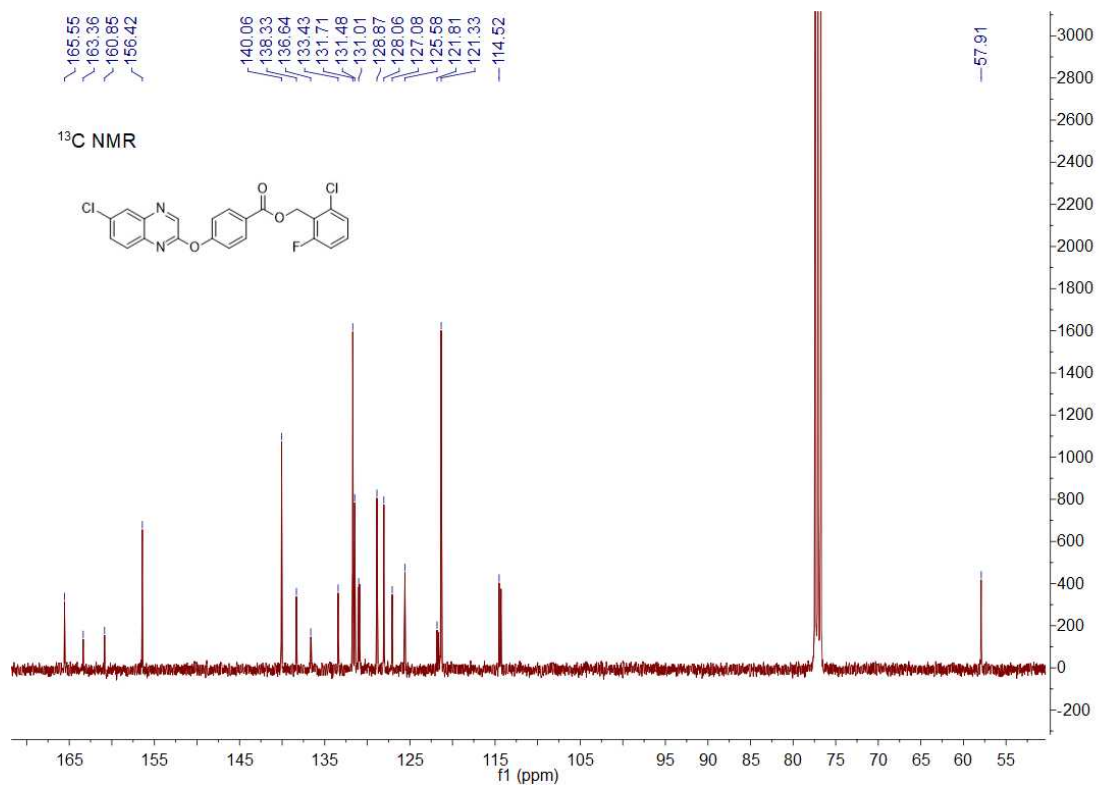

**<sup>13</sup>C NMR spectrum of compound 5s**

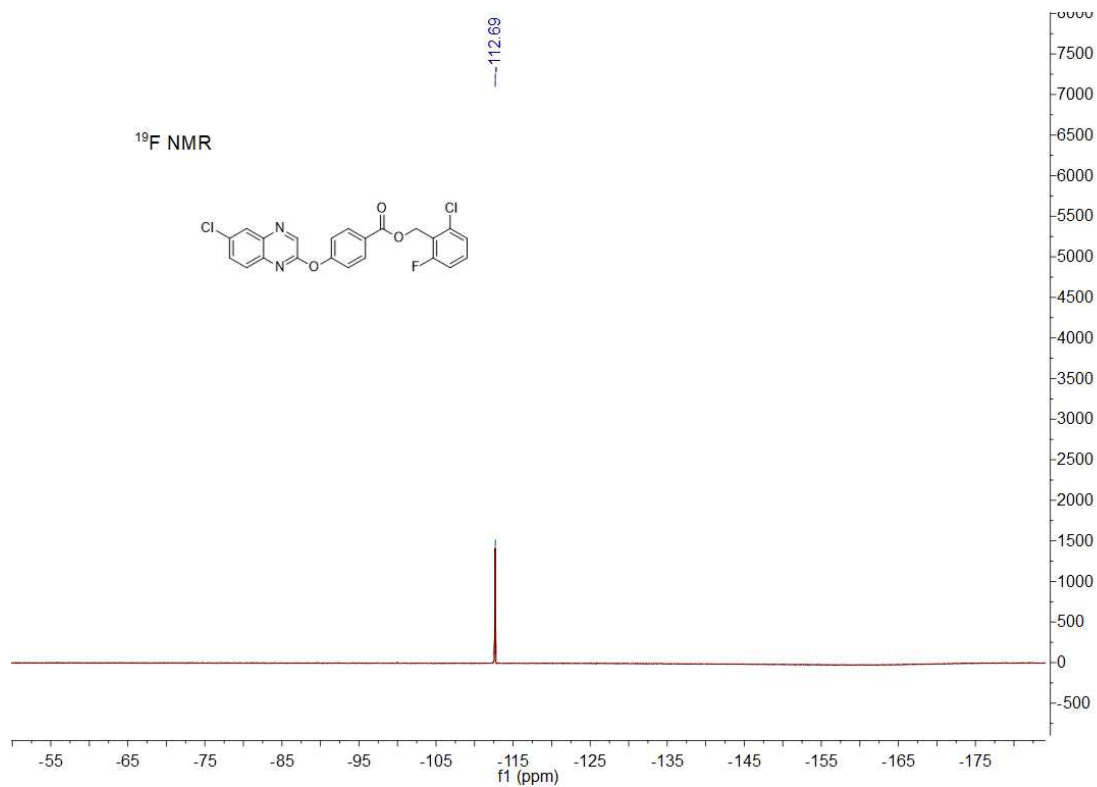

<sup>19</sup>F NMR spectrum of compound 5s

TXM-X-19 #28 RT: 0.12 AV: 1 NL: 2.75E6  
T: FTMS + p ESI Full ms [100.0000-1500.0000]

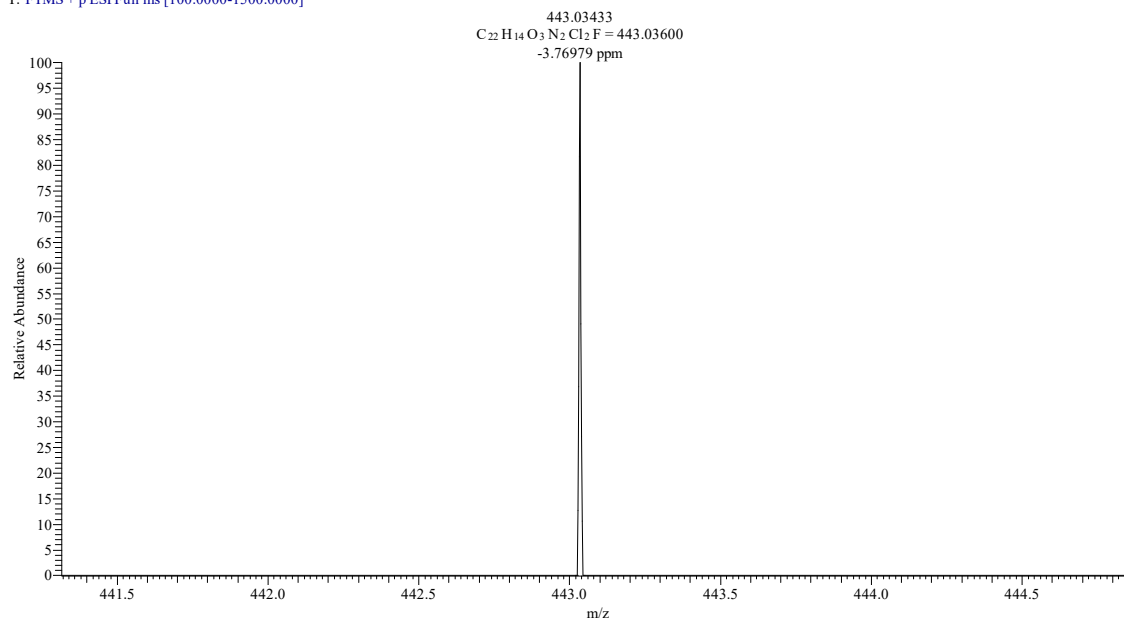

HRMS (ESI) spectrum of compound 5s

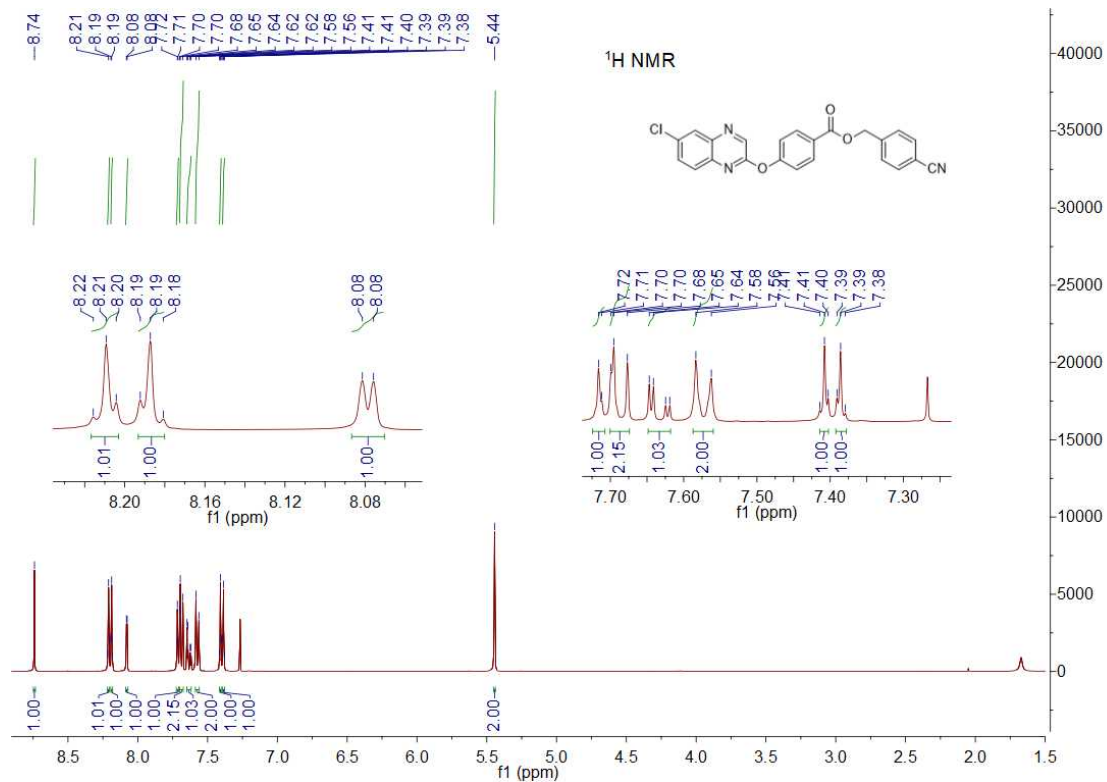

**<sup>1</sup>H NMR spectrum of compound 5t**

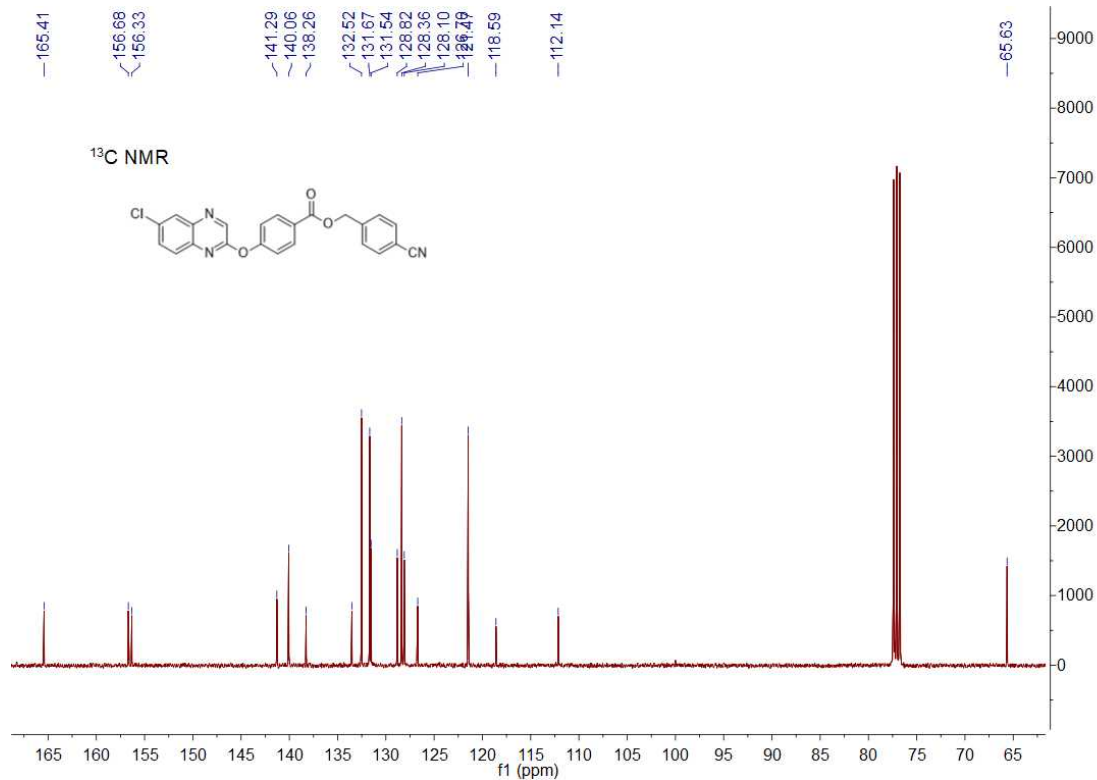

**<sup>13</sup>C NMR spectrum of compound 5t**



TXM-X-20 #55 RT: 0.24 AV: 1 NL: 2.11E5  
T: FTMS + p ESI Full ms [100.0000-1500.0000]

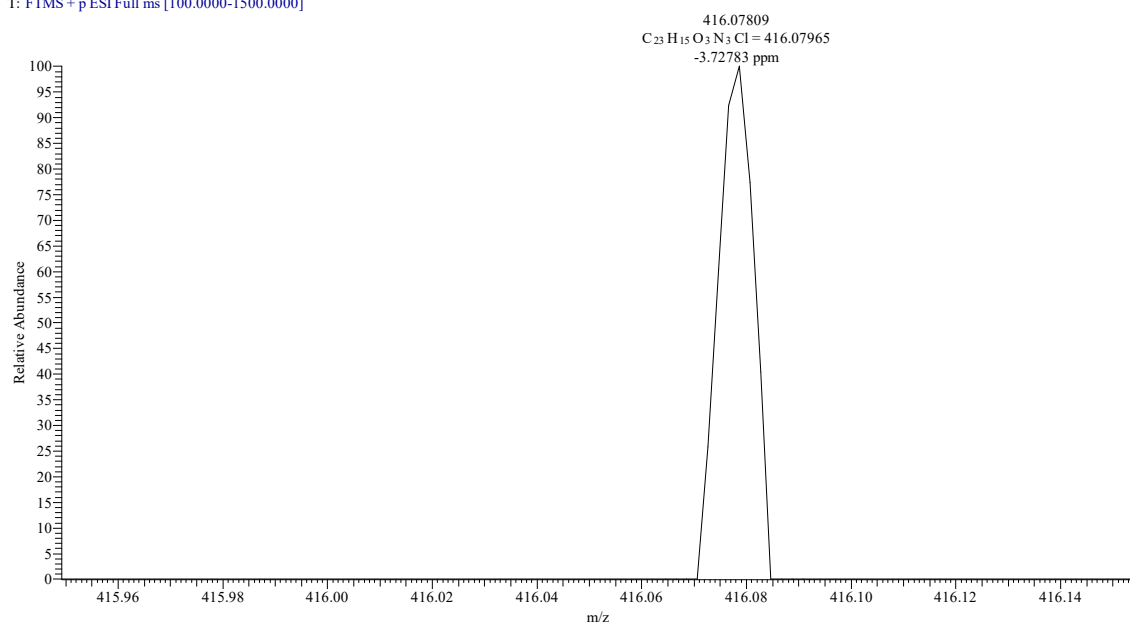

HRMS (ESI) spectrum of compound **5t**

## 5. Table S1 and Table S2

**Table S1.** *In vitro* antibacterial activity of the target compounds against five kinds of bacteria <sup>a</sup>

|    | <i>Ac</i>  |            | <i>Pcb</i> |            | <i>Xoo</i> |            | <i>Rs</i>  |            | <i>Xcm</i> |            |
|----|------------|------------|------------|------------|------------|------------|------------|------------|------------|------------|
|    | 200 µg/mL  | 100 µg/mL  |
| 5a | 44.23±4.88 | 17.63±3.98 | 44.17±4.60 | 12.65±3.39 | 62.53±1.03 | 45.08±1.81 | 68.32±3.87 | 19.43±1.80 | 65.84±1.41 | 61.01±0.17 |
| 5b | 22.27±1.11 | 13.06±3.21 | 32.02±4.19 | 23.47±1.19 | 33.63±3.91 | 19.54±1.41 | 71.33±1.97 | 54.59±3.87 | 51.96±0.18 | 19.25±0.90 |
| 5c | 50.52±4.73 | 47.07±3.34 | 64.77±2.58 | 37.88±2.28 | 59.22±0.85 | 23.52±2.11 | 70.45±4.18 | 35.78±3.33 | 69.09±1.81 | 27.62±5.78 |
| 5d | 37.41±2.07 | 29.97±2.84 | 30.47±1.33 | 18.10±3.68 | 42.17±3.14 | 30.05±4.01 | 61.64±1.49 | 22.24±1.85 | 55.59±0.07 | 16.96±0.78 |
| 5e | 52.28±4.32 | 33.05±2.91 | 62.32±2.46 | 32.38±4.25 | 66.81±0.25 | 39.47±1.85 | 66.57±3.77 | 44.09±2.60 | 60.28±2.09 | 10.66±0.78 |
| 5f | 37.03±2.17 | 34.05±2.45 | 28.36±4.41 | 25.87±2.00 | 53.79±2.61 | 30.11±2.43 | 46.78±3.98 | 18.64±1.52 | 30.77±3.31 | 15.77±2.01 |
| 5g | 50.38±3.06 | 32.56±3.04 | 53.81±2.02 | 27.62±2.42 | 65.49±1.89 | 43.22±3.73 | 52.73±2.55 | 30.64±4.79 | 63.29±0.82 | 27.96±4.30 |
| 5h | 26.36±0.51 | 15.90±2.41 | 57.82±4.81 | 20.87±3.35 | 55.09±0.12 | 24.28±3.05 | 61.57±1.37 | 14.68±3.65 | 33.85±2.25 | 8.96±4.50  |
| 5i | 38.36±1.98 | 16.04±3.27 | 38.49±4.08 | 25.83±0.88 | 61.35±2.57 | 35.66±4.56 | 48.15±1.64 | 22.42±0.84 | 52.45±0.73 | 24.44±5.41 |
| 5j | 29.65±2.22 | 17.05±3.33 | 32.42±2.58 | 23.11±1.38 | 32.83±0.84 | 17.72±2.81 | 29.02±2.67 | 13.58±2.44 | 40.98±3.18 | 13.89±1.08 |
| 5k | 86.28±1.78 | 61.05±4.37 | 68.76±2.18 | 37.47±3.37 | 34.57±3.67 | 15.26±2.61 | 51.07±2.91 | 12.62±0.35 | 39.05±1.58 | 5.33±4.26  |
| 5l | 11.71±2.84 | 6.29±3.06  | 54.22±4.64 | 34.17±2.91 | 67.25±1.49 | 36.12±0.78 | 68.67±0.72 | 25.19±1.12 | 44.37±4.58 | 10.51±1.94 |
| 5m | 32.63±0.63 | 27.91±1.91 | 38.29±1.94 | 29.09±0.37 | 52.11±4.01 | 28.89±2.85 | 65.35±3.15 | 43.03±0.57 | 34.06±1.13 | 39.02±4.47 |
| 5n | 20.57±1.62 | 15.23±3.52 | 34.90±1.72 | 27.71±2.45 | 67.28±4.47 | 31.98±4.81 | 43.46±2.59 | 17.67±4.04 | 45.56±2.79 | 21.55±4.22 |
| 5o | 14.34±2.71 | 6.39±4.07  | 72.64±3.79 | 38.97±3.95 | 72.84±0.52 | 39.02±3.02 | 54.13±1.91 | 38.15±2.29 | 57.48±4.69 | 18.88±2.28 |
| 5p | 39.34±2.24 | 7.42±1.68  | 45.91±2.22 | 29.41±1.25 | 76.15±0.64 | 44.80±3.55 | 41.55±3.63 | 25.05±1.33 | 75.17±4.87 | 42.62±4.01 |
| 5q | 39.97±3.94 | 14.99±0.74 | 43.21±4.88 | 22.05±3.92 | 25.82±2.66 | 11.06±2.98 | 64.06±1.59 | 26.59±3.79 | 74.23±2.91 | 35.03±4.81 |
| 5r | 65.70±6.23 | 39.87±3.46 | 40.39±2.46 | 31.61±4.73 | 34.01±1.27 | 15.88±3.95 | 38.89±2.62 | 13.05±3.17 | 45.45±1.68 | 9.81±1.52  |
| 5s | 31.29±4.02 | 16.95±3.24 | 28.05±4.87 | 22.42±4.01 | 35.52±4.12 | 19.73±2.03 | 51.41±0.06 | 22.02±3.92 | 30.21±0.82 | 29.69±1.25 |
| 5t | 31.12±2.42 | 5.24±4.25  | 23.78±2.94 | 16.46±2.31 | 33.46±0.11 | 15.93±4.68 | 21.19±1.33 | 18.73±0.67 | 34.99±1.33 | 19.62±4.17 |
| TC | 57.67±0.58 | 25.11±2.01 | 51.09±0.33 | 25.32±0.85 | 60.11±1.35 | 26.5±4.42  | 66.01±0.17 | 56.31±2.49 | 67.82±1.55 | 52.12±4.13 |
| BT | 41.07±2.73 | 19.58±1.94 | 49.61±1.61 | 30.22±1.52 | 52.13±0.19 | 19.46±3.50 | 42.33±2.04 | 22.01±0.17 | 46.82±0.17 | 21.57±0.25 |

<sup>a</sup> The average of three trials, <sup>b</sup> Commercial bactericides Bismertiazol (BT) and Thiodiazole-copper (TC) were used as positive control agents.

**Table S2.** *In vitro* antifungal activities of the target compounds against twelve species of fungi at 100 µg/mL<sup>a</sup>

| Chemicals    | <i>AB</i>  | <i>FF</i>   | <i>FO</i>  | <i>CT</i>  | <i>PC</i>  | <i>CG</i>  |
|--------------|------------|-------------|------------|------------|------------|------------|
| <b>5a</b>    | 11.79±2.69 | 22.12±2.42  | 11.76±2.83 | 7.69±2.74  | 15.64±4.76 | 36.64±1.25 |
| <b>5b</b>    | 20.91±4.42 | 23.45±5.01  | 19.75±1.69 | 2.14±3.35  | 18.18±0.69 | 28.88±1.25 |
| <b>5c</b>    | 19.39±1.74 | 17.26±3.45  | 13.45±3.06 | 11.54±3.52 | 31.27±3.23 | 33.62±4.01 |
| <b>5d</b>    | 28.14±3.61 | 1.77±1.48   | 6.72±3.06  | 21.79±4.23 | 26.55±3.21 | 4.31±3.37  |
| <b>5e</b>    | 20.15±2.59 | 10.18±4.04  | 14.29±2.00 | 45.30±1.47 | 32.12±4.56 | 40.52±4.35 |
| <b>5f</b>    | 27.00±4.67 | 20.80±5.82  | 17.23±2.66 | 56.84±2.23 | 20.36±3.23 | 36.21±1.18 |
| <b>5g</b>    | 41.06±2.99 | 21.24±4.10  | 11.34±2.62 | 21.37±1.86 | 35.64±3.68 | 42.24±1.87 |
| <b>5h</b>    | 38.02±2.01 | 22.57±5.01  | 10.50±3.68 | –          | 31.27±3.68 | 1.72±1.18  |
| <b>5i</b>    | 28.52±3.59 | 16.81±3.53  | 13.03±4.64 | 4.70±3.35  | 20.36±2.06 | 37.07±1.87 |
| <b>5j</b>    | 28.14±2.82 | 15.04±2.10  | 13.45±1.83 | 20.09±0.89 | 33.45±1.12 | 34.91±0.93 |
| <b>5k</b>    | 30.42±3.83 | 89.38±1.46  | 57.14±0.01 | 13.68±2.69 | 34.91±0.48 | 14.66±1.45 |
| <b>5l</b>    | 28.90±0.84 | 21.68±1.28  | 18.49±2.71 | 21.79±2.38 | 36.58±2.38 | –          |
| <b>5m</b>    | 18.25±2.01 | 35.84±30.21 | 20.59±1.23 | 5.98±1.12  | 31.27±2.06 | 35.34±2.90 |
| <b>5n</b>    | 33.46±3.01 | 32.30±1.28  | 23.53±1.16 | 29.49±3.73 | 22.55±2.06 | 34.48±1.18 |
| <b>5o</b>    | 27.38±1.99 | 21.68±6.25  | 11.34±2.20 | 3.85±0.55  | 34.55±2.78 | 32.76±2.90 |
| <b>5p</b>    | 35.36±0.44 | 26.99±6.42  | 20.59±1.23 | 32.48±3.42 | 34.91±2.90 | –          |
| <b>5q</b>    | 45.63±3.53 | 37.61±2.46  | 40.34±2.31 | 14.53±1.34 | 33.82±2.69 | 38.36±1.72 |
| <b>5r</b>    | 2.70±2.90  | 33.63±0.01  | 18.07±2.35 | 42.74±4.91 | 19.27±4.66 | 37.07±2.77 |
| <b>5s</b>    | 32.70±3.83 | 26.99±3.23  | 13.87±2.21 | 17.09±3.71 | 22.18±1.61 | 34.48±1.18 |
| <b>5t</b>    | 52.09±1.30 | 26.99±1.28  | 16.39±2.52 | 40.60±1.98 | 36.01±4.60 | –          |
| Azoxystrobin | 76.43±3.44 | 51.34±2.03  | 55.70±0.90 | 77.19±0.02 | 60.36±2.30 | 65.92±3.77 |

<sup>a</sup>The average of three trials.

**Table S2.** *In vitro* antifungal activities of the target compounds against twelve species of fungi at 100  $\mu\text{g/mL}^a$

| Chemicals    | <i>RS</i>        | <i>FG</i>        | <i>PS</i>        | <i>PP</i>        | <i>BC</i>        | <i>PL</i>        |
|--------------|------------------|------------------|------------------|------------------|------------------|------------------|
| <b>5a</b>    | 14.02 $\pm$ 3.52 | 31.49 $\pm$ 1.32 | 43.7 $\pm$ 4.84  | 22.12 $\pm$ 2.42 | 34.42 $\pm$ 1.02 | 29.84 $\pm$ 3.34 |
| <b>5b</b>    | 41.29 $\pm$ 1.97 | 11.49 $\pm$ 3.10 | 33.61 $\pm$ 1.70 | 23.45 $\pm$ 1.01 | 21.29 $\pm$ 2.07 | 31.05 $\pm$ 2.97 |
| <b>5c</b>    | 25.76 $\pm$ 2.11 | 15.74 $\pm$ 1.57 | 42.44 $\pm$ 2.20 | 17.26 $\pm$ 3.45 | 29.06 $\pm$ 2.56 | 29.03 $\pm$ 2.61 |
| <b>5d</b>    | 40.53 $\pm$ 2.01 | 26.81 $\pm$ 3.89 | 6.72 $\pm$ 1.83  | 1.77 $\pm$ 1.48  | –                | 25.11 $\pm$ 1.37 |
| <b>5e</b>    | 30.30 $\pm$ 1.67 | 31.49 $\pm$ 1.42 | 42.02 $\pm$ 2.66 | 10.18 $\pm$ 4.04 | 29.31 $\pm$ 1.09 | 28.63 $\pm$ 4.04 |
| <b>5f</b>    | 28.79 $\pm$ 2.52 | 12.77 $\pm$ 3.33 | 31.51 $\pm$ 0.25 | 20.80 $\pm$ 2.82 | 34.32 $\pm$ 0.02 | 33.47 $\pm$ 4.48 |
| <b>5g</b>    | 19.32 $\pm$ 1.42 | 32.77 $\pm$ 3.96 | 39.50 $\pm$ 2.83 | 21.24 $\pm$ 4.10 | 23.07 $\pm$ 1.56 | 16.53 $\pm$ 1.18 |
| <b>5h</b>    | 35.23 $\pm$ 2.50 | 23.83 $\pm$ 3.63 | 35.71 $\pm$ 0.57 | 22.57 $\pm$ 1.01 | 33.03 $\pm$ 4.51 | 22.98 $\pm$ 2.86 |
| <b>5i</b>    | 34.85 $\pm$ 0.07 | 12.34 $\pm$ 3.41 | 8.40 $\pm$ 2.31  | 16.81 $\pm$ 3.53 | 23.65 $\pm$ 1.55 | 27.42 $\pm$ 1.37 |
| <b>5j</b>    | 89.56 $\pm$ 0.39 | 17.87 $\pm$ 2.65 | 23.53 $\pm$ 1.71 | 15.04 $\pm$ 2.10 | –                | 49.60 $\pm$ 2.12 |
| <b>5k</b>    | 32.58 $\pm$ 3.33 | 13.62 $\pm$ 0.92 | 89.92 $\pm$ 2.78 | 89.38 $\pm$ 3.05 | 39.45 $\pm$ 0.32 | 53.63 $\pm$ 1.62 |
| <b>5l</b>    | 28.03 $\pm$ 2.79 | 12.34 $\pm$ 1.85 | 31.93 $\pm$ 4.11 | 21.68 $\pm$ 1.28 | 21.62 $\pm$ 1.59 | 23.79 $\pm$ 1.18 |
| <b>5m</b>    | 31.82 $\pm$ 2.16 | 20.43 $\pm$ 2.52 | 49.58 $\pm$ 3.23 | 35.84 $\pm$ 0.21 | 19.58 $\pm$ 0.76 | 46.37 $\pm$ 3.18 |
| <b>5n</b>    | 31.44 $\pm$ 1.54 | 19.15 $\pm$ 3.18 | 51.26 $\pm$ 2.71 | 32.30 $\pm$ 1.28 | 26.32 $\pm$ 4.04 | 30.24 $\pm$ 1.51 |
| <b>5o</b>    | 20.83 $\pm$ 1.54 | 13.19 $\pm$ 2.72 | 47.06 $\pm$ 3.75 | 21.68 $\pm$ 0.25 | 34.16 $\pm$ 2.65 | 32.26 $\pm$ 3.05 |
| <b>5p</b>    | 21.97 $\pm$ 2.11 | 16.17 $\pm$ 4.15 | 45.38 $\pm$ 1.83 | 26.99 $\pm$ 3.42 | 32.25 $\pm$ 3.55 | 18.15 $\pm$ 2.52 |
| <b>5q</b>    | 43.18 $\pm$ 2.58 | 22.13 $\pm$ 2.37 | 38.24 $\pm$ 1.13 | 37.61 $\pm$ 2.46 | 28.68 $\pm$ 0.88 | 43.55 $\pm$ 3.64 |
| <b>5r</b>    | 18.18 $\pm$ 4.28 | 22.55 $\pm$ 1.17 | 37.39 $\pm$ 3.39 | 33.63 $\pm$ 0.35 | 27.79 $\pm$ 2.32 | 23.79 $\pm$ 3.55 |
| <b>5s</b>    | 23.48 $\pm$ 2.28 | 18.72 $\pm$ 2.23 | 11.34 $\pm$ 0.91 | 26.99 $\pm$ 3.23 | 36.55 $\pm$ 2.89 | 33.06 $\pm$ 1.76 |
| <b>5t</b>    | 95.17 $\pm$ 1.03 | 16.60 $\pm$ 2.02 | 25.21 $\pm$ 5.78 | 26.99 $\pm$ 1.28 | 28.34 $\pm$ 0.90 | 28.23 $\pm$ 2.74 |
| Azoxystrobin | 76.43 $\pm$ 3.44 | 51.34 $\pm$ 2.03 | 55.70 $\pm$ 0.90 | 77.19 $\pm$ 0.02 | 60.36 $\pm$ 2.30 | 85.37 $\pm$ 4.25 |

<sup>a</sup>The average of three trials.
